# Supplementary material for: GPR37 expression as a prognostic marker in gliomas: a bioinformatics-based analysis
Source: publisher site journal article supplement (doi:10.18632/aging.205063), 2023-10-13
Supplement: Supplementary file [file aging-v15i19-205063-supplementary-material-SD1.pdf]

SUPPLEMENTARY FIGURE

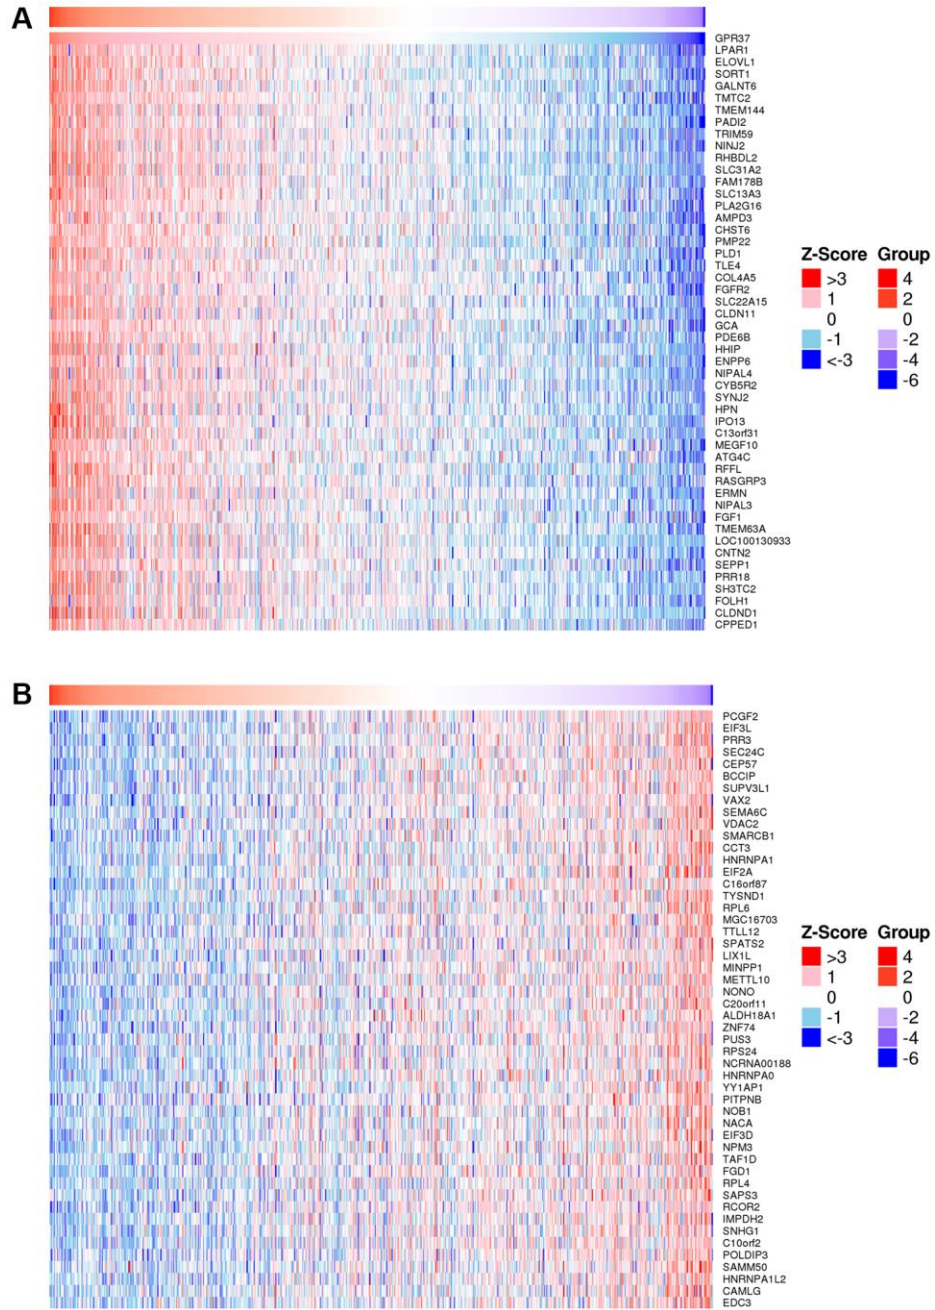

**Supplementary Figure 1. Co-expression and gene set enrichment analysis in glioma. (A)** Heatmap of the 50 negatively correlated genes of *GPR37*. **(B)** Heatmap of the top 50 positively correlated genes of *GPR37*.
