# Supplementary material for: GPR37 expression as a prognostic marker in gliomas: a bioinformatics-based analysis
Source: publisher site journal article supplement (doi:10.18632/aging.205063), 2023-10-13
Supplement: Supplementary file [file aging-v15i19-205063-supplementary-material-SD3.pdf]

## SUPPLEMENTARY TABLES

**Supplementary Table 2. The clinicopathological variables of 38 patients.**

| Characteristics                          | Total (N)  |
|------------------------------------------|------------|
| Grade, <i>n</i> (%)                      |            |
| G2 & G3                                  | 9 (23.7%)  |
| G4                                       | 29 (76.3%) |
| Histological type, <i>n</i> (%)          |            |
| Oligodendroglioma, IDH mut, 1p/19q code1 | 4 (10.5%)  |
| Astrocytoma, IDH mut                     | 10 (26.3%) |
| Glioblastoma                             | 24 (63.2%) |
| Gender, <i>n</i> (%)                     |            |
| Male                                     | 22 (57.9%) |
| Female                                   | 16 (42.1%) |
| Age, <i>n</i> (%)                        |            |
| ≤60                                      | 27 (71.1%) |
| >60                                      | 11 (28.9%) |

**Supplementary Table 3. Cox analysis of GPR37 expression and other clinicopathological variables for OS (univariate and multivariate).**

| Characteristics                               | Total (N) | HR (95% CI) Univariate analysis (OS) | <i>P</i> value Univariate analysis | HR (95% CI) Multivariate analysis (OS) | <i>P</i> value Multivariate analysis |
|-----------------------------------------------|-----------|--------------------------------------|------------------------------------|----------------------------------------|--------------------------------------|
| GPR37                                         | 698       |                                      | <0.001                             |                                        |                                      |
| Low                                           | 351       | Reference                            |                                    | Reference                              |                                      |
| High                                          | 347       | 1.851 (1.450–2.362)                  | <0.001                             | 1.771 (1.180–2.658)                    | 0.006                                |
| Grade                                         | 695       |                                      | <0.001                             |                                        |                                      |
| G4                                            | 284       | Reference                            |                                    | Reference                              |                                      |
| G2 & G3                                       | 411       | 0.116 (0.088–0.153)                  | <0.001                             | 2.482 (0.962–6.405)                    | 0.060                                |
| Histological Type                             | 688       |                                      | <0.001                             |                                        |                                      |
| Glioblastoma, IDH wildtype                    | 246       | Reference                            |                                    | Reference                              |                                      |
| Oligodendroglioma, IDH mutation, 1p/19q-code1 | 171       | 0.081 (0.052–0.125)                  | <0.001                             | 0.130 (0.048–0.354)                    | <0.001                               |
| Astrocytoma, IDH mutation                     | 271       | 0.137 (0.103–0.184)                  | <0.001                             | 0.211 (0.090–0.494)                    | <0.001                               |
| CDKN2A/B homdel                               | 698       |                                      | <0.001                             |                                        |                                      |
| Non-homdel                                    | 549       | Reference                            |                                    | Reference                              |                                      |
| Homdel                                        | 149       | 5.332 (4.123–6.896)                  | <0.001                             | 4.770 (2.617–8.694)                    | <0.001                               |
| Age                                           | 698       |                                      | <0.001                             |                                        |                                      |
| ≤60                                           | 555       | Reference                            |                                    | Reference                              |                                      |
| >60                                           | 143       | 4.696 (3.620–6.093)                  | <0.001                             | 4.189 (2.639–6.650)                    | <0.001                               |
| Gender                                        | 698       |                                      | 0.071                              |                                        |                                      |
| Male                                          | 401       | Reference                            |                                    |                                        |                                      |
| Female                                        | 297       | 0.800 (0.627–1.021)                  | 0.073                              |                                        |                                      |
| Primary therapy outcome                       | 464       |                                      | <0.001                             |                                        |                                      |
| PR & CR                                       | 204       | Reference                            |                                    | Reference                              |                                      |
| PD & SD                                       | 260       | 4.868 (2.783–8.514)                  | <0.001                             | 4.000 (2.268–7.055)                    | <0.001                               |

**Supplementary Table 4. Cox analysis of GPR37 expression and other clinicopathological variables for DSS (univariate and multivariate).**

| Characteristics                                 | Total (N) | HR (95% CI)<br>Univariate analysis<br>(DSS) | P value<br>Univariate<br>analysis | HR (95% CI)<br>Multivariate analysis<br>(DSS) | P value<br>Multivariate<br>analysis |
|-------------------------------------------------|-----------|---------------------------------------------|-----------------------------------|-----------------------------------------------|-------------------------------------|
| GPR37                                           | 677       |                                             | <0.001                            |                                               |                                     |
| Low                                             | 339       | Reference                                   |                                   | Reference                                     |                                     |
| High                                            | 338       | 2.031 (1.565–2.637)                         | <0.001                            | 1.834 (1.196–2.813)                           | 0.005                               |
| Grade                                           | 674       |                                             | <0.001                            |                                               |                                     |
| G4                                              | 270       | Reference                                   |                                   | Reference                                     |                                     |
| G2 & G3                                         | 404       | 0.105 (0.078–0.141)                         | <0.001                            | 2.427 (0.926–6.364)                           | 0.071                               |
| Histological Type                               | 667       |                                             | <0.001                            |                                               |                                     |
| Glioblastoma, IDH wildtype                      | 232       | Reference                                   |                                   | Reference                                     |                                     |
| Oligodendroglioma, IDH<br>mutation,1p/19q-codel | 170       | 0.071 (0.044–0.115)                         | <0.001                            | 0.112 (0.040–0.315)                           | <0.001                              |
| Astrocyoma, IDH mutation                        | 265       | 0.133 (0.098–0.182)                         | <0.001                            | 0.199 (0.085–0.468)                           | <0.001                              |
| CDKN2A/B homdel                                 | 677       |                                             | <0.001                            |                                               |                                     |
| Non-homdel                                      | 537       | Reference                                   |                                   | Reference                                     |                                     |
| Homdel                                          | 140       | 5.457 (4.167–7.147)                         | <0.001                            | 4.716 (2.573–8.646)                           | <0.001                              |
| Age                                             | 677       |                                             | <0.001                            |                                               |                                     |
| ≤60                                             | 544       | Reference                                   |                                   | Reference                                     |                                     |
| >60                                             | 133       | 4.528 (3.430–5.978)                         | <0.001                            | 3.815 (2.352–6.190)                           | <0.001                              |
| Gender                                          | 677       |                                             | 0.104                             |                                               |                                     |
| Male                                            | 388       | Reference                                   |                                   |                                               |                                     |
| Female                                          | 289       | 0.809 (0.625–1.047)                         | 0.107                             |                                               |                                     |
| Primary therapy outcome                         | 460       |                                             | <0.001                            |                                               |                                     |
| PR & CR                                         | 204       | Reference                                   |                                   | Reference                                     |                                     |
| PD & SD                                         | 256       | 5.486 (3.009–10.001)                        | <0.001                            | 4.442 (2.412–8.182)                           | <0.001                              |

**Supplementary Table 5. Gene enrichment study based on the phenotypes of high and low GPR37 expression.**

| Gene set name                                                     | NES    |
|-------------------------------------------------------------------|--------|
| High expression                                                   |        |
| GO_NEGATIVE_REGULATION_OF_T_CELL_RECEPTOR_SIGNALING_PATHWAY       | 1.766  |
| GO_REGULATION_OF_MACROPHAGE_DERIVED_FOAM_CELL_DIFFERENTIATION     | 1.737  |
| GO_LEUKOCYTE_PROLIFERATION                                        | 1.69   |
| GO_B_CELL_PROLIFERATION                                           | 1.668  |
| GO_MYELOID_LEUKOCYTE_DIFFERENTIATION                              | 1.612  |
| KEGG_NEUROACTIVE_LIGAND_RECEPTOR_INTERACTION                      | 1.754  |
| KEGG_CALCIIUM_SIGNALING_PATHWAY                                   | 1.654  |
| KEGG_B_CELL_RECEPTOR_SIGNALING_PATHWAY                            | 1.621  |
| KEGG_PPAR_SIGNALING_PATHWAY                                       | 1.612  |
| KEGG_TOLL_LIKE_RECEPTOR_SIGNALING_PATHWAY                         | 1.608  |
| Low expression                                                    |        |
| GO_HUMORAL_IMMUNE_RESPONSE_MEDIATED_BY_CIRCULATING_IMMUNOGLOBULIN | –3.223 |
| GO_IMMUNOGLOBULIN_RECEPTOR_BINDING                                | –3.357 |

|                                       |        |
|---------------------------------------|--------|
| GO_ANTIGEN_BINDING                    | -3.36  |
| GO_IMMUNOGLOBULIN_COMPLEX_CIRCULATING | -3.37  |
| GO_IMMUNOGLOBULIN_COMPLEX             | -3.678 |
| KEGG_OXIDATIVE_PHOSPHORYLATION        | -1.469 |
| KEGG_SPLICEOSOME                      | -1.626 |
| KEGG_RIBOSOME                         | -3.092 |

---
