# Supplementary material for: GPR37 expression as a prognostic marker in gliomas: a bioinformatics-based analysis
Source: Aging (Albany NY). 2023 Oct 13;15(19):10146–67. doi: 10.18632/aging.205063 (PMC10599758; doi:10.18632/aging.205063)
Supplement: Supplementary Table 1 [file aging-15-205063-s002.xlsx]

## Sheet: Supplementary Table 1
Supplementary Table 1. The clinical data and molecular data of all glioma samples
Clinical Data													Molecular Data
File	Expression of GPR37(TPM)	Log2(TPM+1)	Patient ID	gender	Diagnosis Age	Primary therapy outcom	OS(1=Dead)	OS Time(days)	DSS(1=Dead)	DSS Time(days)	Histology	CNS WHO 2021 Grade	IDH status	1p/19q	CDKN2B	CDKN2A	CDKN2A/B	TERT promoter status	EGFR status	H3-3A	H3C2	Chr 19/20 co-gain	Chr 7 gain/Chr 10 loss	BRAF-KIAA1549 fusion	BRAF V600E status	ATRX status	MGMT promoter status
TCGA-WY-A85B-01A-11R-A36H-07	18.4102	4.27874	TCGA-WY-A85B	Male	24	Complete Remission/Response	0	1393	0	1393	Astroctyoma, IDH mut	G2&G3	Mutant	non-codel	no alteration	no alteration	non-homdel	no alteration	no alteration	no alteration	no alteration	No chr 19/20 gain	No combined CNA	WT	WT	Mutant	Methylated
TCGA-DU-7010-01A-11R-2027-07	71.6454	6.1828	TCGA-DU-7010	Female	58	Progressive Disease	1	456	1	456	Astroctyoma, IDH mut	G2&G3	Mutant	non-codel	no alteration	no alteration	non-homdel	no alteration	no alteration	no alteration	no alteration	No chr 19/20 gain	No combined CNA	WT	WT	WT	Methylated
TCGA-QH-A6X5-01A-12R-A32Q-07	90.523	6.51606	TCGA-QH-A6X5	Female	58	[Unknown]	0	497	0	497	Oligodendroglioma, IDH mut, 1p/19q-codel	G2&G3	Mutant	codel	no alteration	no alteration	non-homdel	no alteration	no alteration	no alteration	no alteration	No chr 19/20 gain	No combined CNA	WT	WT	WT	Methylated
TCGA-CS-6290-01A-11R-1708-07	54.9162	5.80519	TCGA-CS-6290	Male	31	Stable Disease	1	1137	NA	1137	Astroctyoma, IDH mut	G2&G3	Mutant	non-codel	no alteration	no alteration	non-homdel	no alteration	no alteration	no alteration	no alteration	No chr 19/20 gain	No combined CNA	WT	WT	WT	Methylated
TCGA-HT-7609-01A-11R-2090-07	35.9501	5.20751	TCGA-HT-7609	Male	34	Stable Disease	0	1399	0	1399	Astroctyoma, IDH mut	G2&G3	Mutant	non-codel	no alteration	no alteration	non-homdel	no alteration	no alteration	no alteration	no alteration	No chr 19/20 gain	No combined CNA	WT	WT	WT	Methylated
TCGA-TQ-A7RP-01A-21R-A34F-07	170.764	7.42428	TCGA-TQ-A7RP	Male	66	Partial Remission/Response	0	914	0	914	Glioblastoma,IDH WT	G4	WT	non-codel	no alteration	no alteration	non-homdel	no alteration	no alteration	no alteration	no alteration	No chr 19/20 gain	No combined CNA	WT	WT	WT	Methylated
TCGA-DU-6401-01A-11R-1708-07	9.4881	3.39068	TCGA-DU-6401	Female	31	Progressive Disease	1	2660	1	2660	Astroctyoma, IDH mut	G2&G3	Mutant	non-codel	no alteration	no alteration	non-homdel	no alteration	no alteration	no alteration	no alteration	No chr 19/20 gain	No combined CNA	WT	WT	Mutant	Methylated
TCGA-E1-A7YM-01A-11R-A34F-07	140.5	7.14466	TCGA-E1-A7YM	Male	63	Progressive Disease	1	648	1	648	Glioblastoma,IDH WT	G4	WT	non-codel	no alteration	no alteration	non-homdel	no alteration	A289V (driver)	no alteration	no alteration	No chr 19/20 gain	Gain chr 7 & loss chr 10	WT	WT	WT	Unmethylated
TCGA-FG-A6J1-01A-11R-A31N-07	0.8207	0.864493	TCGA-FG-A6J1	Female	44	Stable Disease	0	500	0	500	Oligodendroglioma, IDH mut, 1p/19q-codel	G2&G3	Mutant	codel	no alteration	no alteration	non-homdel	no alteration	no alteration	no alteration	no alteration	No chr 19/20 gain	No combined CNA	WT	WT	WT	Methylated
TCGA-FG-A60J-01A-11R-A28M-07	51.3903	5.71123	TCGA-FG-A60J	Female	47	Complete Remission/Response	0	449	0	449	Astroctyoma, IDH mut	G2&G3	Mutant	non-codel	no alteration	no alteration	non-homdel	no alteration	no alteration	no alteration	no alteration	No chr 19/20 gain	No combined CNA	WT	WT	WT	Methylated
TCGA-FG-6689-01A-11R-1896-07	39.0313	5.32306	TCGA-FG-6689	Male	30	Progressive Disease	0	454	0	454	Astroctyoma, IDH mut	G2&G3	Mutant	non-codel	no alteration	no alteration	non-homdel	no alteration	no alteration	no alteration	no alteration	No chr 19/20 gain	No combined CNA	WT	WT	Mutant	Methylated
TCGA-CS-6670-01A-11R-1896-07	11.1875	3.60733	TCGA-CS-6670	Male	43	[Discrepancy]	0	1426	0	1426	Oligodendroglioma, IDH mut, 1p/19q-codel	G2&G3	Mutant	codel	no alteration	no alteration	non-homdel	no alteration	no alteration	no alteration	no alteration	No chr 19/20 gain	No combined CNA	WT	WT	WT	Methylated
TCGA-DB-A4XA-01A-11R-A26U-07	21.1049	4.46629	TCGA-DB-A4XA	Male	30	Stable Disease	0	573	0	573	Oligodendroglioma, IDH mut, 1p/19q-codel	G2&G3	Mutant	codel	no alteration	no alteration	non-homdel	no alteration	no alteration	no alteration	no alteration	No chr 19/20 gain	No combined CNA	WT	WT	WT	Methylated
TCGA-TM-A7C3-01A-11R-A32Q-07	38.4218	5.30092	TCGA-TM-A7C3	Female	43	Complete Remission/Response	1	1666	1	1666	Glioblastoma,IDH WT	G4	WT	non-codel	no alteration	no alteration	non-homdel	no alteration	A289V (driver), AMP (driver)	no alteration	no alteration	Gain chr 19/20	Gain chr 7 & loss chr 10	WT	WT	WT	Methylated
TCGA-HT-A5RC-01A-11R-A28M-07	144.846	7.1883	TCGA-HT-A5RC	Female	70	Progressive Disease	1	162	1	162	Glioblastoma,IDH WT	G4	WT	non-codel	HOMDEL (driver)	HOMDEL (driver)	homdel	no alteration	G598V (driver), AMP (driver)	no alteration	no alteration	Gain chr 19/20	Gain chr 7 & loss chr 10	WT	WT	WT	Unmethylated
TCGA-E1-A7YJ-01A-11R-A34F-07	83.6038	6.40265	TCGA-E1-A7YJ	Male	55	Stable Disease	1	592	1	592	Glioblastoma,IDH WT	G4	WT	non-codel	HOMDEL (driver)	HOMDEL (driver)	homdel	no alteration	R252C (driver), AMP (driver)	no alteration	no alteration	Gain chr 19/20	Gain chr 7 & loss chr 10	WT	WT	WT	Unmethylated
TCGA-DU-7009-01A-11R-2027-07	49.0614	5.64563	TCGA-DU-7009	Female	32	Progressive Disease	1	4695	1	4695	Oligodendroglioma, IDH mut, 1p/19q-codel	G2&G3	Mutant	codel	no alteration	no alteration	non-homdel	no alteration	no alteration	no alteration	no alteration	No chr 19/20 gain	No combined CNA	WT	WT	WT	Methylated
TCGA-HT-7611-01A-11R-2403-07	48.8065	5.63826	TCGA-HT-7611	Male	36	Complete Remission/Response	0	1752	0	1752	Astroctyoma, IDH mut	G2&G3	Mutant	non-codel	no alteration	no alteration	non-homdel	no alteration	no alteration	no alteration	no alteration	No chr 19/20 gain	No combined CNA	WT	WT	Mutant	Methylated
TCGA-HT-7483-01A-11R-2027-07	10.6222	3.53881	TCGA-HT-7483	Male	14	Complete Remission/Response	0	5255	0	5255	Astroctyoma, IDH mut	G2&G3	Mutant	non-codel	no alteration	no alteration	non-homdel	no alteration	no alteration	no alteration	no alteration	No chr 19/20 gain	No combined CNA	WT	WT	Mutant	Unmethylated
TCGA-RY-A83Z-01A-11R-A36H-07	2.6869	1.88241	TCGA-RY-A83Z	Female	54	Stable Disease	0	301	0	301	Astroctyoma, IDH mut	G4	Mutant	non-codel	HOMDEL (driver)	HOMDEL (driver)	homdel	no alteration	no alteration	no alteration	no alteration	No chr 19/20 gain	No combined CNA	WT	WT	Mutant	Methylated
TCGA-HT-8114-01A-11R-2404-07	33.1602	5.09424	TCGA-HT-8114	Male	36	Complete Remission/Response	0	1040	0	1040	Astroctyoma, IDH mut	G2&G3	Mutant	non-codel	no alteration	no alteration	non-homdel	no alteration	no alteration	no alteration	no alteration	No chr 19/20 gain	No combined CNA	WT	WT	Mutant	Methylated
TCGA-S9-A6WQ-01A-12R-A34F-07	81.4859	6.36608	TCGA-S9-A6WQ	Female	57	Partial Remission/Response	0	428	0	428	Astroctyoma, IDH mut	G2&G3	Mutant	non-codel	no alteration	no alteration	non-homdel	no alteration	no alteration	no alteration	no alteration	No chr 19/20 gain	No combined CNA	WT	WT	Mutant	Methylated
TCGA-WY-A85A-01A-21R-A36H-07	17.5604	4.21416	TCGA-WY-A85A	Male	20	Partial Remission/Response	0	1320	0	1320	Astroctyoma, IDH mut	G2&G3	Mutant	non-codel	no alteration	no alteration	non-homdel	no alteration	no alteration	no alteration	no alteration	No chr 19/20 gain	No combined CNA	WT	WT	Mutant	Methylated
TCGA-FG-7641-01B-11R-2256-07	56.7592	5.85198	TCGA-FG-7641	Male	31	Complete Remission/Response	0	627	0	627	Oligodendroglioma, IDH mut, 1p/19q-codel	G2&G3	Mutant	codel	no alteration	no alteration	non-homdel	no alteration	no alteration	no alteration	no alteration	No chr 19/20 gain	No combined CNA	WT	WT	WT	Methylated
TCGA-DU-6402-01A-11R-1708-07	147.236	7.21175	TCGA-DU-6402	Male	52	Progressive Disease	1	214	1	214	Glioblastoma,IDH WT	G4	WT	non-codel	HOMDEL (driver)	HOMDEL (driver)	homdel	no alteration	no alteration	no alteration	no alteration	No chr 19/20 gain	Gain chr 7 & loss chr 10	WT	WT	WT	Unmethylated
TCGA-DU-A7T8-01A-21R-A34R-07	19.676	4.36989	TCGA-DU-A7T8	Male	35	Stable Disease	1	4229	1	4229	Astroctyoma, IDH mut	G2&G3	Mutant	non-codel	no alteration	no alteration	non-homdel	no alteration	no alteration	no alteration	no alteration	No chr 19/20 gain	No combined CNA	WT	WT	Mutant	Methylated
TCGA-HT-7607-01A-11R-2090-07	53.193	5.76003	TCGA-HT-7607	Female	61	Progressive Disease	1	96	1	96	Oligodendroglioma, IDH mut, 1p/19q-codel	G2&G3	Mutant	codel	no alteration	no alteration	non-homdel	no alteration	no alteration	no alteration	no alteration	No chr 19/20 gain	No combined CNA	WT	WT	WT	Methylated
TCGA-DU-8165-01A-11R-2256-07	41.0635	5.3945	TCGA-DU-8165	Female	60	Stable Disease	0	582	0	582	Glioblastoma,IDH WT	G4	WT	non-codel	no alteration	no alteration	non-homdel	no alteration	no alteration	no alteration	no alteration	No chr 19/20 gain	Gain chr 7 & loss chr 10	WT	WT	WT	Unmethylated
TCGA-DU-A5TU-01A-11R-A28M-07	4.3618	2.42272	TCGA-DU-A5TU	Female	62	Progressive Disease	0	796	0	796	Astroctyoma, IDH mut	G2&G3	Mutant	non-codel	no alteration	no alteration	non-homdel	no alteration	no alteration	no alteration	no alteration	No chr 19/20 gain	No combined CNA	WT	WT	Mutant	Methylated
TCGA-DH-5140-01A-01R-1470-07	20.2822	4.41158	TCGA-DH-5140	Female	38	Progressive Disease	1	607	1	607	Glioblastoma,IDH WT	G4	WT	non-codel	no alteration	no alteration	non-homdel	no alteration	no alteration	no alteration	no alteration	No chr 19/20 gain	No combined CNA	WT	WT	WT	Unmethylated
TCGA-P5-A72X-01A-11R-A32Q-07	11.5507	3.6497	TCGA-P5-A72X	Male	21	Complete Remission/Response	0	403	0	403	Astroctyoma, IDH mut	G2&G3	Mutant	non-codel	no alteration	no alteration	non-homdel	no alteration	no alteration	no alteration	no alteration	No chr 19/20 gain	No combined CNA	WT	WT	WT	Methylated
TCGA-HT-7875-01A-11R-2403-07	8.2336	3.20689	TCGA-HT-7875	Male	56	Stable Disease	0	10	0	10	Oligodendroglioma, IDH mut, 1p/19q-codel	G2&G3	Mutant	codel	no alteration	no alteration	non-homdel	no alteration	no alteration	no alteration	no alteration	No chr 19/20 gain	No combined CNA	WT	WT	WT	Methylated
TCGA-WY-A85E-01A-11R-A36H-07	14.7027	3.97294	TCGA-WY-A85E	Female	48	Partial Remission/Response	0	633	0	633	Astroctyoma, IDH mut	G2&G3	Mutant	non-codel	no alteration	no alteration	non-homdel	no alteration	no alteration	no alteration	no alteration	No chr 19/20 gain	No combined CNA	WT	WT	Mutant	Methylated
TCGA-HT-7475-01A-11R-2027-07	33.8273	5.12215	TCGA-HT-7475	Male	67	Complete Remission/Response	0	530	0	530	Astroctyoma, IDH mut	G2&G3	Mutant	non-codel	no alteration	no alteration	non-homdel	no alteration	no alteration	no alteration	no alteration	No chr 19/20 gain	No combined CNA	WT	WT	Mutant	Methylated
TCGA-CS-4938-01B-11R-1896-07	14.5952	3.96303	TCGA-CS-4938	Female	31	Stable Disease	0	3574	0	3574	Astroctyoma, IDH mut	G2&G3	Mutant	non-codel	no alteration	no alteration	non-homdel	no alteration	no alteration	no alteration	no alteration	No chr 19/20 gain	No combined CNA	WT	WT	Mutant	Unmethylated
TCGA-P5-A5F6-01A-11R-A28M-07	0	0	TCGA-P5-A5F6	Male	26	[Not Available]	0	39	0	39	Glioblastoma,IDH WT	G4	WT	non-codel	no alteration	no alteration	non-homdel	no alteration	no alteration	no alteration	no alteration	No chr 19/20 gain	No combined CNA	WT	WT	WT	Unmethylated
TCGA-P5-A731-01A-11R-A32Q-07	20.1717	4.40407	TCGA-P5-A731	Female	59	[Unknown]	0	274	0	274	Astroctyoma, IDH mut	G2&G3	Mutant	non-codel	no alteration	no alteration	non-homdel	no alteration	no alteration	no alteration	no alteration	No chr 19/20 gain	No combined CNA	WT	WT	WT	Methylated
TCGA-HT-7482-01A-11R-2027-07	88.4827	6.48354	TCGA-HT-7482	Female	18	Partial Remission/Response	0	3253	0	3253	Astroctyoma, IDH mut	G2&G3	Mutant	non-codel	no alteration	no alteration	non-homdel	no alteration	no alteration	no alteration	no alteration	No chr 19/20 gain	No combined CNA	WT	WT	Mutant	Methylated
TCGA-P5-A781-01A-11R-A32Q-07	40.0789	5.36033	TCGA-P5-A781	Female	34	Complete Remission/Response	0	134	0	134	Oligodendroglioma, IDH mut, 1p/19q-codel	G2&G3	Mutant	codel	no alteration	no alteration	non-homdel	no alteration	no alteration	no alteration	no alteration	No chr 19/20 gain	No combined CNA	WT	WT	WT	Methylated
TCGA-TQ-A7RM-01A-11R-A33Z-07	20.284	4.4117	TCGA-TQ-A7RM	Female	41	Partial Remission/Response	0	1116	0	1116	Astroctyoma, IDH mut	G2&G3	Mutant	non-codel	no alteration	no alteration	non-homdel	no alteration	no alteration	no alteration	no alteration	No chr 19/20 gain	Gain chr 7 & loss chr 10	WT	WT	WT	Methylated
TCGA-HT-A5RA-01A-11R-A28M-07	119.694	6.91521	TCGA-HT-A5RA	Female	65	Partial Remission/Response	0	832	0	832	Glioblastoma,IDH WT	G4	WT	non-codel	HOMDEL (driver)	HOMDEL (driver)	homdel	no alteration	AMP (driver)	no alteration	no alteration	No chr 19/20 gain	No combined CNA	WT	WT	WT	Unmethylated
TCGA-TM-A84M-01A-11R-A36H-07	1.0166	1.01192	TCGA-TM-A84M	Male	40	Complete Remission/Response	0	754	0	754	Oligodendroglioma, IDH mut, 1p/19q-codel	G2&G3	Mutant	codel	no alteration	no alteration	non-homdel	no alteration	no alteration	no alteration	no alteration	No chr 19/20 gain	No combined CNA	WT	WT	WT	Methylated
TCGA-HW-7489-01A-11R-2027-07	29.4967	4.93058	TCGA-HW-7489	Male	38	Progressive Disease	1	1262	1	1262	Astroctyoma, IDH mut	G2&G3	Mutant	non-codel	no alteration	no alteration	non-homdel	no alteration	no alteration	no alteration	no alteration	No chr 19/20 gain	No combined CNA	WT	WT	Mutant	Methylated
TCGA-HT-7680-01A-11R-2256-07	21.0873	4.46515	TCGA-HT-7680	Female	32	Stable Disease	0	23	0	23	Glioblastoma,IDH WT	G4	WT	non-codel	no alteration	no alteration	non-homdel	no alteration	no alteration	no alteration	no alteration	No chr 19/20 gain	No combined CNA	WT	WT	WT	Unmethylated
TCGA-TQ-A7RH-01A-12R-A34F-07	21.2616	4.47649	TCGA-TQ-A7RH	Male	39	Partial Remission/Response	0	486	0	486	Astroctyoma, IDH mut	G2&G3	Mutant	non-codel	no alteration	W110* (driver)	non-homdel	no alteration	no alteration	no alteration	no alteration	No chr 19/20 gain	No combined CNA	WT	WT	Mutant	Methylated
TCGA-DU-8162-01A-21R-2256-07	135.049	7.08798	TCGA-DU-8162	Female	61	Progressive Disease	1	444	1	444	Glioblastoma,IDH WT	G4	WT	non-codel	no alteration	no alteration	non-homdel	no alteration	G598V (driver), AMP (driver)	no alteration	no alteration	No chr 19/20 gain	No combined CNA	WT	WT	WT	Unmethylated
TCGA-DU-6395-01A-13R-1708-07	32.6436	5.07226	TCGA-DU-6395	Male	31	Progressive Disease	1	1491	1	1491	Astroctyoma, IDH mut	G2&G3	Mutant	non-codel	no alteration	no alteration	non-homdel	no alteration	no alteration	no alteration	no alteration	No chr 19/20 gain	No combined CNA	WT	WT	Mutant	Methylated
TCGA-FG-A4MU-01B-11R-A28M-07	55.2687	5.81426	TCGA-FG-A4MU	Male	58	[Unknown]	0	326	0	326	Glioblastoma,IDH WT	G4	WT	non-codel	no alteration	no alteration	non-homdel	no alteration	G598V (driver), AMP (driver)	no alteration	no alteration	Gain chr 19/20	Gain chr 7 & loss chr 10	WT	WT	WT	Methylated
TCGA-DH-A669-02A-11R-A31N-07	1.2026	1.13921	TCGA-DH-A669	Male	70	Stable Disease	1	919	0	919	Oligodendroglioma, IDH mut, 1p/19q-codel	G2&G3	Mutant	codel	no alteration	no alteration	non-homdel	no alteration	no alteration	no alteration	no alteration	No chr 19/20 gain	No combined CNA	WT	WT	WT	Methylated
TCGA-FG-A60L-01A-12R-A31N-07	39.8664	5.35284	TCGA-FG-A60L	Female	34	Complete Remission/Response	0	655	0	655	Astroctyoma, IDH mut	G2&G3	Mutant	non-codel	no alteration	no alteration	non-homdel	no alteration	no alteration	no alteration	no alteration	No chr 19/20 gain	No combined CNA	WT	WT	WT	Methylated
TCGA-S9-A7R8-01A-11R-A34R-07	23.3545	4.60612	TCGA-S9-A7R8	Female	44	Progressive Disease	1	961	1	961	Astroctyoma, IDH mut	G2&G3	Mutant	non-codel	no alteration	no alteration	non-homdel	no alteration	no alteration	no alteration	no alteration	No chr 19/20 gain	No combined CNA	WT	WT	Mutant	Methylated
TCGA-S9-A7R1-01A-12R-A34R-07	1.2584	1.1753	TCGA-S9-A7R1	Male	35	Stable Disease	1	5166	1	5166	Oligodendroglioma, IDH mut, 1p/19q-codel	G2&G3	Mutant	codel	no alteration	no alteration	non-homdel	no alteration	no alteration	no alteration	no alteration	No chr 19/20 gain	No combined CNA	WT	WT	WT	Methylated
TCGA-HT-7688-01A-11R-2256-07	56.6791	5.84998	TCGA-HT-7688	Male	59	Complete Remission/Response	0	964	0	964	Astroctyoma, IDH mut	G2&G3	Mutant	non-codel	no alteration	no alteration	non-homdel	no alteration	no alteration	no alteration	no alteration	No chr 19/20 gain	No combined CNA	WT	WT	Mutant	Methylated
TCGA-TQ-A7RI-01A-11R-A33Z-07	43.6934	5.48199	TCGA-TQ-A7RI	Female	37	[Unknown]	0	62	0	62	Oligodendroglioma, IDH mut, 1p/19q-codel	G2&G3	Mutant	codel	no alteration	no alteration	non-homdel	no alteration	no alteration	no alteration	no alteration	No chr 19/20 gain	No combined CNA	WT	WT	WT	Methylated
TCGA-HT-7874-01A-11R-2403-07	75.0659	6.24918	TCGA-HT-7874	Female	41	Complete Remission/Response	0	1130	0	1130	Oligodendroglioma, IDH mut, 1p/19q-codel	G2&G3	Mutant	codel	no alteration	no alteration	non-homdel	no alteration	no alteration	no alteration	no alteration	No chr 19/20 gain	No combined CNA	WT	WT	WT	Methylated
TCGA-F6-A8O3-01A-11R-A36H-07	2.1378	1.64975	TCGA-F6-A8O3	Male	34	Complete Remission/Response	0	7	0	7	Oligodendroglioma, IDH mut, 1p/19q-codel	G2&G3	Mutant	codel	no alteration	no alteration	non-homdel	no alteration	no alteration	no alteration	no alteration	No chr 19/20 gain	No combined CNA	WT	WT	WT	Methylated
TCGA-DU-7301-01A-11R-2090-07	99.8907	6.65665	TCGA-DU-7301	Male	53	Progressive Disease	1	788	1	788	Astroctyoma, IDH mut	G2&G3	Mutant	non-codel	no alteration	no alteration	non-homdel	no alteration	no alteration	no alteration	no alteration	No chr 19/20 gain	No combined CNA	WT	WT	Mutant	Methylated
TCGA-TM-A7C5-01A-11R-A32Q-07	1.0334	1.02389	TCGA-TM-A7C5	Male	30	Complete Remission/Response	0	1500	0	1500	Oligodendroglioma, IDH mut, 1p/19q-codel	G2&G3	Mutant	codel	no alteration	no alteration	non-homdel	no alteration	no alteration	no alteration	no alteration	No chr 19/20 gain	No combined CNA	WT	WT	WT	Methylated
TCGA-DB-5279-01A-03R-2347-07	1.9378	1.55474	TCGA-DB-5279	Male	59	Complete Remission/Response	0	1354	0	1354	Oligodendroglioma, IDH mut, 1p/19q-codel	G2&G3	Mutant	codel	no alteration	no alteration	non-homdel	no alteration	no alteration	no alteration	no alteration	No chr 19/20 gain	No combined CNA	WT	WT	WT	Methylated
TCGA-DH-A7US-01A-11R-A33Z-07	62.9259	5.99833	TCGA-DH-A7US	Male	50	Stable Disease	0	706	0	706	Oligodendroglioma, IDH mut, 1p/19q-codel	G2&G3	Mutant	codel	no alteration	no alteration	non-homdel	no alteration	no alteration	no alteration	no alteration	No chr 19/20 gain	No combined CNA	WT	WT	WT	Methylated
TCGA-P5-A5EZ-01A-11R-A27Q-07	47.2629	5.59284	TCGA-P5-A5EZ	Male	39	[Not Available]	0	70	0	70	Astroctyoma, IDH mut	G2&G3	Mutant	non-codel	no alteration	no alteration	non-homdel	no alteration	no alteration	no alteration	no alteration	No chr 19/20 gain	No combined CNA	WT	WT	WT	Methylated
TCGA-DB-A64Q-01A-11R-A29R-07	24.054	4.64697	TCGA-DB-A64Q	Female	31	Stable Disease	0	182	0	182	Oligodendroglioma, IDH mut, 1p/19q-codel	G2&G3	Mutant	codel	no alteration	no alteration	non-homdel	no alteration	no alteration	no alteration	no alteration	No chr 19/20 gain	No combined CNA	WT	WT	WT	Methylated
TCGA-S9-A7R2-01A-21R-A34R-07	109.616	6.78941	TCGA-S9-A7R2	Male	69	Progressive Disease	1	316	1	316	Glioblastoma,IDH WT	G4	WT	non-codel	no alteration	no alteration	non-homdel	no alteration	L62R (driver)	no alteration	no alteration	No chr 19/20 gain	Gain chr 7 & loss chr 10	WT	WT	WT	Unmethylated
TCGA-E1-A7YL-01A-11R-A34F-07	42.3418	5.43769	TCGA-E1-A7YL	Male	46	Progressive Disease	1	492	1	492	Glioblastoma,IDH WT	G4	WT	non-codel	no alteration	no alteration	non-homdel	no alteration	no alteration	no alteration	no alteration	Gain chr 19/20	Gain chr 7 & loss chr 10	WT	WT	WT	Unmethylated
TCGA-DH-A7UU-01A-12R-A34F-07	13.98	3.90497	TCGA-DH-A7UU	Male	43	Stable Disease	0	417	0	417	Astroctyoma, IDH mut	G2&G3	Mutant	non-codel	no alteration	no alteration	non-homdel	no alteration	no alteration	no alteration	no alteration	No chr 19/20 gain	No combined CNA	WT	WT	WT	Methylated
TCGA-CS-4943-01A-01R-1470-07	20.797	4.44606	TCGA-CS-4943	Male	37	[Not Available]	1	1106	1	1106	Astroctyoma, IDH mut	G4	Mutant	non-codel	HOMDEL (driver)	P48R (driver), HOMDEL (driver)	homdel	no alteration	no alteration	no alteration	no alteration	No chr 19/20 gain	No combined CNA	WT	WT	Mutant	Methylated
TCGA-CS-5394-01A-01R-1470-07	1.0925	1.06523	TCGA-CS-5394	Male	40	[Unknown]	0	8	0	8	Astroctyoma, IDH mut	G2&G3	Mutant	non-codel	no alteration	no alteration	non-homdel	no alteration	no alteration	no alteration	no alteration	No chr 19/20 gain	No combined CNA	WT	WT	WT	Methylated
TCGA-HT-8019-01A-21R-2404-07	24.6985	4.68361	TCGA-HT-8019	Female	34	Complete Remission/Response	0	1004	0	1004	Glioblastoma,IDH WT	G4	WT	non-codel	no alteration	no alteration	non-homdel	no alteration	no alteration	no alteration	no alteration	No chr 19/20 gain	No combined CNA	WT	WT	WT	Unmethylated
TCGA-E1-A7Z2-01A-21R-A34R-07	45.7757	5.54769	TCGA-E1-A7Z2	Female	58	Progressive Disease	1	398	1	398	Glioblastoma,IDH WT	G4	WT	non-codel	no alteration	no alteration	non-homdel	no alteration	L62R (driver)	no alteration	no alteration	No chr 19/20 gain	Gain chr 7 & loss chr 10	WT	WT	WT	Unmethylated
TCGA-DB-A64U-01A-11R-A29R-07	116.488	6.87637	TCGA-DB-A64U	Female	38	Complete Remission/Response	0	846	0	846	Oligodendroglioma, IDH mut, 1p/19q-codel	G2&G3	Mutant	codel	no alteration	no alteration	non-homdel	no alteration	no alteration	no alteration	no alteration	No chr 19/20 gain	No combined CNA	WT	WT	WT	Methylated
TCGA-DU-5852-01A-11R-1708-07	37.3388	5.26073	TCGA-DU-5852	Female	61	Progressive Disease	1	205	1	205	Glioblastoma,IDH WT	G4	WT	non-codel	HOMDEL (driver)	HOMDEL (driver)	homdel	no alteration	R252C (driver), AMP (driver)	no alteration	no alteration	No chr 19/20 gain	No combined CNA	WT	WT	Mutant	Methylated
TCGA-TM-A84L-01A-11R-A36H-07	53.3753	5.76488	TCGA-TM-A84L	Male	31	Complete Remission/Response	1	1242	1	1242	Astroctyoma, IDH mut	G2&G3	Mutant	non-codel	no alteration	no alteration	non-homdel	no alteration	no alteration	no alteration	no alteration	No chr 19/20 gain	No combined CNA	WT	WT	Mutant	Methylated
TCGA-S9-A6U0-01A-12R-A32Q-07	86.8818	6.45749	TCGA-S9-A6U0	Male	46	Partial Remission/Response	1	742	1	742	Glioblastoma,IDH WT	G4	WT	non-codel	HOMDEL (driver)	HOMDEL (driver)	homdel	no alteration	AMP (driver)	no alteration	no alteration	No chr 19/20 gain	Gain chr 7 & loss chr 10	WT	WT	WT	Methylated
TCGA-HT-8558-01A-21R-2404-07	173.196	7.44457	TCGA-HT-8558	Female	29	Complete Remission/Response	0	418	0	418	Glioblastoma,IDH WT	G4	WT	non-codel	no alteration	no alteration	non-homdel	no alteration	no alteration	no alteration	no alteration	NA	NA	WT	WT	WT	Unmethylated
TCGA-P5-A735-01A-11R-A32Q-07	26.4523	4.77886	TCGA-P5-A735	Female	38	Complete Remission/Response	0	292	0	292	Astroctyoma, IDH mut	G2&G3	Mutant	non-codel	no alteration	no alteration	non-homdel	no alteration	no alteration	no alteration	no alteration	No chr 19/20 gain	No combined CNA	WT	WT	Mutant	Methylated
TCGA-DU-A6S8-01A-12R-A32Q-07	8.0143	3.17222	TCGA-DU-A6S8	Female	74	Progressive Disease	0	678	0	678	Oligodendroglioma, IDH mut, 1p/19q-codel	G2&G3	Mutant	codel	HOMDEL (driver)	HOMDEL (driver)	homdel	no alteration	no alteration	no alteration	no alteration	No chr 19/20 gain	No combined CNA	WT	WT	WT	Methylated
TCGA-HT-A74K-01A-11R-A32Q-07	18.7967	4.30719	TCGA-HT-A74K	Female	58	Complete Remission/Response	0	467	0	467	Oligodendroglioma, IDH mut, 1p/19q-codel	G2&G3	Mutant	codel	no alteration	no alteration	non-homdel	no alteration	no alteration	no alteration	no alteration	No chr 19/20 gain	No combined CNA	WT	WT	WT	Methylated
TCGA-E1-5305-01A-01R-1896-07	28.3311	4.87436	TCGA-E1-5305	Male	34	Stable Disease	1	2433	1	2433	Astroctyoma, IDH mut	G2&G3	Mutant	non-codel	no alteration	no alteration	non-homdel	no alteration	no alteration	no alteration	no alteration	No chr 19/20 gain	No combined CNA	WT	WT	Mutant	Methylated
TCGA-HT-A618-01A-11R-A29R-07	19.5219	4.35909	TCGA-HT-A618	Female	37	Complete Remission/Response	0	512	0	512	Astroctyoma, IDH mut	G2&G3	Mutant	non-codel	no alteration	no alteration	non-homdel	no alteration	no alteration	no alteration	no alteration	No chr 19/20 gain	No combined CNA	WT	WT	Mutant	Methylated
TCGA-S9-A6WG-01A-11R-A33Z-07	6.4927	2.90549	TCGA-S9-A6WG	Male	31	Progressive Disease	0	2602	0	2602	Astroctyoma, IDH mut	G2&G3	Mutant	non-codel	no alteration	no alteration	non-homdel	no alteration	no alteration	no alteration	no alteration	No chr 19/20 gain	No combined CNA	WT	WT	Mutant	Methylated
TCGA-S9-A7IX-01A-12R-A34F-07	50.225	5.67878	TCGA-S9-A7IX	Male	57	Progressive Disease	1	819	1	819	Glioblastoma,IDH WT	G4	WT	non-codel	HOMDEL (driver)	HOMDEL (driver)	homdel	no alteration	L62R (driver), AMP (driver)	no alteration	no alteration	No chr 19/20 gain	Gain chr 7 & loss chr 10	WT	WT	WT	Unmethylated
TCGA-S9-A6WO-01A-21R-A34F-07	19.8008	4.37857	TCGA-S9-A6WO	Male	29	Progressive Disease	0	566	0	566	Astroctyoma, IDH mut	G2&G3	Mutant	non-codel	no alteration	no alteration	non-homdel	no alteration	no alteration	no alteration	no alteration	No chr 19/20 gain	No combined CNA	WT	WT	Mutant	Methylated
TCGA-HW-7491-01A-11R-2027-07	12.8452	3.79131	TCGA-HW-7491	Male	35	Progressive Disease	0	2078	0	2078	Oligodendroglioma, IDH mut, 1p/19q-codel	G2&G3	Mutant	codel	no alteration	no alteration	non-homdel	no alteration	no alteration	no alteration	no alteration	No chr 19/20 gain	No combined CNA	WT	WT	WT	Unmethylated
TCGA-S9-A7R7-01A-11R-A34R-07	27.4886	4.83231	TCGA-S9-A7R7	Male	27	Progressive Disease	0	3000	0	3000	Astroctyoma, IDH mut	G2&G3	Mutant	non-codel	no alteration	no alteration	non-homdel	no alteration	no alteration	no alteration	no alteration	No chr 19/20 gain	No combined CNA	WT	WT	Mutant	Methylated
TCGA-HT-7479-01A-11R-2027-07	101.532	6.67993	TCGA-HT-7479	Male	44	Complete Remission/Response	0	1227	0	1227	Astroctyoma, IDH mut	G2&G3	Mutant	non-codel	no alteration	no alteration	non-homdel	no alteration	no alteration	no alteration	no alteration	No chr 19/20 gain	No combined CNA	WT	WT	WT	Methylated
TCGA-E1-5307-01A-01R-1896-07	18.1501	4.25928	TCGA-E1-5307	Female	62	Stable Disease	1	1762	1	1762	Astroctyoma, IDH mut	G2&G3	Mutant	non-codel	no alteration	no alteration	non-homdel	no alteration	no alteration	no alteration	no alteration	No chr 19/20 gain	No combined CNA	WT	WT	Mutant	Methylated
TCGA-HT-7616-01A-11R-2256-07	7.9584	3.16324	TCGA-HT-7616	Male	75	Progressive Disease	1	7	1	7	Oligodendroglioma, IDH mut, 1p/19q-codel	G2&G3	Mutant	codel	no alteration	no alteration	non-homdel	no alteration	no alteration	no alteration	no alteration	No chr 19/20 gain	No combined CNA	WT	WT	WT	Methylated
TCGA-CS-6667-01A-12R-2027-07	4.785	2.53232	TCGA-CS-6667	Female	39	Stable Disease	0	1469	0	1469	Astroctyoma, IDH mut	G2&G3	Mutant	non-codel	no alteration	no alteration	non-homdel	no alteration	no alteration	no alteration	no alteration	No chr 19/20 gain	No combined CNA	WT	WT	WT	Methylated
TCGA-CS-5396-01A-02R-1470-07	55.6974	5.82521	TCGA-CS-5396	Female	53	Partial Remission/Response	0	1631	0	1631	Oligodendroglioma, IDH mut, 1p/19q-codel	G2&G3	Mutant	codel	no alteration	no alteration	non-homdel	no alteration	no alteration	no alteration	no alteration	No chr 19/20 gain	No combined CNA	WT	WT	WT	Methylated
TCGA-DU-8158-01A-11R-2256-07	84.2882	6.41427	TCGA-DU-8158	Female	57	[Not Available]	1	155	1	155	Glioblastoma,IDH WT	G4	WT	non-codel	HOMDEL (driver)	HOMDEL (driver)	homdel	no alteration	E84V	no alteration	no alteration	No chr 19/20 gain	No combined CNA	WT	WT	WT	Unmethylated
TCGA-DU-8161-01A-11R-2256-07	181.143	7.50893	TCGA-DU-8161	Female	63	Progressive Disease	1	722	1	722	Glioblastoma,IDH WT	G4	WT	non-codel	no alteration	no alteration	non-homdel	no alteration	no alteration	no alteration	no alteration	No chr 19/20 gain	Gain chr 7 & loss chr 10	WT	WT	WT	Unmethylated
TCGA-DB-A75L-01A-11R-A32Q-07	14.6562	3.96866	TCGA-DB-A75L	Female	36	Complete Remission/Response	0	342	0	342	Astroctyoma, IDH mut	G2&G3	Mutant	non-codel	no alteration	no alteration	non-homdel	no alteration	no alteration	no alteration	no alteration	No chr 19/20 gain	No combined CNA	WT	WT	WT	Methylated
TCGA-CS-5397-01A-01R-1896-07	78.2812	6.30891	TCGA-CS-5397	Female	54	Progressive Disease	1	194	1	194	Glioblastoma,IDH WT	G4	WT	non-codel	HOMDEL (driver)	HOMDEL (driver)	homdel	no alteration	no alteration	no alteration	no alteration	No chr 19/20 gain	Gain chr 7 & loss chr 10	WT	WT	WT	Unmethylated
TCGA-TQ-A7RN-01A-11R-A33Z-07	10.0502	3.466	TCGA-TQ-A7RN	Male	32	Partial Remission/Response	0	1026	0	1026	Oligodendroglioma, IDH mut, 1p/19q-codel	G2&G3	Mutant	codel	no alteration	no alteration	non-homdel	no alteration	no alteration	no alteration	no alteration	No chr 19/20 gain	No combined CNA	WT	WT	WT	Methylated
TCGA-DB-5275-01A-01R-1470-07	11.7269	3.66981	TCGA-DB-5275	Male	36	Complete Remission/Response	0	1458	0	1458	Astroctyoma, IDH mut	G2&G3	Mutant	non-codel	no alteration	no alteration	non-homdel	no alteration	no alteration	no alteration	no alteration	No chr 19/20 gain	No combined CNA	WT	WT	Mutant	Methylated
TCGA-HW-8319-01A-11R-2404-07	29.0097	4.90736	TCGA-HW-8319	Female	34	Partial Remission/Response	1	1209	1	1209	Astroctyoma, IDH mut	G2&G3	Mutant	non-codel	no alteration	no alteration	non-homdel	no alteration	no alteration	no alteration	no alteration	No chr 19/20 gain	No combined CNA	WT	WT	Mutant	Unmethylated
TCGA-R8-A6YH-01A-21R-A32Q-07	17.0344	4.17268	TCGA-R8-A6YH	NA	NA	NA	NA	NA	NA	NA	Astroctyoma, IDH mut	G2&G3	Mutant	non-codel	no alteration	no alteration	non-homdel	no alteration	no alteration	no alteration	no alteration	No chr 19/20 gain	No combined CNA	WT	WT	Mutant	Unmethylated
TCGA-DU-8163-01A-11R-2256-07	64.6734	6.03724	TCGA-DU-8163	Male	29	Progressive Disease	0	629	0	629	Astroctyoma, IDH mut	G2&G3	Mutant	non-codel	no alteration	no alteration	non-homdel	no alteration	no alteration	no alteration	no alteration	No chr 19/20 gain	No combined CNA	WT	WT	Mutant	Unmethylated
TCGA-VM-A8CA-01A-11R-A36H-07	2.6532	1.86916	TCGA-VM-A8CA	Male	54	[Unknown]	0	411	0	411	Astroctyoma, IDH mut	G2&G3	Mutant	non-codel	no alteration	no alteration	non-homdel	no alteration	no alteration	no alteration	no alteration	No chr 19/20 gain	No combined CNA	WT	WT	WT	Methylated
TCGA-WY-A858-01A-11R-A36H-07	16.7153	4.14692	TCGA-WY-A858	Female	32	Complete Remission/Response	0	1337	0	1337	Astroctyoma, IDH mut	G2&G3	Mutant	non-codel	no alteration	no alteration	non-homdel	no alteration	no alteration	no alteration	no alteration	No chr 19/20 gain	No combined CNA	WT	WT	Mutant	Methylated
TCGA-HT-7879-01A-11R-2403-07	45.4044	5.53619	TCGA-HT-7879	Male	31	Complete Remission/Response	0	112	0	112	Astroctyoma, IDH mut	G2&G3	Mutant	non-codel	no alteration	no alteration	non-homdel	no alteration	no alteration	no alteration	no alteration	No chr 19/20 gain	No combined CNA	WT	WT	Mutant	Methylated
TCGA-S9-A6WL-01A-21R-A33Z-07	5.8065	2.76691	TCGA-S9-A6WL	Male	52	Progressive Disease	0	946	0	946	Oligodendroglioma, IDH mut, 1p/19q-codel	G2&G3	Mutant	codel	no alteration	no alteration	non-homdel	no alteration	no alteration	no alteration	no alteration	No chr 19/20 gain	No combined CNA	WT	WT	WT	Methylated
TCGA-DU-7309-01A-11R-2090-07	14.3691	3.94196	TCGA-DU-7309	Female	41	Stable Disease	0	84	0	84	Astroctyoma, IDH mut	G2&G3	Mutant	non-codel	no alteration	no alteration	non-homdel	no alteration	no alteration	no alteration	no alteration	No chr 19/20 gain	No combined CNA	WT	WT	Mutant	Methylated
TCGA-TQ-A7RO-01A-11R-A33Z-07	19.7066	4.37202	TCGA-TQ-A7RO	Male	29	Partial Remission/Response	0	949	0	949	Oligodendroglioma, IDH mut, 1p/19q-codel	G2&G3	Mutant	codel	no alteration	no alteration	non-homdel	no alteration	no alteration	no alteration	no alteration	No chr 19/20 gain	No combined CNA	WT	WT	WT	Methylated
TCGA-DH-5143-01A-01R-1470-07	19.5936	4.36412	TCGA-DH-5143	Male	30	Stable Disease	0	1401	0	1401	Astroctyoma, IDH mut	G2&G3	Mutant	non-codel	no alteration	no alteration	non-homdel	no alteration	no alteration	no alteration	no alteration	No chr 19/20 gain	No combined CNA	WT	WT	WT	Methylated
TCGA-FG-8186-01A-11R-2256-07	20.5468	4.4294	TCGA-FG-8186	Female	42	Stable Disease	0	487	0	487	Oligodendroglioma, IDH mut, 1p/19q-codel	G2&G3	Mutant	codel	no alteration	no alteration	non-homdel	no alteration	no alteration	no alteration	no alteration	No chr 19/20 gain	No combined CNA	WT	WT	WT	Methylated
TCGA-FG-6688-01A-11R-1896-07	82.2025	6.37855	TCGA-FG-6688	Female	59	Progressive Disease	0	571	0	571	Glioblastoma,IDH WT	G4	WT	non-codel	no alteration	no alteration	non-homdel	no alteration	AMP (driver)	no alteration	no alteration	No chr 19/20 gain	Gain chr 7 & loss chr 10	WT	WT	WT	Methylated
TCGA-DU-5871-01A-12R-1708-07	10.4084	3.51202	TCGA-DU-5871	Female	37	Stable Disease	0	576	0	576	Astroctyoma, IDH mut	G2&G3	Mutant	non-codel	no alteration	no alteration	non-homdel	no alteration	no alteration	no alteration	no alteration	No chr 19/20 gain	No combined CNA	WT	WT	Mutant	Methylated
TCGA-FG-A4MT-02A-11R-A29R-07	27.8148	4.84874	TCGA-FG-A4MT	Female	27	Complete Remission/Response	0	1164	0	1164	Astroctyoma, IDH mut	G2&G3	Mutant	non-codel	no alteration	no alteration	non-homdel	no alteration	no alteration	no alteration	no alteration	No chr 19/20 gain	No combined CNA	WT	WT	Mutant	Methylated
TCGA-S9-A6TY-01A-12R-A32Q-07	18.9221	4.3163	TCGA-S9-A6TY	Male	50	Partial Remission/Response	0	1076	0	1076	Oligodendroglioma, IDH mut, 1p/19q-codel	G2&G3	Mutant	codel	no alteration	no alteration	non-homdel	no alteration	no alteration	no alteration	no alteration	No chr 19/20 gain	No combined CNA	WT	WT	WT	Methylated
TCGA-DU-A7TD-01A-12R-A34F-07	9.5076	3.39336	TCGA-DU-A7TD	Male	52	Progressive Disease	1	228	1	228	Glioblastoma,IDH WT	G4	WT	non-codel	HOMDEL (driver)	HOMDEL (driver)	homdel	no alteration	Q276L, AMP (driver)	no alteration	no alteration	No chr 19/20 gain	Gain chr 7 & loss chr 10	WT	WT	WT	Unmethylated
TCGA-HT-A617-01A-11R-A29R-07	67.6999	6.10224	TCGA-HT-A617	Male	47	Progressive Disease	0	491	0	491	Glioblastoma,IDH WT	G4	WT	non-codel	no alteration	no alteration	non-homdel	no alteration	no alteration	no alteration	no alteration	No chr 19/20 gain	Gain chr 7 & loss chr 10	WT	WT	WT	Unmethylated
TCGA-HT-7601-01A-11R-2090-07	105.571	6.73568	TCGA-HT-7601	Female	30	Partial Remission/Response	0	153	0	153	Astroctyoma, IDH mut	G2&G3	Mutant	non-codel	no alteration	no alteration	non-homdel	no alteration	no alteration	no alteration	no alteration	No chr 19/20 gain	No combined CNA	WT	WT	WT	Methylated
TCGA-HT-A5R9-01A-11R-A28M-07	1.7382	1.45323	TCGA-HT-A5R9	Female	48	[Not Available]	0	2	0	2	Oligodendroglioma, IDH mut, 1p/19q-codel	G2&G3	Mutant	codel	no alteration	no alteration	non-homdel	no alteration	no alteration	no alteration	no alteration	No chr 19/20 gain	No combined CNA	WT	WT	WT	Methylated
TCGA-HT-8013-01A-11R-2403-07	40.962	5.39101	TCGA-HT-8013	Female	37	Stable Disease	1	1933	1	1933	Astroctyoma, IDH mut	G2&G3	Mutant	non-codel	no alteration	no alteration	non-homdel	no alteration	no alteration	no alteration	no alteration	No chr 19/20 gain	No combined CNA	WT	WT	Mutant	Methylated
TCGA-CS-5393-01A-01R-1470-07	40.5692	5.37744	TCGA-CS-5393	Male	39	Complete Remission/Response	0	1222	0	1222	Astroctyoma, IDH mut	G2&G3	Mutant	non-codel	no alteration	no alteration	non-homdel	no alteration	AMP (driver)	no alteration	no alteration	No chr 19/20 gain	No combined CNA	WT	WT	WT	Methylated
TCGA-DU-6397-01A-11R-1708-07	18.4078	4.27856	TCGA-DU-6397	Male	45	Progressive Disease	1	1401	1	1401	Oligodendroglioma, IDH mut, 1p/19q-codel	G2&G3	Mutant	codel	no alteration	no alteration	non-homdel	no alteration	no alteration	no alteration	no alteration	No chr 19/20 gain	No combined CNA	WT	WT	WT	Methylated
TCGA-S9-A6UA-01A-12R-A33Z-07	24.1971	4.65519	TCGA-S9-A6UA	Male	66	Progressive Disease	1	178	1	178	Glioblastoma,IDH WT	G4	WT	non-codel	HOMDEL (driver)	HOMDEL (driver)	homdel	no alteration	no alteration	no alteration	no alteration	No chr 19/20 gain	No combined CNA	WT	WT	Mutant	Methylated
TCGA-DU-7015-01A-11R-2027-07	11.2806	3.61831	TCGA-DU-7015	Female	41	Progressive Disease	0	2761	0	2761	Astroctyoma, IDH mut	G2&G3	Mutant	non-codel	no alteration	no alteration	non-homdel	no alteration	no alteration	no alteration	no alteration	No chr 19/20 gain	No combined CNA	WT	WT	Mutant	Methylated
TCGA-DU-8164-01A-11R-2256-07	8.5721	3.25884	TCGA-DU-8164	Male	51	Stable Disease	0	651	0	651	Oligodendroglioma, IDH mut, 1p/19q-codel	G2&G3	Mutant	codel	no alteration	no alteration	non-homdel	no alteration	no alteration	no alteration	no alteration	No chr 19/20 gain	No combined CNA	WT	WT	WT	Methylated
TCGA-FG-8185-01A-11R-2256-07	8.5884	3.26129	TCGA-FG-8185	Male	37	Complete Remission/Response	0	433	0	433	Astroctyoma, IDH mut	G2&G3	Mutant	non-codel	no alteration	no alteration	non-homdel	no alteration	no alteration	no alteration	no alteration	No chr 19/20 gain	No combined CNA	WT	WT	Mutant	Methylated
TCGA-P5-A77W-01A-11R-A32Q-07	8.3582	3.22623	TCGA-P5-A77W	Female	37	Complete Remission/Response	0	584	0	584	Oligodendroglioma, IDH mut, 1p/19q-codel	G2&G3	Mutant	codel	no alteration	no alteration	non-homdel	no alteration	no alteration	no alteration	no alteration	No chr 19/20 gain	No combined CNA	WT	WT	WT	Methylated
TCGA-HT-8564-01A-11R-2404-07	85.7749	6.43921	TCGA-HT-8564	Male	47	Progressive Disease	0	478	0	478	Glioblastoma,IDH WT	G4	WT	non-codel	no alteration	no alteration	non-homdel	no alteration	no alteration	no alteration	no alteration	No chr 19/20 gain	No combined CNA	WT	WT	WT	Unmethylated
TCGA-WY-A85C-01A-11R-A36H-07	2.5745	1.83774	TCGA-WY-A85C	Male	36	Progressive Disease	0	1426	0	1426	Astroctyoma, IDH mut	G2&G3	Mutant	non-codel	no alteration	no alteration	non-homdel	no alteration	no alteration	no alteration	no alteration	No chr 19/20 gain	No combined CNA	WT	WT	WT	Methylated
TCGA-S9-A7IS-01A-11R-A34F-07	38.4921	5.30349	TCGA-S9-A7IS	Female	33	Progressive Disease	1	241	1	241	Astroctyoma, IDH mut	G4	Mutant	non-codel	HOMDEL (driver)	HOMDEL (driver)	homdel	no alteration	no alteration	no alteration	no alteration	No chr 19/20 gain	No combined CNA	WT	WT	Mutant	Methylated
TCGA-DU-6392-01A-11R-1708-07	21.4449	4.48832	TCGA-DU-6392	Female	35	Progressive Disease	0	6423	0	6423	Glioblastoma,IDH WT	G4	WT	non-codel	no alteration	no alteration	non-homdel	no alteration	no alteration	no alteration	no alteration	No chr 19/20 gain	No combined CNA	WT	WT	Mutant	Unmethylated
TCGA-HT-A74H-01A-11R-A32Q-07	69.2026	6.13345	TCGA-HT-A74H	Male	62	Stable Disease	0	74	0	74	Glioblastoma,IDH WT	G4	WT	non-codel	no alteration	no alteration	non-homdel	no alteration	no alteration	no alteration	no alteration	No chr 19/20 gain	Gain chr 7 & loss chr 10	WT	WT	WT	Unmethylated
TCGA-HT-7608-01A-11R-2090-07	8.3869	3.23065	TCGA-HT-7608	Male	61	Stable Disease	0	671	0	671	Oligodendroglioma, IDH mut, 1p/19q-codel	G2&G3	Mutant	codel	no alteration	no alteration	non-homdel	no alteration	no alteration	no alteration	no alteration	No chr 19/20 gain	No combined CNA	WT	WT	WT	Methylated
TCGA-DB-A64R-01A-11R-A29R-07	4.7869	2.53279	TCGA-DB-A64R	Female	24	Complete Remission/Response	0	955	0	955	Oligodendroglioma, IDH mut, 1p/19q-codel	G2&G3	Mutant	codel	no alteration	no alteration	non-homdel	no alteration	no alteration	no alteration	no alteration	No chr 19/20 gain	No combined CNA	WT	WT	WT	Methylated
TCGA-HW-8320-01A-11R-2404-07	8.7429	3.28435	TCGA-HW-8320	Male	36	Stable Disease	0	1217	0	1217	Astroctyoma, IDH mut	G2&G3	Mutant	non-codel	no alteration	no alteration	non-homdel	no alteration	no alteration	no alteration	no alteration	No chr 19/20 gain	No combined CNA	WT	WT	WT	Methylated
TCGA-S9-A7R3-01A-11R-A34R-07	27.7345	4.84471	TCGA-S9-A7R3	Female	28	Partial Remission/Response	0	3013	0	3013	Astroctyoma, IDH mut	G2&G3	Mutant	non-codel	no alteration	no alteration	non-homdel	no alteration	no alteration	no alteration	no alteration	No chr 19/20 gain	No combined CNA	WT	WT	WT	Methylated
TCGA-CS-4942-01A-01R-1470-07	54.2502	5.78791	TCGA-CS-4942	Female	44	Progressive Disease	1	1335	1	1335	Astroctyoma, IDH mut	G2&G3	Mutant	non-codel	no alteration	no alteration	non-homdel	no alteration	no alteration	no alteration	no alteration	No chr 19/20 gain	No combined CNA	WT	WT	Mutant	Unmethylated
TCGA-KT-A74X-01A-11R-A32Q-07	15.1437	4.0129	TCGA-KT-A74X	Male	26	Stable Disease	0	438	0	438	Oligodendroglioma, IDH mut, 1p/19q-codel	G2&G3	Mutant	codel	no alteration	no alteration	non-homdel	no alteration	no alteration	no alteration	no alteration	No chr 19/20 gain	No combined CNA	WT	WT	WT	Methylated
TCGA-HT-7882-01A-11R-2403-07	23.2867	4.60209	TCGA-HT-7882	Male	66	Progressive Disease	1	113	1	113	Glioblastoma,IDH WT	G4	WT	non-codel	no alteration	no alteration	non-homdel	no alteration	no alteration	no alteration	no alteration	No chr 19/20 gain	No combined CNA	WT	WT	WT	Methylated
TCGA-DU-A5TW-01A-11R-A28M-07	18.5003	4.28542	TCGA-DU-A5TW	Female	33	Progressive Disease	0	760	0	760	Astroctyoma, IDH mut	G2&G3	Mutant	non-codel	no alteration	no alteration	non-homdel	no alteration	no alteration	no alteration	no alteration	No chr 19/20 gain	No combined CNA	WT	WT	Mutant	Methylated
TCGA-DU-8166-01A-11R-2256-07	34.4141	5.14625	TCGA-DU-8166	Female	29	Progressive Disease	0	516	0	516	Astroctyoma, IDH mut	G2&G3	Mutant	non-codel	no alteration	no alteration	non-homdel	no alteration	no alteration	no alteration	no alteration	No chr 19/20 gain	No combined CNA	WT	WT	Mutant	Methylated
TCGA-CS-5395-01A-01R-1470-07	43.7815	5.48483	TCGA-CS-5395	Male	43	Progressive Disease	1	639	1	639	Glioblastoma,IDH WT	G4	WT	non-codel	HOMDEL (driver)	HOMDEL (driver)	homdel	no alteration	no alteration	no alteration	no alteration	Gain chr 19/20	Gain chr 7 & loss chr 10	WT	WT	WT	Unmethylated
TCGA-HT-A4DV-01A-11R-A26U-07	185.669	7.54434	TCGA-HT-A4DV	Female	51	Complete Remission/Response	0	792	0	792	Oligodendroglioma, IDH mut, 1p/19q-codel	G2&G3	Mutant	codel	no alteration	no alteration	non-homdel	no alteration	no alteration	no alteration	no alteration	No chr 19/20 gain	No combined CNA	WT	WT	WT	Methylated
TCGA-CS-6669-01A-11R-1896-07	37.6362	5.27188	TCGA-CS-6669	Female	26	Stable Disease	0	1494	0	1494	Glioblastoma,IDH WT	G4	WT	non-codel	no alteration	no alteration	non-homdel	no alteration	no alteration	no alteration	no alteration	No chr 19/20 gain	No combined CNA	WT	WT	WT	Unmethylated
TCGA-P5-A72Z-01A-11R-A32Q-07	8.8535	3.30064	TCGA-P5-A72Z	Female	64	Complete Remission/Response	0	354	0	354	Oligodendroglioma, IDH mut, 1p/19q-codel	G2&G3	Mutant	codel	no alteration	no alteration	non-homdel	no alteration	no alteration	no alteration	no alteration	No chr 19/20 gain	No combined CNA	WT	WT	WT	Methylated
TCGA-E1-A7YS-01A-11R-A34F-07	13.3009	3.83803	TCGA-E1-A7YS	Male	71	Stable Disease	1	466	1	466	Oligodendroglioma, IDH mut, 1p/19q-codel	G2&G3	Mutant	codel	no alteration	no alteration	non-homdel	no alteration	no alteration	no alteration	no alteration	No chr 19/20 gain	No combined CNA	WT	WT	WT	Methylated
TCGA-KT-A7W1-01A-11R-A34F-07	38.7599	5.31324	TCGA-KT-A7W1	Female	45	Progressive Disease	0	438	0	438	Glioblastoma,IDH WT	G4	WT	non-codel	HOMDEL (driver)	HOMDEL (driver)	homdel	no alteration	G719D (driver), E709K (driver), AMP (driver)	no alteration	no alteration	No chr 19/20 gain	Gain chr 7 & loss chr 10	WT	WT	WT	Methylated
TCGA-HT-7604-01A-11R-2090-07	15.3378	4.03014	TCGA-HT-7604	Male	50	Partial Remission/Response	0	3725	0	3725	Astroctyoma, IDH mut	G2&G3	Mutant	non-codel	no alteration	no alteration	non-homdel	no alteration	no alteration	no alteration	no alteration	No chr 19/20 gain	No combined CNA	WT	WT	Mutant	Methylated
TCGA-TM-A84F-01A-11R-A36H-07	19.2152	4.33737	TCGA-TM-A84F	Male	48	Complete Remission/Response	0	1796	0	1796	Astroctyoma, IDH mut	G2&G3	Mutant	non-codel	no alteration	no alteration	non-homdel	no alteration	no alteration	no alteration	no alteration	No chr 19/20 gain	No combined CNA	WT	WT	WT	Methylated
TCGA-DU-6393-01A-11R-1708-07	11.9375	3.69349	TCGA-DU-6393	Male	66	[Not Available]	1	1585	NA	1585	Oligodendroglioma, IDH mut, 1p/19q-codel	G2&G3	Mutant	codel	no alteration	no alteration	non-homdel	no alteration	no alteration	no alteration	no alteration	No chr 19/20 gain	No combined CNA	WT	WT	WT	Methylated
TCGA-DU-7292-01A-11R-2027-07	30.6208	4.9828	TCGA-DU-7292	Male	69	Progressive Disease	1	242	1	242	Glioblastoma,IDH WT	G4	WT	non-codel	HOMDEL (driver)	HOMDEL (driver)	homdel	no alteration	R252P (driver), AMP (driver)	no alteration	no alteration	No chr 19/20 gain	No combined CNA	WT	WT	WT	Methylated
TCGA-S9-A7J2-01A-11R-A34F-07	2.2397	1.69586	TCGA-S9-A7J2	Male	25	Partial Remission/Response	0	62	0	62	Oligodendroglioma, IDH mut, 1p/19q-codel	G2&G3	Mutant	codel	no alteration	no alteration	non-homdel	no alteration	no alteration	no alteration	no alteration	No chr 19/20 gain	No combined CNA	WT	WT	WT	Methylated
TCGA-HT-7476-01A-11R-2027-07	12.1554	3.71758	TCGA-HT-7476	Male	26	Stable Disease	0	199	0	199	Astroctyoma, IDH mut	G4	Mutant	non-codel	HOMDEL (driver)	HOMDEL (driver)	homdel	no alteration	no alteration	no alteration	no alteration	No chr 19/20 gain	No combined CNA	WT	WT	Mutant	Methylated
TCGA-P5-A5EX-01A-12R-A28M-07	1.1385	1.0966	TCGA-P5-A5EX	Female	41	Partial Remission/Response	0	243	0	243	Oligodendroglioma, IDH mut, 1p/19q-codel	G2&G3	Mutant	codel	no alteration	no alteration	non-homdel	no alteration	no alteration	no alteration	no alteration	No chr 19/20 gain	No combined CNA	WT	WT	WT	Methylated
TCGA-P5-A737-01A-11R-A32Q-07	5.9548	2.79801	TCGA-P5-A737	Male	47	Complete Remission/Response	0	372	0	372	Oligodendroglioma, IDH mut, 1p/19q-codel	G2&G3	Mutant	codel	no alteration	no alteration	non-homdel	no alteration	no alteration	no alteration	no alteration	No chr 19/20 gain	No combined CNA	WT	WT	WT	Methylated
TCGA-S9-A6WH-01A-12R-A33Z-07	1.7253	1.44642	TCGA-S9-A6WH	Female	73	Partial Remission/Response	0	1173	0	1173	Oligodendroglioma, IDH mut, 1p/19q-codel	G2&G3	Mutant	codel	no alteration	no alteration	non-homdel	no alteration	no alteration	no alteration	no alteration	No chr 19/20 gain	No combined CNA	WT	WT	WT	Methylated
TCGA-DU-6408-01A-11R-1708-07	10.6079	3.53704	TCGA-DU-6408	Female	23	Progressive Disease	1	3470	NA	3470	Astroctyoma, IDH mut	G2&G3	Mutant	non-codel	no alteration	no alteration	non-homdel	no alteration	no alteration	no alteration	no alteration	No chr 19/20 gain	No combined CNA	WT	WT	Mutant	Methylated
TCGA-DU-A6S3-01A-12R-A32Q-07	21.5224	4.49329	TCGA-DU-A6S3	Male	60	Stable Disease	0	656	0	656	Oligodendroglioma, IDH mut, 1p/19q-codel	G2&G3	Mutant	codel	no alteration	no alteration	non-homdel	no alteration	no alteration	no alteration	no alteration	No chr 19/20 gain	No combined CNA	WT	WT	WT	Methylated
TCGA-DU-A76L-01A-11R-A32Q-07	44.3458	5.5029	TCGA-DU-A76L	Male	54	Progressive Disease	1	814	1	814	Glioblastoma,IDH WT	G4	WT	non-codel	HOMDEL (driver)	HOMDEL (driver)	homdel	no alteration	AMP (driver)	no alteration	no alteration	No chr 19/20 gain	Gain chr 7 & loss chr 10	WT	WT	WT	Methylated
TCGA-TQ-A7RS-01A-12R-A33Z-07	26.5587	4.78444	TCGA-TQ-A7RS	Female	25	Complete Remission/Response	0	0	0	0	Oligodendroglioma, IDH mut, 1p/19q-codel	G2&G3	Mutant	codel	no alteration	no alteration	non-homdel	no alteration	no alteration	no alteration	no alteration	No chr 19/20 gain	No combined CNA	WT	WT	WT	Methylated
TCGA-DB-A4XC-01A-11R-A26U-07	10.6808	3.54607	TCGA-DB-A4XC	Male	26	Partial Remission/Response	0	1421	0	1421	Astroctyoma, IDH mut	G2&G3	Mutant	non-codel	no alteration	no alteration	non-homdel	no alteration	no alteration	no alteration	no alteration	No chr 19/20 gain	No combined CNA	WT	WT	Mutant	Methylated
TCGA-HT-7687-01A-11R-2256-07	20.9373	4.45531	TCGA-HT-7687	Male	74	Stable Disease	0	3	0	3	Oligodendroglioma, IDH mut, 1p/19q-codel	G2&G3	Mutant	codel	no alteration	no alteration	non-homdel	no alteration	no alteration	no alteration	no alteration	No chr 19/20 gain	No combined CNA	WT	WT	WT	Methylated
TCGA-HT-7880-01A-11R-2403-07	82.6317	6.38598	TCGA-HT-7880	Male	30	[Not Available]	0	162	0	162	Astroctyoma, IDH mut	G2&G3	Mutant	non-codel	no alteration	no alteration	non-homdel	no alteration	no alteration	no alteration	no alteration	No chr 19/20 gain	No combined CNA	WT	WT	Mutant	Methylated
TCGA-HW-7486-01A-11R-2027-07	213.134	7.74237	TCGA-HW-7486	Male	37	Stable Disease	0	1721	0	1721	Oligodendroglioma, IDH mut, 1p/19q-codel	G2&G3	Mutant	codel	no alteration	no alteration	non-homdel	no alteration	no alteration	no alteration	no alteration	No chr 19/20 gain	No combined CNA	WT	WT	WT	Methylated
TCGA-P5-A72U-01A-31R-A32Q-07	154.535	7.28109	TCGA-P5-A72U	Female	71	Complete Remission/Response	0	7	0	7	Glioblastoma,IDH WT	G4	WT	non-codel	no alteration	no alteration	non-homdel	no alteration	no alteration	no alteration	no alteration	No chr 19/20 gain	Gain chr 7 & loss chr 10	WT	WT	WT	Methylated
TCGA-DB-5280-01A-01R-1470-07	20.2178	4.4072	TCGA-DB-5280	Male	43	Complete Remission/Response	0	1112	0	1112	Astroctyoma, IDH mut	G2&G3	Mutant	non-codel	no alteration	no alteration	non-homdel	no alteration	no alteration	no alteration	no alteration	No chr 19/20 gain	No combined CNA	WT	WT	Mutant	Methylated
TCGA-CS-6188-01A-11R-1896-07	112.105	6.82152	TCGA-CS-6188	Male	48	Progressive Disease	1	814	1	814	Glioblastoma,IDH WT	G4	WT	non-codel	HOMDEL (driver)	HOMDEL (driver)	homdel	no alteration	AMP (driver)	no alteration	no alteration	No chr 19/20 gain	Gain chr 7 & loss chr 10	WT	WT	WT	Unmethylated
TCGA-DU-8167-01A-11R-2256-07	67.6262	6.10069	TCGA-DU-8167	Female	69	Stable Disease	0	471	0	471	Astroctyoma, IDH mut	G2&G3	Mutant	non-codel	no alteration	no alteration	non-homdel	no alteration	no alteration	no alteration	no alteration	No chr 19/20 gain	No combined CNA	WT	WT	WT	Methylated
TCGA-TQ-A7RR-01A-21R-A34F-07	118.813	6.90464	TCGA-TQ-A7RR	Male	38	Partial Remission/Response	0	787	0	787	Astroctyoma, IDH mut	G2&G3	Mutant	non-codel	no alteration	no alteration	non-homdel	no alteration	no alteration	no alteration	no alteration	No chr 19/20 gain	No combined CNA	WT	WT	Mutant	Unmethylated
TCGA-DU-5849-01A-11R-1708-07	49.6636	5.66288	TCGA-DU-5849	Male	48	Stable Disease	0	443	0	443	Oligodendroglioma, IDH mut, 1p/19q-codel	G2&G3	Mutant	codel	no alteration	no alteration	non-homdel	no alteration	no alteration	no alteration	no alteration	No chr 19/20 gain	No combined CNA	WT	WT	WT	Methylated
TCGA-FG-A710-01A-12R-A33Z-07	3.505	2.17153	TCGA-FG-A710	Female	50	Stable Disease	0	1115	0	1115	Oligodendroglioma, IDH mut, 1p/19q-codel	G2&G3	Mutant	codel	no alteration	no alteration	non-homdel	no alteration	no alteration	no alteration	no alteration	No chr 19/20 gain	No combined CNA	WT	WT	WT	Methylated
TCGA-VW-A8FI-01A-11R-A36H-07	23.3831	4.60781	TCGA-VW-A8FI	Male	66	Stable Disease	1	245	1	245	Glioblastoma,IDH WT	G4	WT	non-codel	no alteration	no alteration	non-homdel	no alteration	no alteration	no alteration	no alteration	No chr 19/20 gain	Gain chr 7 & loss chr 10	WT	WT	WT	Unmethylated
TCGA-E1-5304-01A-01R-1470-07	33.8369	5.12254	TCGA-E1-5304	Male	42	Stable Disease	1	1251	1	1251	Astroctyoma, IDH mut	G2&G3	Mutant	non-codel	no alteration	no alteration	non-homdel	no alteration	no alteration	no alteration	no alteration	No chr 19/20 gain	No combined CNA	WT	WT	Mutant	Unmethylated
TCGA-TQ-A7RV-01A-21R-A34F-07	26.7712	4.79552	TCGA-TQ-A7RV	Male	27	Partial Remission/Response	0	1868	0	1868	Astroctyoma, IDH mut	G2&G3	Mutant	non-codel	no alteration	no alteration	non-homdel	no alteration	no alteration	no alteration	no alteration	No chr 19/20 gain	No combined CNA	WT	WT	Mutant	Methylated
TCGA-HT-8104-01A-11R-2404-07	235.765	7.88731	TCGA-HT-8104	Female	51	[Not Available]	0	372	0	372	Glioblastoma,IDH WT	G4	WT	non-codel	HOMDEL (driver)	HOMDEL (driver)	homdel	no alteration	AMP (driver)	no alteration	no alteration	Gain chr 19/20	Gain chr 7 & loss chr 10	WT	WT	WT	Unmethylated
TCGA-DB-A4X9-01A-11R-A26U-07	30.147	4.96102	TCGA-DB-A4X9	Female	33	Complete Remission/Response	0	1412	0	1412	Astroctyoma, IDH mut	G2&G3	Mutant	non-codel	no alteration	no alteration	non-homdel	no alteration	no alteration	no alteration	no alteration	No chr 19/20 gain	No combined CNA	WT	WT	WT	Methylated
TCGA-DU-A5TT-01A-11R-A28M-07	128.558	7.01746	TCGA-DU-A5TT	Male	70	[Discrepancy]	0	743	0	743	Glioblastoma,IDH WT	G4	WT	non-codel	no alteration	no alteration	non-homdel	no alteration	A289V (driver)	no alteration	no alteration	No chr 19/20 gain	No combined CNA	WT	WT	WT	Methylated
TCGA-DB-A75K-01A-11R-A32Q-07	36.6487	5.23453	TCGA-DB-A75K	Female	55	Complete Remission/Response	0	368	0	368	Oligodendroglioma, IDH mut, 1p/19q-codel	G2&G3	Mutant	codel	no alteration	no alteration	non-homdel	no alteration	no alteration	no alteration	no alteration	No chr 19/20 gain	No combined CNA	WT	WT	WT	Methylated
TCGA-DU-6407-02B-11R-A36H-07	61.9337	5.97576	TCGA-DU-6407	Female	35	Progressive Disease	1	2875	1	2875	Astroctyoma, IDH mut	G4	Mutant	non-codel	HOMDEL (driver)	HOMDEL (driver)	homdel	no alteration	no alteration	no alteration	no alteration	No chr 19/20 gain	No combined CNA	WT	WT	Mutant	Methylated
TCGA-CS-4944-01A-01R-1470-07	11.2948	3.61998	TCGA-CS-4944	Male	50	Stable Disease	0	1828	0	1828	Astroctyoma, IDH mut	G2&G3	Mutant	non-codel	no alteration	no alteration	non-homdel	no alteration	no alteration	no alteration	no alteration	No chr 19/20 gain	No combined CNA	WT	WT	WT	Methylated
TCGA-HT-A4DS-01A-11R-A26U-07	16.6053	4.13794	TCGA-HT-A4DS	Female	55	[Not Available]	0	7	0	7	Glioblastoma,IDH WT	G4	WT	non-codel	HOMDEL (driver)	HOMDEL (driver)	homdel	no alteration	no alteration	no alteration	no alteration	No chr 19/20 gain	No combined CNA	WT	WT	WT	Unmethylated
TCGA-P5-A5EW-01A-11R-A27Q-07	48.8513	5.63956	TCGA-P5-A5EW	Female	20	[Not Available]	0	204	0	204	Astroctyoma, IDH mut	G2&G3	Mutant	non-codel	no alteration	no alteration	non-homdel	no alteration	no alteration	no alteration	no alteration	No chr 19/20 gain	No combined CNA	WT	WT	Mutant	Methylated
TCGA-E1-A7YQ-01A-11R-A34R-07	96.7519	6.61105	TCGA-E1-A7YQ	Female	58	Stable Disease	1	1578	1	1578	Glioblastoma,IDH WT	G4	WT	non-codel	no alteration	no alteration	non-homdel	no alteration	G665D, AMP (driver)	no alteration	no alteration	No chr 19/20 gain	Gain chr 7 & loss chr 10	WT	WT	WT	Unmethylated
TCGA-HT-A61C-01A-11R-A29R-07	27.5578	4.83581	TCGA-HT-A61C	Male	66	Complete Remission/Response	1	537	1	537	Glioblastoma,IDH WT	G4	WT	non-codel	HOMDEL (driver)	HOMDEL (driver)	homdel	no alteration	T263P (driver)	no alteration	no alteration	No chr 19/20 gain	Gain chr 7 & loss chr 10	WT	WT	WT	Unmethylated
TCGA-S9-A7QZ-01A-12R-A34R-07	11.5669	3.65156	TCGA-S9-A7QZ	Male	41	Partial Remission/Response	0	826	0	826	Oligodendroglioma, IDH mut, 1p/19q-codel	G2&G3	Mutant	codel	no alteration	no alteration	non-homdel	no alteration	no alteration	no alteration	no alteration	No chr 19/20 gain	No combined CNA	WT	WT	WT	Methylated
TCGA-FG-A87Q-01A-11R-A36H-07	205.762	7.69183	TCGA-FG-A87Q	Female	61	Complete Remission/Response	0	174	0	174	Glioblastoma,IDH WT	G4	WT	non-codel	HOMDEL (driver)	HOMDEL (driver)	homdel	no alteration	T263I (driver), AMP (driver)	no alteration	no alteration	No chr 19/20 gain	Gain chr 7 & loss chr 10	WT	WT	WT	Methylated
TCGA-HT-7485-01A-11R-2027-07	54.8967	5.80469	TCGA-HT-7485	Male	42	Complete Remission/Response	0	122	0	122	Astroctyoma, IDH mut	G2&G3	Mutant	non-codel	no alteration	no alteration	non-homdel	no alteration	no alteration	HOMDEL	no alteration	No chr 19/20 gain	No combined CNA	WT	WT	Mutant	Methylated
TCGA-HT-7884-01B-11R-2403-07	70.8926	6.16777	TCGA-HT-7884	Female	44	Stable Disease	0	343	0	343	Astroctyoma, IDH mut	G2&G3	Mutant	non-codel	no alteration	no alteration	non-homdel	no alteration	no alteration	no alteration	no alteration	No chr 19/20 gain	No combined CNA	WT	WT	Mutant	Methylated
TCGA-DU-7007-01A-11R-2027-07	22.4841	4.55361	TCGA-DU-7007	Male	33	[Not Available]	1	1915	NA	1915	Astroctyoma, IDH mut	G2&G3	Mutant	non-codel	no alteration	no alteration	non-homdel	no alteration	no alteration	no alteration	no alteration	No chr 19/20 gain	No combined CNA	WT	WT	Mutant	Methylated
TCGA-TM-A84O-01A-11R-A36H-07	37.8606	5.28024	TCGA-TM-A84O	Female	61	Complete Remission/Response	1	1011	1	1011	Oligodendroglioma, IDH mut, 1p/19q-codel	G2&G3	Mutant	codel	no alteration	no alteration	non-homdel	no alteration	no alteration	no alteration	no alteration	No chr 19/20 gain	No combined CNA	WT	WT	WT	Methylated
TCGA-DU-5847-01A-11R-1708-07	84.7668	6.42235	TCGA-DU-5847	Female	34	Stable Disease	0	548	0	548	Glioblastoma,IDH WT	G4	WT	non-codel	HOMDEL (driver)	HOMDEL (driver)	homdel	no alteration	no alteration	no alteration	no alteration	No chr 19/20 gain	No combined CNA	WT	WT	WT	Methylated
TCGA-E1-A7Z4-01A-11R-A34R-07	9.1545	3.34405	TCGA-E1-A7Z4	Male	35	Progressive Disease	1	4412	1	4412	Astroctyoma, IDH mut	G2&G3	Mutant	non-codel	no alteration	no alteration	non-homdel	no alteration	no alteration	no alteration	no alteration	No chr 19/20 gain	No combined CNA	WT	WT	Mutant	Methylated
TCGA-QH-A6X4-01A-51R-A32Q-07	60.3777	5.93964	TCGA-QH-A6X4	Male	47	Complete Remission/Response	0	442	0	442	Oligodendroglioma, IDH mut, 1p/19q-codel	G2&G3	Mutant	codel	no alteration	no alteration	non-homdel	no alteration	no alteration	no alteration	no alteration	No chr 19/20 gain	No combined CNA	WT	WT	WT	Methylated
TCGA-S9-A7IY-01A-11R-A34F-07	26.0577	4.75797	TCGA-S9-A7IY	Male	39	Partial Remission/Response	0	715	0	715	Oligodendroglioma, IDH mut, 1p/19q-codel	G2&G3	Mutant	codel	no alteration	no alteration	non-homdel	no alteration	no alteration	no alteration	no alteration	No chr 19/20 gain	No combined CNA	WT	WT	WT	Methylated
TCGA-S9-A6WN-01A-12R-A33Z-07	2.3807	1.75732	TCGA-S9-A6WN	Female	38	Progressive Disease	0	805	0	805	Oligodendroglioma, IDH mut, 1p/19q-codel	G2&G3	Mutant	codel	no alteration	no alteration	non-homdel	no alteration	Y891C	no alteration	no alteration	No chr 19/20 gain	No combined CNA	WT	WT	WT	Methylated
TCGA-DU-7300-01A-21R-2090-07	45.7043	5.54548	TCGA-DU-7300	Female	53	Progressive Disease	1	1886	1	1886	Oligodendroglioma, IDH mut, 1p/19q-codel	G2&G3	Mutant	codel	no alteration	no alteration	non-homdel	no alteration	no alteration	no alteration	no alteration	No chr 19/20 gain	No combined CNA	WT	WT	WT	Methylated
TCGA-FG-A60K-01A-11R-A29R-07	12.9828	3.80558	TCGA-FG-A60K	Female	34	Stable Disease	0	542	0	542	Oligodendroglioma, IDH mut, 1p/19q-codel	G2&G3	Mutant	codel	no alteration	no alteration	non-homdel	no alteration	no alteration	no alteration	no alteration	No chr 19/20 gain	No combined CNA	WT	WT	WT	Methylated
TCGA-IK-7675-01A-11R-2090-07	15.0236	4.00213	TCGA-IK-7675	Male	43	Progressive Disease	1	578	1	578	Astroctyoma, IDH mut	G2&G3	Mutant	non-codel	no alteration	no alteration	non-homdel	no alteration	no alteration	no alteration	no alteration	No chr 19/20 gain	No combined CNA	WT	WT	Mutant	Methylated
TCGA-VM-A8C8-01A-11R-A36H-07	24.583	4.67711	TCGA-VM-A8C8	Female	50	[Unknown]	0	1397	0	1397	Astroctyoma, IDH mut	G2&G3	Mutant	non-codel	no alteration	no alteration	non-homdel	no alteration	no alteration	no alteration	no alteration	No chr 19/20 gain	No combined CNA	WT	WT	Mutant	Unmethylated
TCGA-QH-A86X-01A-11R-A36H-07	5.6116	2.725	TCGA-QH-A86X	Male	33	Complete Remission/Response	0	337	0	337	Oligodendroglioma, IDH mut, 1p/19q-codel	G2&G3	Mutant	codel	no alteration	no alteration	non-homdel	no alteration	no alteration	no alteration	no alteration	No chr 19/20 gain	No combined CNA	WT	WT	WT	Methylated
TCGA-DU-7014-01A-11R-2027-07	5.6044	2.72343	TCGA-DU-7014	Male	59	Progressive Disease	1	3571	1	3571	NA	NA	NA	non-codel	no alteration	no alteration	non-homdel	no alteration	no alteration	no alteration	no alteration	No chr 19/20 gain	No combined CNA	WT	NA	NA	Methylated
TCGA-P5-A736-01A-11R-A32Q-07	15.6166	4.05455	TCGA-P5-A736	Female	44	Complete Remission/Response	0	230	0	230	Astroctyoma, IDH mut	G2&G3	Mutant	non-codel	no alteration	no alteration	non-homdel	no alteration	no alteration	no alteration	no alteration	No chr 19/20 gain	No combined CNA	WT	WT	Mutant	Methylated
TCGA-DH-A7UT-01A-12R-A34F-07	58.2269	5.88818	TCGA-DH-A7UT	Male	30	Stable Disease	1	531	1	531	Astroctyoma, IDH mut	G2&G3	Mutant	non-codel	no alteration	no alteration	non-homdel	no alteration	no alteration	no alteration	no alteration	No chr 19/20 gain	No combined CNA	WT	WT	WT	Methylated
TCGA-FG-7636-01A-11R-2090-07	38.1468	5.29082	TCGA-FG-7636	Male	48	Complete Remission/Response	0	544	0	544	Astroctyoma, IDH mut	G2&G3	Mutant	non-codel	no alteration	no alteration	non-homdel	no alteration	no alteration	no alteration	no alteration	No chr 19/20 gain	No combined CNA	WT	WT	Mutant	Methylated
TCGA-DU-5854-01A-11R-1708-07	246.226	7.94969	TCGA-DU-5854	Female	57	Progressive Disease	0	257	0	257	Glioblastoma,IDH WT	G4	WT	non-codel	HOMDEL (driver)	HOMDEL (driver)	homdel	no alteration	AMP (driver)	no alteration	no alteration	No chr 19/20 gain	Gain chr 7 & loss chr 10	WT	WT	WT	Unmethylated
TCGA-TM-A84J-01A-11R-A36H-07	6.2604	2.86005	TCGA-TM-A84J	Male	63	Progressive Disease	0	735	0	735	Glioblastoma,IDH WT	G4	WT	non-codel	no alteration	no alteration	non-homdel	no alteration	no alteration	no alteration	no alteration	No chr 19/20 gain	No combined CNA	WT	WT	WT	Unmethylated
TCGA-DH-A7UR-01A-11R-A33Z-07	4.5222	2.46524	TCGA-DH-A7UR	Female	59	Complete Remission/Response	0	1650	0	1650	Oligodendroglioma, IDH mut, 1p/19q-codel	G2&G3	Mutant	codel	no alteration	no alteration	non-homdel	no alteration	no alteration	no alteration	no alteration	No chr 19/20 gain	No combined CNA	WT	WT	WT	Methylated
TCGA-HT-7858-01A-11R-2403-07	70.6845	6.16359	TCGA-HT-7858	Male	28	Complete Remission/Response	0	1540	0	1540	Astroctyoma, IDH mut	G2&G3	Mutant	non-codel	no alteration	no alteration	non-homdel	no alteration	no alteration	no alteration	no alteration	No chr 19/20 gain	No combined CNA	WT	WT	Mutant	Methylated
TCGA-HT-7469-01A-11R-2256-07	6.2505	2.85808	TCGA-HT-7469	Male	30	Progressive Disease	1	351	1	351	Glioblastoma,IDH WT	G4	WT	non-codel	no alteration	no alteration	non-homdel	no alteration	no alteration	G35R (driver)	no alteration	No chr 19/20 gain	No combined CNA	WT	WT	Mutant	Methylated
TCGA-DU-A6S2-01A-21R-A32Q-07	40.2871	5.36762	TCGA-DU-A6S2	Female	37	Stable Disease	0	777	0	777	Oligodendroglioma, IDH mut, 1p/19q-codel	G2&G3	Mutant	codel	no alteration	no alteration	non-homdel	no alteration	no alteration	no alteration	no alteration	No chr 19/20 gain	No combined CNA	WT	WT	WT	Methylated
TCGA-S9-A6TW-01A-12R-A32Q-07	2.7514	1.90743	TCGA-S9-A6TW	Male	40	Partial Remission/Response	0	1250	0	1250	Oligodendroglioma, IDH mut, 1p/19q-codel	G2&G3	Mutant	codel	no alteration	no alteration	non-homdel	no alteration	no alteration	no alteration	no alteration	No chr 19/20 gain	No combined CNA	WT	WT	WT	Methylated
TCGA-S9-A89V-01A-11R-A36H-07	20.5741	4.43123	TCGA-S9-A89V	Male	70	Progressive Disease	0	569	0	569	Glioblastoma,IDH WT	G4	WT	non-codel	no alteration	no alteration	non-homdel	no alteration	no alteration	no alteration	no alteration	No chr 19/20 gain	No combined CNA	WT	WT	Mutant	Methylated
TCGA-HT-7856-01A-11R-2403-07	73.0213	6.20987	TCGA-HT-7856	Male	35	Complete Remission/Response	0	1189	0	1189	Oligodendroglioma, IDH mut, 1p/19q-codel	G2&G3	Mutant	codel	no alteration	no alteration	non-homdel	no alteration	no alteration	no alteration	no alteration	No chr 19/20 gain	No combined CNA	WT	WT	WT	Methylated
TCGA-QH-A65Z-01A-11R-A29R-07	19.6001	4.36458	TCGA-QH-A65Z	Male	54	Stable Disease	0	427	0	427	Oligodendroglioma, IDH mut, 1p/19q-codel	G2&G3	Mutant	codel	no alteration	no alteration	non-homdel	no alteration	no alteration	no alteration	no alteration	No chr 19/20 gain	No combined CNA	WT	WT	WT	Methylated
TCGA-FG-A70Y-01A-12R-A34R-07	48.2574	5.62227	TCGA-FG-A70Y	Female	20	Complete Remission/Response	0	868	0	868	Astroctyoma, IDH mut	G4	Mutant	non-codel	HOMDEL (driver)	HOMDEL (driver)	homdel	no alteration	no alteration	no alteration	no alteration	No chr 19/20 gain	No combined CNA	WT	WT	Mutant	Methylated
TCGA-DU-7306-01A-11R-2090-07	27.4532	4.83052	TCGA-DU-7306	Male	67	Progressive Disease	0	1277	0	1277	Astroctyoma, IDH mut	G2&G3	Mutant	non-codel	no alteration	no alteration	non-homdel	no alteration	no alteration	no alteration	no alteration	No chr 19/20 gain	No combined CNA	WT	WT	Mutant	Methylated
TCGA-DU-7011-01A-11R-2027-07	22.8133	4.5737	TCGA-DU-7011	Male	25	Stable Disease	1	3200	1	3200	Astroctyoma, IDH mut	G2&G3	Mutant	non-codel	no alteration	no alteration	non-homdel	no alteration	no alteration	no alteration	no alteration	No chr 19/20 gain	No combined CNA	WT	WT	Mutant	Unmethylated
TCGA-HW-7490-01A-11R-2027-07	14.7433	3.97667	TCGA-HW-7490	Male	41	Progressive Disease	0	1387	0	1387	Astroctyoma, IDH mut	G2&G3	Mutant	non-codel	no alteration	no alteration	non-homdel	no alteration	no alteration	no alteration	no alteration	No chr 19/20 gain	No combined CNA	WT	WT	Mutant	Methylated
TCGA-FG-7637-01A-11R-2090-07	1.8714	1.52175	TCGA-FG-7637	Male	49	Stable Disease	0	1219	0	1219	Astroctyoma, IDH mut	G2&G3	Mutant	non-codel	no alteration	no alteration	non-homdel	no alteration	no alteration	no alteration	no alteration	NA	NA	WT	WT	WT	Methylated
TCGA-P5-A5F2-01A-11R-A28M-07	23.9552	4.64127	TCGA-P5-A5F2	Female	36	Partial Remission/Response	0	242	0	242	Astroctyoma, IDH mut	G2&G3	Mutant	non-codel	no alteration	no alteration	non-homdel	no alteration	no alteration	no alteration	no alteration	No chr 19/20 gain	No combined CNA	WT	WT	Mutant	Methylated
TCGA-QH-A6CX-01A-11R-A32Q-07	69.4161	6.13783	TCGA-QH-A6CX	Male	66	Complete Remission/Response	1	372	1	372	Glioblastoma,IDH WT	G4	WT	non-codel	HOMDEL (driver)	HOMDEL (driver)	homdel	no alteration	R324L (driver), AMP (driver)	no alteration	no alteration	No chr 19/20 gain	No combined CNA	WT	WT	WT	Unmethylated
TCGA-HT-A61B-01A-11R-A29R-07	24.93	4.69655	TCGA-HT-A61B	Male	22	Complete Remission/Response	0	533	0	533	Astroctyoma, IDH mut	G2&G3	Mutant	non-codel	no alteration	no alteration	non-homdel	AMP (driver)	no alteration	no alteration	no alteration	No chr 19/20 gain	No combined CNA	WT	WT	WT	Methylated
TCGA-DH-A66F-01A-11R-A29R-07	12.4093	3.74516	TCGA-DH-A66F	Male	49	Complete Remission/Response	0	523	0	523	Oligodendroglioma, IDH mut, 1p/19q-codel	G2&G3	Mutant	codel	no alteration	no alteration	non-homdel	no alteration	no alteration	no alteration	no alteration	No chr 19/20 gain	No combined CNA	WT	WT	WT	Methylated
TCGA-DB-5277-01A-01R-1470-07	49.3561	5.65409	TCGA-DB-5277	Male	34	Complete Remission/Response	1	1547	1	1547	Astroctyoma, IDH mut	G2&G3	Mutant	non-codel	no alteration	no alteration	non-homdel	no alteration	no alteration	no alteration	no alteration	No chr 19/20 gain	No combined CNA	WT	WT	WT	Methylated
TCGA-QH-A6X8-01A-12R-A32Q-07	50.8312	5.69575	TCGA-QH-A6X8	Female	56	Stable Disease	0	509	0	509	Oligodendroglioma, IDH mut, 1p/19q-codel	G2&G3	Mutant	codel	no alteration	no alteration	non-homdel	no alteration	no alteration	no alteration	no alteration	No chr 19/20 gain	No combined CNA	WT	WT	WT	Methylated
TCGA-P5-A733-01A-11R-A32Q-07	4.0508	2.33651	TCGA-P5-A733	Female	52	Complete Remission/Response	0	414	0	414	Astroctyoma, IDH mut	G2&G3	Mutant	non-codel	no alteration	no alteration	non-homdel	no alteration	no alteration	no alteration	no alteration	No chr 19/20 gain	No combined CNA	WT	WT	Mutant	Methylated
TCGA-DU-A7TB-01A-11R-A33Z-07	99.7947	6.65528	TCGA-DU-A7TB	Male	56	Progressive Disease	0	1567	0	1567	Glioblastoma,IDH WT	G4	WT	non-codel	no alteration	no alteration	non-homdel	no alteration	no alteration	no alteration	no alteration	No chr 19/20 gain	No combined CNA	WT	WT	WT	Unmethylated
TCGA-P5-A5ET-01A-11R-A27Q-07	39.1361	5.32683	TCGA-P5-A5ET	Male	27	[Not Available]	0	0	0	0	Oligodendroglioma, IDH mut, 1p/19q-codel	G2&G3	Mutant	codel	no alteration	no alteration	non-homdel	no alteration	no alteration	no alteration	no alteration	No chr 19/20 gain	No combined CNA	WT	WT	WT	Methylated
TCGA-FG-A6IZ-01A-11R-A31N-07	1.3705	1.24519	TCGA-FG-A6IZ	Male	60	Complete Remission/Response	0	457	0	457	Oligodendroglioma, IDH mut, 1p/19q-codel	G2&G3	Mutant	codel	no alteration	no alteration	non-homdel	no alteration	no alteration	no alteration	no alteration	No chr 19/20 gain	No combined CNA	WT	WT	WT	Methylated
TCGA-S9-A6UB-01A-21R-A33Z-07	49.1932	5.64942	TCGA-S9-A6UB	Male	52	Complete Remission/Response	0	3761	0	3761	Oligodendroglioma, IDH mut, 1p/19q-codel	G2&G3	Mutant	codel	no alteration	no alteration	non-homdel	no alteration	no alteration	no alteration	no alteration	No chr 19/20 gain	No combined CNA	WT	WT	WT	Methylated
TCGA-HT-7473-01A-11R-2027-07	39.6812	5.34629	TCGA-HT-7473	Male	28	Complete Remission/Response	0	503	0	503	Astroctyoma, IDH mut	G2&G3	Mutant	non-codel	no alteration	no alteration	non-homdel	no alteration	no alteration	no alteration	no alteration	No chr 19/20 gain	No combined CNA	WT	WT	Mutant	Unmethylated
TCGA-TQ-A7RQ-01A-11R-A33Z-07	2.1481	1.65448	TCGA-TQ-A7RQ	Female	38	Complete Remission/Response	0	795	0	795	Oligodendroglioma, IDH mut, 1p/19q-codel	G2&G3	Mutant	codel	no alteration	no alteration	non-homdel	no alteration	no alteration	no alteration	no alteration	No chr 19/20 gain	No combined CNA	WT	WT	WT	Methylated
TCGA-DB-A64W-01A-11R-A29R-07	21.7732	4.50927	TCGA-DB-A64W	Female	65	Stable Disease	1	438	0	438	Oligodendroglioma, IDH mut, 1p/19q-codel	G2&G3	Mutant	codel	no alteration	no alteration	non-homdel	no alteration	no alteration	no alteration	no alteration	No chr 19/20 gain	No combined CNA	WT	WT	WT	Methylated
TCGA-R8-A73M-01A-11R-A32Q-07	1.0143	1.01028	TCGA-R8-A73M	Female	48	[Unknown]	0	1806	0	1806	Oligodendroglioma, IDH mut, 1p/19q-codel	G2&G3	Mutant	codel	no alteration	no alteration	non-homdel	no alteration	no alteration	no alteration	no alteration	No chr 19/20 gain	No combined CNA	WT	WT	WT	Methylated
TCGA-HT-7690-01A-11R-2256-07	66.3266	6.0731	TCGA-HT-7690	Male	29	[Not Available]	0	3	0	3	Astroctyoma, IDH mut	G2&G3	Mutant	non-codel	no alteration	no alteration	non-homdel	no alteration	no alteration	no alteration	no alteration	No chr 19/20 gain	No combined CNA	WT	WT	Mutant	Methylated
TCGA-FG-6691-01A-11R-1896-07	42.6856	5.44909	TCGA-FG-6691	Female	23	Complete Remission/Response	0	1257	0	1257	Astroctyoma, IDH mut	G2&G3	Mutant	non-codel	no alteration	no alteration	non-homdel	no alteration	no alteration	no alteration	no alteration	No chr 19/20 gain	No combined CNA	WT	WT	Mutant	Unmethylated
TCGA-QH-A6CY-01A-11R-A32Q-07	56.9103	5.85575	TCGA-QH-A6CY	Male	38	Stable Disease	0	408	0	408	Oligodendroglioma, IDH mut, 1p/19q-codel	G2&G3	Mutant	codel	no alteration	no alteration	non-homdel	no alteration	no alteration	no alteration	no alteration	No chr 19/20 gain	No combined CNA	WT	WT	WT	Methylated
TCGA-HT-A615-01A-11R-A29R-07	23.427	4.6104	TCGA-HT-A615	Female	38	Complete Remission/Response	0	515	0	515	Oligodendroglioma, IDH mut, 1p/19q-codel	G2&G3	Mutant	codel	no alteration	no alteration	non-homdel	no alteration	no alteration	no alteration	no alteration	No chr 19/20 gain	No combined CNA	WT	WT	WT	Methylated
TCGA-DU-A7TA-01A-11R-A33Z-07	23.4848	4.61381	TCGA-DU-A7TA	Male	32	Stable Disease	0	2565	0	2565	Astroctyoma, IDH mut	G2&G3	Mutant	non-codel	no alteration	no alteration	non-homdel	no alteration	no alteration	no alteration	no alteration	No chr 19/20 gain	No combined CNA	WT	WT	Mutant	Methylated
TCGA-DU-6397-02A-12R-A36H-07	3.3538	2.12228	TCGA-DU-6397	Male	45	Progressive Disease	1	1401	1	1401	Oligodendroglioma, IDH mut, 1p/19q-codel	G2&G3	Mutant	codel	no alteration	no alteration	non-homdel	no alteration	no alteration	no alteration	no alteration	No chr 19/20 gain	No combined CNA	WT	WT	WT	Methylated
TCGA-HT-A61A-01A-11R-A29R-07	53.9889	5.78107	TCGA-HT-A61A	Female	20	Complete Remission/Response	0	194	0	194	Astroctyoma, IDH mut	G2&G3	Mutant	non-codel	no alteration	no alteration	non-homdel	no alteration	no alteration	no alteration	no alteration	NA	NA	NA	WT	WT	Methylated
TCGA-QH-A6CW-01A-11R-A32Q-07	19.0693	4.32692	TCGA-QH-A6CW	Male	43	Partial Remission/Response	0	414	0	414	Astroctyoma, IDH mut	G2&G3	Mutant	non-codel	no alteration	no alteration	non-homdel	no alteration	no alteration	no alteration	no alteration	No chr 19/20 gain	No combined CNA	WT	WT	Mutant	Methylated
TCGA-TQ-A7RW-01A-11R-A33Z-07	20.1088	4.39977	TCGA-TQ-A7RW	Male	32	Progressive Disease	1	821	1	821	Astroctyoma, IDH mut	G2&G3	Mutant	non-codel	no alteration	no alteration	non-homdel	no alteration	no alteration	no alteration	no alteration	No chr 19/20 gain	No combined CNA	WT	WT	WT	Methylated
TCGA-HT-7467-01A-11R-2027-07	178.11	7.4847	TCGA-HT-7467	Male	54	Complete Remission/Response	0	3	0	3	Oligodendroglioma, IDH mut, 1p/19q-codel	G2&G3	Mutant	codel	no alteration	no alteration	non-homdel	no alteration	no alteration	no alteration	no alteration	No chr 19/20 gain	No combined CNA	WT	WT	WT	Methylated
TCGA-DB-A4XB-01A-11R-A26U-07	26.1176	4.76116	TCGA-DB-A4XB	Male	38	Stable Disease	0	919	0	919	Astroctyoma, IDH mut	G2&G3	Mutant	non-codel	no alteration	no alteration	non-homdel	no alteration	no alteration	no alteration	no alteration	No chr 19/20 gain	No combined CNA	WT	WT	WT	Methylated
TCGA-TQ-A7RU-01A-21R-A34F-07	3.6733	2.22444	TCGA-TQ-A7RU	Male	51	Partial Remission/Response	0	1032	0	1032	Oligodendroglioma, IDH mut, 1p/19q-codel	G2&G3	Mutant	codel	no alteration	no alteration	non-homdel	no alteration	no alteration	no alteration	no alteration	No chr 19/20 gain	No combined CNA	WT	WT	WT	Methylated
TCGA-HT-8109-01A-11R-2404-07	58.6353	5.89809	TCGA-HT-8109	Male	64	[Unknown]	0	169	0	169	Oligodendroglioma, IDH mut, 1p/19q-codel	G2&G3	Mutant	codel	no alteration	no alteration	non-homdel	no alteration	no alteration	no alteration	no alteration	No chr 19/20 gain	No combined CNA	WT	WT	WT	Methylated
TCGA-F6-A8O4-01A-11R-A36H-07	19.5205	4.35899	TCGA-F6-A8O4	Male	44	Complete Remission/Response	0	6	0	6	Astroctyoma, IDH mut	G2&G3	Mutant	non-codel	no alteration	no alteration	non-homdel	no alteration	no alteration	no alteration	no alteration	No chr 19/20 gain	No combined CNA	WT	WT	Mutant	Methylated
TCGA-HW-A5KJ-01A-12R-A27Q-07	1.4213	1.27578	TCGA-HW-A5KJ	Male	68	Progressive Disease	1	962	1	962	Oligodendroglioma, IDH mut, 1p/19q-codel	G2&G3	Mutant	codel	no alteration	no alteration	non-homdel	no alteration	no alteration	no alteration	no alteration	No chr 19/20 gain	No combined CNA	WT	WT	WT	Methylated
TCGA-FG-5962-01B-11R-1896-07	16.3998	4.121	TCGA-FG-5962	Male	54	Stable Disease	0	1453	0	1453	Oligodendroglioma, IDH mut, 1p/19q-codel	G2&G3	Mutant	codel	no alteration	no alteration	non-homdel	no alteration	no alteration	no alteration	no alteration	No chr 19/20 gain	No combined CNA	WT	WT	WT	Methylated
TCGA-DB-A64X-01A-11R-A29R-07	7.4776	3.08366	TCGA-DB-A64X	Female	56	Stable Disease	0	563	0	563	Astroctyoma, IDH mut	G2&G3	Mutant	non-codel	no alteration	no alteration	non-homdel	HOMDEL	no alteration	no alteration	no alteration	No chr 19/20 gain	No combined CNA	WT	WT	WT	Methylated
TCGA-HW-7493-01A-11R-2027-07	14.3614	3.94124	TCGA-HW-7493	Female	40	Stable Disease	0	2107	0	2107	NA	NA	NA	non-codel	no alteration	no alteration	non-homdel	no alteration	no alteration	no alteration	no alteration	No chr 19/20 gain	No combined CNA	WT	NA	NA	Methylated
TCGA-VM-A8CD-01A-11R-A36H-07	127.642	7.00721	TCGA-VM-A8CD	Male	58	[Unknown]	1	240	1	240	Glioblastoma,IDH WT	G4	WT	non-codel	HOMDEL (driver)	HOMDEL (driver)	homdel	no alteration	G598V (driver), A583S	no alteration	no alteration	No chr 19/20 gain	No combined CNA	WT	WT	WT	Unmethylated
TCGA-DB-5278-01A-01R-1470-07	29.7804	4.94394	TCGA-DB-5278	Male	17	Stable Disease	0	2772	0	2772	Oligodendroglioma, IDH mut, 1p/19q-codel	G2&G3	Mutant	codel	no alteration	no alteration	non-homdel	no alteration	no alteration	no alteration	no alteration	No chr 19/20 gain	No combined CNA	WT	WT	WT	Methylated
TCGA-HT-7873-01B-11R-2403-07	67.4931	6.09789	TCGA-HT-7873	Male	29	Stable Disease	0	718	0	718	Astroctyoma, IDH mut	G2&G3	Mutant	non-codel	no alteration	no alteration	non-homdel	no alteration	no alteration	no alteration	no alteration	No chr 19/20 gain	No combined CNA	WT	WT	Mutant	Methylated
TCGA-E1-A7YO-01A-11R-A34F-07	5.6275	2.72846	TCGA-E1-A7YO	Male	45	Stable Disease	1	2282	1	2282	Oligodendroglioma, IDH mut, 1p/19q-codel	G2&G3	Mutant	codel	no alteration	no alteration	non-homdel	no alteration	no alteration	no alteration	no alteration	No chr 19/20 gain	No combined CNA	WT	WT	WT	Methylated
TCGA-VM-A8CB-01A-11R-A36H-07	2.1772	1.66776	TCGA-VM-A8CB	Male	33	[Unknown]	0	3	0	3	Oligodendroglioma, IDH mut, 1p/19q-codel	G2&G3	Mutant	codel	no alteration	no alteration	non-homdel	no alteration	no alteration	no alteration	no alteration	No chr 19/20 gain	No combined CNA	WT	WT	WT	Methylated
TCGA-HT-7902-01A-12R-2403-07	351.943	8.46329	TCGA-HT-7902	Female	30	Stable Disease	0	956	0	956	Astroctyoma, IDH mut	G2&G3	Mutant	non-codel	no alteration	no alteration	non-homdel	no alteration	no alteration	no alteration	no alteration	No chr 19/20 gain	No combined CNA	WT	WT	Mutant	Methylated
TCGA-FG-8191-01A-11R-2256-07	63.7219	6.01618	TCGA-FG-8191	Male	30	Stable Disease	0	992	0	992	Astroctyoma, IDH mut	G2&G3	Mutant	non-codel	no alteration	no alteration	non-homdel	no alteration	no alteration	no alteration	no alteration	No chr 19/20 gain	No combined CNA	WT	WT	Mutant	Unmethylated
TCGA-HT-7620-01A-11R-2256-07	223.493	7.81053	TCGA-HT-7620	Male	40	Complete Remission/Response	0	434	0	434	Oligodendroglioma, IDH mut, 1p/19q-codel	G2&G3	Mutant	codel	no alteration	no alteration	non-homdel	no alteration	no alteration	no alteration	no alteration	No chr 19/20 gain	No combined CNA	WT	WT	WT	Methylated
TCGA-DH-5144-01A-01R-1470-07	1.5679	1.36059	TCGA-DH-5144	Female	56	Complete Remission/Response	0	748	0	748	Oligodendroglioma, IDH mut, 1p/19q-codel	G2&G3	Mutant	codel	no alteration	no alteration	non-homdel	no alteration	no alteration	no alteration	no alteration	No chr 19/20 gain	No combined CNA	WT	WT	Mutant	Methylated
TCGA-S9-A7J3-01A-21R-A34R-07	33.8812	5.12438	TCGA-S9-A7J3	Female	52	Partial Remission/Response	0	629	0	629	Oligodendroglioma, IDH mut, 1p/19q-codel	G2&G3	Mutant	codel	no alteration	no alteration	non-homdel	no alteration	no alteration	no alteration	no alteration	No chr 19/20 gain	No combined CNA	WT	WT	WT	Methylated
TCGA-HW-A5KM-01A-11R-A27Q-07	7.6848	3.11849	TCGA-HW-A5KM	Male	35	Progressive Disease	0	630	0	630	Astroctyoma, IDH mut	G2&G3	Mutant	non-codel	no alteration	no alteration	non-homdel	no alteration	no alteration	no alteration	no alteration	No chr 19/20 gain	No combined CNA	WT	WT	WT	Methylated
TCGA-S9-A6TV-01A-12R-A34R-07	8.5938	3.2621	TCGA-S9-A6TV	Male	50	Complete Remission/Response	0	571	0	571	Astroctyoma, IDH mut	G2&G3	Mutant	non-codel	no alteration	no alteration	non-homdel	no alteration	no alteration	no alteration	no alteration	No chr 19/20 gain	No combined CNA	WT	WT	Mutant	Methylated
TCGA-HT-A5RB-01A-11R-A28M-07	15.5107	4.04533	TCGA-HT-A5RB	Male	24	[Not Available]	0	3	0	3	Astroctyoma, IDH mut	G2&G3	Mutant	non-codel	no alteration	no alteration	non-homdel	no alteration	no alteration	no alteration	no alteration	No chr 19/20 gain	No combined CNA	WT	WT	Mutant	Methylated
TCGA-VV-A829-01A-21R-A36H-07	23.5643	4.61849	TCGA-VV-A829	Male	44	Stable Disease	0	1127	0	1127	Oligodendroglioma, IDH mut, 1p/19q-codel	G2&G3	Mutant	codel	no alteration	no alteration	non-homdel	no alteration	no alteration	no alteration	no alteration	No chr 19/20 gain	No combined CNA	WT	WT	WT	Methylated
TCGA-HT-8010-01A-11R-2403-07	30.2497	4.96577	TCGA-HT-8010	Female	64	Stable Disease	0	50	0	50	Oligodendroglioma, IDH mut, 1p/19q-codel	G2&G3	Mutant	codel	no alteration	no alteration	non-homdel	no alteration	no alteration	no alteration	no alteration	No chr 19/20 gain	No combined CNA	WT	WT	WT	Methylated
TCGA-RY-A83Y-01A-11R-A36H-07	5.2017	2.63266	TCGA-RY-A83Y	Male	45	[Not Available]	0	166	0	166	Oligodendroglioma, IDH mut, 1p/19q-codel	G2&G3	Mutant	codel	no alteration	no alteration	non-homdel	no alteration	no alteration	no alteration	no alteration	No chr 19/20 gain	No combined CNA	WT	WT	WT	Methylated
TCGA-TQ-A8XE-02A-11R-A36H-07	47.3775	5.59626	TCGA-TQ-A8XE	Female	42	Partial Remission/Response	1	954	1	954	Astroctyoma, IDH mut	G2&G3	Mutant	non-codel	no alteration	no alteration	non-homdel	no alteration	no alteration	no alteration	no alteration	No chr 19/20 gain	No combined CNA	WT	WT	WT	Methylated
TCGA-TQ-A7RK-02B-11R-A40A-07	68.9385	6.12801	TCGA-TQ-A7RK	Male	29	Complete Remission/Response	0	1341	0	1341	Astroctyoma, IDH mut	G2&G3	Mutant	non-codel	no alteration	no alteration	non-homdel	no alteration	no alteration	no alteration	no alteration	No chr 19/20 gain	No combined CNA	WT	WT	Mutant	Methylated
TCGA-TQ-A7RK-01A-11R-A33Z-07	21.4028	4.48561	TCGA-TQ-A7RK	Male	29	Complete Remission/Response	0	1341	0	1341	Astroctyoma, IDH mut	G2&G3	Mutant	non-codel	no alteration	no alteration	non-homdel	no alteration	no alteration	no alteration	no alteration	No chr 19/20 gain	No combined CNA	WT	WT	Mutant	Methylated
TCGA-S9-A6U9-01A-11R-A32Q-07	42.6536	5.44803	TCGA-S9-A6U9	Male	36	Partial Remission/Response	0	2918	0	2918	Astroctyoma, IDH mut	G2&G3	Mutant	non-codel	no alteration	no alteration	non-homdel	no alteration	no alteration	no alteration	no alteration	No chr 19/20 gain	No combined CNA	WT	WT	Mutant	Methylated
TCGA-DU-7006-01A-11R-2027-07	142.909	7.16901	TCGA-DU-7006	Female	60	Progressive Disease	1	349	1	349	Glioblastoma,IDH WT	G4	WT	non-codel	HOMDEL (driver)	HOMDEL (driver)	homdel	no alteration	R252P (driver)	no alteration	no alteration	No chr 19/20 gain	Gain chr 7 & loss chr 10	WT	WT	WT	Methylated
TCGA-VW-A7QS-01A-12R-A33Z-07	2.3341	1.7373	TCGA-VW-A7QS	Female	35	Stable Disease	0	706	0	706	Oligodendroglioma, IDH mut, 1p/19q-codel	G2&G3	Mutant	codel	no alteration	no alteration	non-homdel	no alteration	no alteration	no alteration	no alteration	No chr 19/20 gain	No combined CNA	WT	WT	WT	Methylated
TCGA-DU-A76K-01A-11R-A33Z-07	50.5398	5.68762	TCGA-DU-A76K	Male	87	Progressive Disease	1	347	1	347	Glioblastoma,IDH WT	G4	WT	non-codel	HOMDEL (driver)	HOMDEL (driver)	homdel	no alteration	no alteration	no alteration	no alteration	Gain chr 19/20	Gain chr 7 & loss chr 10	WT	WT	WT	Unmethylated
TCGA-DB-A4XF-01A-11R-A27Q-07	15.0805	4.00724	TCGA-DB-A4XF	Female	41	Stable Disease	0	1021	0	1021	Astroctyoma, IDH mut	G2&G3	Mutant	non-codel	no alteration	no alteration	non-homdel	no alteration	no alteration	no alteration	no alteration	No chr 19/20 gain	No combined CNA	WT	WT	WT	Methylated
TCGA-FG-7634-01A-11R-2090-07	56.9809	5.85751	TCGA-FG-7634	Male	28	Stable Disease	0	467	0	467	Oligodendroglioma, IDH mut, 1p/19q-codel	G2&G3	Mutant	codel	no alteration	no alteration	non-homdel	no alteration	no alteration	no alteration	no alteration	No chr 19/20 gain	No combined CNA	WT	WT	WT	Methylated
TCGA-S9-A6TX-01A-21R-A32Q-07	39.6141	5.34391	TCGA-S9-A6TX	Male	46	Complete Remission/Response	0	1245	0	1245	Oligodendroglioma, IDH mut, 1p/19q-codel	G2&G3	Mutant	codel	no alteration	no alteration	non-homdel	no alteration	no alteration	no alteration	no alteration	No chr 19/20 gain	No combined CNA	WT	WT	WT	Methylated
TCGA-VM-A8CH-01A-12R-A36H-07	22.193	4.53562	TCGA-VM-A8CH	Female	24	Complete Remission/Response	0	714	0	714	Astroctyoma, IDH mut	G2&G3	Mutant	non-codel	no alteration	no alteration	non-homdel	no alteration	no alteration	no alteration	no alteration	No chr 19/20 gain	No combined CNA	WT	WT	Mutant	Unmethylated
TCGA-E1-A7YI-01A-11R-A34F-07	19.7841	4.37741	TCGA-E1-A7YI	Female	33	[Unknown]	1	111	1	111	Astroctyoma, IDH mut	G4	Mutant	non-codel	HOMDEL (driver)	HOMDEL (driver)	homdel	no alteration	no alteration	no alteration	no alteration	No chr 19/20 gain	No combined CNA	WT	WT	Mutant	Methylated
TCGA-RY-A845-01A-11R-A36H-07	28.4072	4.8781	TCGA-RY-A845	Female	40	[Not Applicable]	0	596	0	596	Astroctyoma, IDH mut	G2&G3	Mutant	non-codel	no alteration	no alteration	non-homdel	no alteration	no alteration	no alteration	no alteration	No chr 19/20 gain	No combined CNA	WT	WT	WT	Methylated
TCGA-HT-7854-01A-11R-2256-07	75.7815	6.26269	TCGA-HT-7854	Male	62	Stable Disease	0	1201	0	1201	Glioblastoma,IDH WT	G4	WT	non-codel	no alteration	no alteration	non-homdel	no alteration	no alteration	no alteration	no alteration	No chr 19/20 gain	No combined CNA	WT	WT	WT	Unmethylated
TCGA-E1-5318-01A-01R-1470-07	0.5778	0.657914	TCGA-E1-5318	Female	42	Progressive Disease	1	2379	1	2379	Oligodendroglioma, IDH mut, 1p/19q-codel	G2&G3	Mutant	codel	no alteration	no alteration	non-homdel	no alteration	no alteration	no alteration	no alteration	No chr 19/20 gain	No combined CNA	WT	WT	WT	Methylated
TCGA-QH-A6XA-01A-12R-A32Q-07	41.9865	5.42581	TCGA-QH-A6XA	Female	23	Complete Remission/Response	0	502	0	502	Astroctyoma, IDH mut	G2&G3	Mutant	non-codel	no alteration	no alteration	non-homdel	no alteration	no alteration	no alteration	no alteration	No chr 19/20 gain	No combined CNA	WT	WT	Mutant	Methylated
TCGA-HW-8322-01A-11R-2404-07	21.8312	4.51293	TCGA-HW-8322	Male	39	Stable Disease	0	758	0	758	Oligodendroglioma, IDH mut, 1p/19q-codel	G2&G3	Mutant	codel	no alteration	no alteration	non-homdel	no alteration	no alteration	no alteration	no alteration	No chr 19/20 gain	No combined CNA	WT	WT	WT	Methylated
TCGA-DB-A64S-01A-11R-A29R-07	29.4359	4.9277	TCGA-DB-A64S	Male	20	Complete Remission/Response	0	835	0	835	Astroctyoma, IDH mut	G2&G3	Mutant	non-codel	no alteration	no alteration	non-homdel	no alteration	no alteration	no alteration	no alteration	No chr 19/20 gain	No combined CNA	WT	WT	Mutant	Unmethylated
TCGA-S9-A6TU-01A-12R-A32Q-07	20.307	4.41326	TCGA-S9-A6TU	Male	38	Partial Remission/Response	0	2650	0	2650	Astroctyoma, IDH mut	G2&G3	Mutant	non-codel	no alteration	no alteration	non-homdel	no alteration	no alteration	no alteration	no alteration	No chr 19/20 gain	No combined CNA	WT	WT	WT	Methylated
TCGA-S9-A6U5-01A-12R-A33Z-07	3.4787	2.16308	TCGA-S9-A6U5	Male	33	Complete Remission/Response	0	992	0	992	Oligodendroglioma, IDH mut, 1p/19q-codel	G2&G3	Mutant	codel	no alteration	no alteration	non-homdel	no alteration	no alteration	no alteration	no alteration	No chr 19/20 gain	No combined CNA	WT	WT	WT	Methylated
TCGA-FG-5964-01A-11R-1708-07	34.5505	5.1518	TCGA-FG-5964	Male	62	Stable Disease	0	1588	0	1588	Oligodendroglioma, IDH mut, 1p/19q-codel	G2&G3	Mutant	codel	no alteration	no alteration	non-homdel	no alteration	no alteration	no alteration	no alteration	No chr 19/20 gain	No combined CNA	WT	WT	WT	Methylated
TCGA-E1-A7YY-01A-11R-A34R-07	27.7161	4.84379	TCGA-E1-A7YY	Female	27	Stable Disease	1	4445	1	4445	Astroctyoma, IDH mut	G2&G3	Mutant	non-codel	no alteration	no alteration	non-homdel	no alteration	no alteration	no alteration	no alteration	No chr 19/20 gain	No combined CNA	WT	WT	WT	Methylated
TCGA-QH-A6CU-01A-11R-A31N-07	47.7636	5.60773	TCGA-QH-A6CU	Female	52	Stable Disease	0	451	0	451	Oligodendroglioma, IDH mut, 1p/19q-codel	G2&G3	Mutant	codel	no alteration	no alteration	non-homdel	no alteration	no alteration	no alteration	no alteration	No chr 19/20 gain	No combined CNA	WT	WT	WT	Methylated
TCGA-DH-A669-01A-12R-A31N-07	2.4763	1.79755	TCGA-DH-A669	Male	70	Stable Disease	1	919	0	919	Oligodendroglioma, IDH mut, 1p/19q-codel	G2&G3	Mutant	codel	no alteration	no alteration	non-homdel	no alteration	no alteration	no alteration	no alteration	No chr 19/20 gain	No combined CNA	WT	WT	WT	Methylated
TCGA-RY-A840-01A-11R-A36H-07	0.543	0.625738	TCGA-RY-A840	Male	47	Stable Disease	0	854	0	854	Oligodendroglioma, IDH mut, 1p/19q-codel	G2&G3	Mutant	codel	no alteration	no alteration	non-homdel	no alteration	no alteration	no alteration	no alteration	No chr 19/20 gain	No combined CNA	WT	WT	WT	Methylated
TCGA-DB-A4XG-01A-11R-A27Q-07	2.2912	1.71861	TCGA-DB-A4XG	Male	34	Stable Disease	0	2219	0	2219	Oligodendroglioma, IDH mut, 1p/19q-codel	G2&G3	Mutant	codel	no alteration	no alteration	non-homdel	no alteration	no alteration	no alteration	no alteration	No chr 19/20 gain	No combined CNA	WT	WT	WT	Methylated
TCGA-RY-A83X-01A-11R-A36H-07	55.4404	5.81866	TCGA-RY-A83X	Female	46	[Not Applicable]	0	939	0	939	Oligodendroglioma, IDH mut, 1p/19q-codel	G2&G3	Mutant	codel	no alteration	no alteration	non-homdel	no alteration	no alteration	no alteration	no alteration	No chr 19/20 gain	No combined CNA	WT	WT	WT	Methylated
TCGA-P5-A5F0-01A-11R-A28M-07	10.5385	3.52838	TCGA-P5-A5F0	Male	33	Partial Remission/Response	0	287	0	287	Oligodendroglioma, IDH mut, 1p/19q-codel	G2&G3	Mutant	codel	no alteration	no alteration	non-homdel	no alteration	no alteration	no alteration	no alteration	No chr 19/20 gain	No combined CNA	WT	WT	WT	Methylated
TCGA-HT-8108-01A-11R-2404-07	19.2021	4.33643	TCGA-HT-8108	Female	26	Stable Disease	0	76	0	76	Astroctyoma, IDH mut	G2&G3	Mutant	non-codel	no alteration	no alteration	non-homdel	no alteration	no alteration	no alteration	no alteration	No chr 19/20 gain	No combined CNA	WT	WT	Mutant	Methylated
TCGA-DU-A76R-01A-11R-A32Q-07	5.0432	2.59531	TCGA-DU-A76R	Male	51	Progressive Disease	1	648	1	648	Oligodendroglioma, IDH mut, 1p/19q-codel	G2&G3	Mutant	codel	no alteration	no alteration	non-homdel	no alteration	no alteration	no alteration	no alteration	No chr 19/20 gain	No combined CNA	WT	WT	WT	Methylated
TCGA-TM-A84C-01A-11R-A36H-07	52.8289	5.75031	TCGA-TM-A84C	Male	32	Progressive Disease	1	492	1	492	Glioblastoma,IDH WT	G4	WT	non-codel	no alteration	no alteration	non-homdel	no alteration	no alteration	K28M (driver)	no alteration	No chr 19/20 gain	No combined CNA	WT	WT	WT	Unmethylated
TCGA-FG-A87N-01A-11R-A36H-07	10.668	3.54449	TCGA-FG-A87N	Female	37	Stable Disease	0	567	0	567	Astroctyoma, IDH mut	G4	Mutant	non-codel	HOMDEL (driver)	HOMDEL (driver)	homdel	no alteration	no alteration	no alteration	no alteration	No chr 19/20 gain	No combined CNA	WT	WT	WT	Methylated
TCGA-E1-5302-01A-01R-1470-07	70.971	6.16934	TCGA-E1-5302	Male	41	Stable Disease	1	1525	1	1525	Astroctyoma, IDH mut	G2&G3	Mutant	non-codel	no alteration	no alteration	non-homdel	no alteration	no alteration	no alteration	no alteration	No chr 19/20 gain	No combined CNA	WT	WT	Mutant	Methylated
TCGA-S9-A6U6-01A-12R-A33Z-07	27.1033	4.81267	TCGA-S9-A6U6	Male	28	Complete Remission/Response	0	1069	0	1069	Astroctyoma, IDH mut	G2&G3	Mutant	non-codel	no alteration	no alteration	non-homdel	no alteration	no alteration	no alteration	no alteration	No chr 19/20 gain	No combined CNA	WT	WT	Mutant	Methylated
TCGA-DB-A75P-01A-11R-A32Q-07	45.7714	5.54755	TCGA-DB-A75P	Female	25	Complete Remission/Response	0	492	0	492	Glioblastoma,IDH WT	G4	WT	non-codel	HOMDEL (driver)	HOMDEL (driver)	homdel	no alteration	no alteration	no alteration	no alteration	No chr 19/20 gain	No combined CNA	WT	Mutant	WT	Unmethylated
TCGA-HW-A5KK-01A-11R-A27Q-07	126.264	6.99168	TCGA-HW-A5KK	Male	64	Progressive Disease	1	388	1	388	Glioblastoma,IDH WT	G4	WT	non-codel	HOMDEL (driver)	HOMDEL (driver)	homdel	no alteration	AMP (driver)	no alteration	no alteration	No chr 19/20 gain	No combined CNA	WT	WT	WT	Methylated
TCGA-E1-A7Z6-01A-11R-A34R-07	12.8269	3.78941	TCGA-E1-A7Z6	Female	41	Progressive Disease	1	984	1	984	Astroctyoma, IDH mut	G2&G3	Mutant	non-codel	no alteration	no alteration	non-homdel	no alteration	no alteration	no alteration	no alteration	No chr 19/20 gain	No combined CNA	WT	WT	Mutant	Methylated
TCGA-DU-6405-01A-11R-1708-07	89.1602	6.49442	TCGA-DU-6405	Female	51	Progressive Disease	1	605	1	605	Glioblastoma,IDH WT	G4	WT	non-codel	HOMDEL (driver)	HOMDEL (driver)	homdel	no alteration	AMP (driver)	no alteration	no alteration	No chr 19/20 gain	Gain chr 7 & loss chr 10	WT	WT	WT	Methylated
TCGA-CS-6666-01A-11R-1896-07	13.7397	3.88164	TCGA-CS-6666	Male	22	Stable Disease	0	1428	0	1428	Astroctyoma, IDH mut	G2&G3	Mutant	non-codel	no alteration	no alteration	non-homdel	no alteration	no alteration	no alteration	no alteration	No chr 19/20 gain	No combined CNA	WT	WT	Mutant	Methylated
TCGA-HT-8111-01A-11R-2404-07	117.713	6.89133	TCGA-HT-8111	Male	32	[Not Available]	0	7	0	7	Astroctyoma, IDH mut	G2&G3	Mutant	non-codel	no alteration	no alteration	non-homdel	no alteration	no alteration	no alteration	no alteration	No chr 19/20 gain	No combined CNA	WT	WT	WT	Methylated
TCGA-HT-8012-01A-11R-2403-07	8.5765	3.2595	TCGA-HT-8012	Female	30	Stable Disease	0	286	0	286	Oligodendroglioma, IDH mut, 1p/19q-codel	G2&G3	Mutant	codel	no alteration	no alteration	non-homdel	no alteration	no alteration	no alteration	no alteration	No chr 19/20 gain	No combined CNA	WT	WT	WT	Methylated
TCGA-S9-A7QY-01A-11R-A34F-07	50.1854	5.67766	TCGA-S9-A7QY	Female	35	Partial Remission/Response	0	863	0	863	Oligodendroglioma, IDH mut, 1p/19q-codel	G2&G3	Mutant	codel	no alteration	no alteration	non-homdel	no alteration	no alteration	no alteration	no alteration	No chr 19/20 gain	No combined CNA	WT	WT	WT	Methylated
TCGA-DB-5276-01A-01R-1470-07	181.961	7.51539	TCGA-DB-5276	Male	32	Complete Remission/Response	0	2218	0	2218	Astroctyoma, IDH mut	G2&G3	Mutant	non-codel	no alteration	no alteration	non-homdel	no alteration	no alteration	no alteration	no alteration	No chr 19/20 gain	No combined CNA	WT	WT	Mutant	Methylated
TCGA-HT-8113-01A-11R-2404-07	45.02	5.52419	TCGA-HT-8113	Female	49	Complete Remission/Response	0	900	0	900	Astroctyoma, IDH mut	G2&G3	Mutant	non-codel	no alteration	no alteration	non-homdel	no alteration	no alteration	no alteration	no alteration	No chr 19/20 gain	No combined CNA	WT	WT	WT	Methylated
TCGA-HT-7676-01A-11R-2403-07	31.5448	5.02436	TCGA-HT-7676	Male	26	[Not Available]	0	5	0	5	Astroctyoma, IDH mut	G2&G3	Mutant	non-codel	no alteration	no alteration	non-homdel	no alteration	no alteration	no alteration	no alteration	No chr 19/20 gain	No combined CNA	WT	WT	Mutant	Unmethylated
TCGA-DU-A7T6-01A-11R-A33Z-07	24.955	4.69794	TCGA-DU-A7T6	Female	73	[Unknown]	1	547	1	547	Oligodendroglioma, IDH mut, 1p/19q-codel	G2&G3	Mutant	codel	no alteration	no alteration	non-homdel	no alteration	no alteration	no alteration	no alteration	No chr 19/20 gain	No combined CNA	WT	WT	WT	Methylated
TCGA-IK-8125-01A-11R-2256-07	7.8138	3.13976	TCGA-IK-8125	Male	62	Complete Remission/Response	0	1301	0	1301	Oligodendroglioma, IDH mut, 1p/19q-codel	G2&G3	Mutant	codel	no alteration	no alteration	non-homdel	no alteration	no alteration	no alteration	no alteration	No chr 19/20 gain	No combined CNA	WT	WT	WT	Methylated
TCGA-DU-A6S7-01A-21R-A32Q-07	44.8707	5.5195	TCGA-DU-A6S7	Female	27	Stable Disease	0	638	0	638	Astroctyoma, IDH mut	G2&G3	Mutant	non-codel	no alteration	no alteration	non-homdel	no alteration	no alteration	no alteration	no alteration	No chr 19/20 gain	No combined CNA	WT	WT	Mutant	Methylated
TCGA-FG-A6J3-01A-11R-A31N-07	19.8858	4.38445	TCGA-FG-A6J3	Female	52	Progressive Disease	0	677	0	677	Astroctyoma, IDH mut	G2&G3	Mutant	non-codel	no alteration	no alteration	non-homdel	no alteration	no alteration	no alteration	no alteration	No chr 19/20 gain	No combined CNA	WT	WT	WT	Methylated
TCGA-HT-7684-01A-11R-2256-07	13.5404	3.862	TCGA-HT-7684	Male	58	Complete Remission/Response	0	184	0	184	Astroctyoma, IDH mut	G2&G3	Mutant	non-codel	no alteration	no alteration	non-homdel	no alteration	no alteration	no alteration	no alteration	No chr 19/20 gain	No combined CNA	WT	WT	WT	Methylated
TCGA-HT-8110-01A-11R-2404-07	56.4749	5.84486	TCGA-HT-8110	Male	57	Complete Remission/Response	0	419	0	419	Glioblastoma,IDH WT	G4	WT	non-codel	HOMDEL (driver)	HOMDEL (driver)	homdel	no alteration	R108K (driver), AMP (driver)	R3C	no alteration	No chr 19/20 gain	Gain chr 7 & loss chr 10	WT	WT	WT	Methylated
TCGA-QH-A65V-01A-11R-A29R-07	74.5645	6.23964	TCGA-QH-A65V	Female	43	Stable Disease	0	384	0	384	Oligodendroglioma, IDH mut, 1p/19q-codel	G2&G3	Mutant	codel	no alteration	no alteration	non-homdel	no alteration	no alteration	no alteration	no alteration	No chr 19/20 gain	No combined CNA	WT	WT	WT	Methylated
TCGA-S9-A6U8-01A-21R-A33Z-07	73.0314	6.21007	TCGA-S9-A6U8	Male	24	Partial Remission/Response	1	2988	1	2988	Astroctyoma, IDH mut	G2&G3	Mutant	non-codel	no alteration	no alteration	non-homdel	no alteration	no alteration	no alteration	no alteration	No chr 19/20 gain	No combined CNA	WT	WT	Mutant	Methylated
TCGA-S9-A6TZ-01A-21R-A32Q-07	9.928	3.44996	TCGA-S9-A6TZ	Female	39	Partial Remission/Response	0	1120	0	1120	Astroctyoma, IDH mut	G2&G3	Mutant	non-codel	no alteration	no alteration	non-homdel	no alteration	no alteration	no alteration	no alteration	No chr 19/20 gain	No combined CNA	WT	WT	WT	Methylated
TCGA-FG-A4MX-01A-11R-A26U-07	2.9024	1.96436	TCGA-FG-A4MX	Male	47	Complete Remission/Response	0	569	0	569	Astroctyoma, IDH mut	G2&G3	Mutant	non-codel	no alteration	no alteration	non-homdel	no alteration	no alteration	no alteration	no alteration	No chr 19/20 gain	No combined CNA	WT	WT	Mutant	Methylated
TCGA-FG-7643-01A-11R-2090-07	154.017	7.27629	TCGA-FG-7643	Female	49	Stable Disease	0	611	0	611	Glioblastoma,IDH WT	G4	WT	non-codel	no alteration	no alteration	non-homdel	no alteration	no alteration	no alteration	no alteration	No chr 19/20 gain	No combined CNA	WT	WT	WT	Methylated
TCGA-DU-6404-01A-11R-1708-07	90.5956	6.51721	TCGA-DU-6404	Female	24	Progressive Disease	1	4068	1	4068	Glioblastoma,IDH WT	G4	WT	non-codel	no alteration	no alteration	non-homdel	no alteration	no alteration	no alteration	no alteration	No chr 19/20 gain	No combined CNA	WT	WT	WT	Unmethylated
TCGA-E1-A7YK-01A-11R-A34F-07	102.829	6.69807	TCGA-E1-A7YK	Male	52	Stable Disease	1	378	NA	378	Astroctyoma, IDH mut	G2&G3	Mutant	non-codel	no alteration	no alteration	non-homdel	no alteration	no alteration	no alteration	no alteration	No chr 19/20 gain	No combined CNA	WT	WT	Mutant	Methylated
TCGA-DU-6404-02A-21R-A36H-07	61.3363	5.962	TCGA-DU-6404	Female	24	Progressive Disease	1	4068	1	4068	Glioblastoma,IDH WT	G4	WT	non-codel	no alteration	no alteration	non-homdel	no alteration	no alteration	no alteration	no alteration	No chr 19/20 gain	No combined CNA	WT	WT	WT	Unmethylated
TCGA-DU-6404-02B-11R-A36H-07	18.4821	4.28408	TCGA-DU-6404	Female	24	Progressive Disease	1	4068	1	4068	Glioblastoma,IDH WT	G4	WT	non-codel	no alteration	no alteration	non-homdel	no alteration	no alteration	no alteration	no alteration	No chr 19/20 gain	No combined CNA	WT	WT	WT	Unmethylated
TCGA-HT-A619-01A-11R-A29R-07	0.0296	0.042084	TCGA-HT-A619	Female	51	Complete Remission/Response	0	651	0	651	Oligodendroglioma, IDH mut, 1p/19q-codel	G2&G3	Mutant	codel	no alteration	no alteration	non-homdel	no alteration	no alteration	no alteration	no alteration	No chr 19/20 gain	No combined CNA	WT	WT	WT	Methylated
TCGA-DU-7012-01A-11R-2027-07	64.9202	6.04265	TCGA-DU-7012	Female	74	Progressive Disease	1	199	1	199	Glioblastoma,IDH WT	G4	WT	non-codel	HOMDEL (driver)	HOMDEL (driver)	homdel	no alteration	D256G (driver)	no alteration	no alteration	No chr 19/20 gain	Gain chr 7 & loss chr 10	WT	WT	WT	Methylated
TCGA-DU-A76O-01A-11R-A32Q-07	20.2544	4.40969	TCGA-DU-A76O	Male	30	[Unknown]	0	522	0	522	Astroctyoma, IDH mut	G2&G3	Mutant	non-codel	no alteration	no alteration	non-homdel	no alteration	no alteration	no alteration	no alteration	No chr 19/20 gain	No combined CNA	WT	WT	Mutant	Methylated
TCGA-CS-5390-01A-02R-1470-07	41.11	5.39609	TCGA-CS-5390	Female	47	Complete Remission/Response	0	NA	0	NA	Oligodendroglioma, IDH mut, 1p/19q-codel	G2&G3	Mutant	codel	no alteration	no alteration	non-homdel	no alteration	no alteration	no alteration	no alteration	No chr 19/20 gain	No combined CNA	WT	WT	WT	Methylated
TCGA-S9-A7IQ-01A-21R-A34F-07	21.692	4.50411	TCGA-S9-A7IQ	Female	45	Partial Remission/Response	0	1099	0	1099	Oligodendroglioma, IDH mut, 1p/19q-codel	G2&G3	Mutant	codel	no alteration	no alteration	non-homdel	no alteration	no alteration	no alteration	no alteration	No chr 19/20 gain	No combined CNA	WT	WT	WT	Methylated
TCGA-HT-A616-01A-11R-A29R-07	17.1453	4.18152	TCGA-HT-A616	Female	36	[Not Available]	0	55	0	55	Astroctyoma, IDH mut	G2&G3	Mutant	non-codel	no alteration	no alteration	non-homdel	no alteration	no alteration	no alteration	no alteration	No chr 19/20 gain	No combined CNA	WT	WT	Mutant	Methylated
TCGA-P5-A5EV-01A-11R-A27Q-07	9.4384	3.38383	TCGA-P5-A5EV	Male	39	[Not Available]	0	7	0	7	Astroctyoma, IDH mut	G2&G3	Mutant	non-codel	no alteration	no alteration	non-homdel	no alteration	no alteration	no alteration	no alteration	No chr 19/20 gain	No combined CNA	WT	WT	Mutant	Methylated
TCGA-DB-A64L-01A-11R-A29R-07	4.1274	2.35823	TCGA-DB-A64L	Female	67	Complete Remission/Response	0	736	0	736	Oligodendroglioma, IDH mut, 1p/19q-codel	G2&G3	Mutant	codel	no alteration	no alteration	non-homdel	no alteration	no alteration	no alteration	no alteration	No chr 19/20 gain	No combined CNA	WT	WT	WT	Methylated
TCGA-FG-A4MW-01A-11R-A26U-07	98.4776	6.6363	TCGA-FG-A4MW	Male	63	Stable Disease	1	559	1	559	Glioblastoma,IDH WT	G4	WT	non-codel	HOMDEL (driver)	HOMDEL (driver)	homdel	no alteration	G312W, AMP (driver)	no alteration	no alteration	No chr 19/20 gain	Gain chr 7 & loss chr 10	WT	WT	WT	Methylated
TCGA-DU-A5TS-01A-11R-A28M-07	25.2383	4.7136	TCGA-DU-A5TS	Male	42	Stable Disease	0	964	0	964	Astroctyoma, IDH mut	G2&G3	Mutant	non-codel	no alteration	no alteration	non-homdel	no alteration	no alteration	no alteration	no alteration	No chr 19/20 gain	No combined CNA	WT	WT	Mutant	Methylated
TCGA-FG-A4MT-01A-11R-A26U-07	7.0011	3.0002	TCGA-FG-A4MT	Female	27	Complete Remission/Response	0	1164	0	1164	Astroctyoma, IDH mut	G2&G3	Mutant	non-codel	no alteration	no alteration	non-homdel	no alteration	no alteration	no alteration	no alteration	No chr 19/20 gain	No combined CNA	WT	WT	Mutant	Methylated
TCGA-TQ-A7RJ-01A-11R-A33Z-07	17.694	4.2245	TCGA-TQ-A7RJ	Female	25	Stable Disease	0	1229	0	1229	Astroctyoma, IDH mut	G2&G3	Mutant	non-codel	no alteration	no alteration	non-homdel	no alteration	no alteration	no alteration	no alteration	No chr 19/20 gain	No combined CNA	WT	WT	Mutant	Methylated
TCGA-DU-7290-01A-11R-2027-07	67.0029	6.08752	TCGA-DU-7290	Female	45	[Not Available]	1	315	1	315	Glioblastoma,IDH WT	G4	WT	non-codel	no alteration	no alteration	non-homdel	no alteration	no alteration	no alteration	no alteration	No chr 19/20 gain	No combined CNA	WT	WT	WT	Unmethylated
TCGA-HT-7877-01A-11R-2403-07	47.0907	5.58769	TCGA-HT-7877	Female	20	[Not Available]	0	4	0	4	Oligodendroglioma, IDH mut, 1p/19q-codel	G2&G3	Mutant	codel	no alteration	no alteration	non-homdel	no alteration	no alteration	no alteration	no alteration	No chr 19/20 gain	No combined CNA	WT	WT	WT	Methylated
TCGA-DH-A66D-01A-11R-A31N-07	27.9505	4.85552	TCGA-DH-A66D	Female	43	Stable Disease	0	846	0	846	Astroctyoma, IDH mut	G2&G3	Mutant	non-codel	no alteration	no alteration	non-homdel	no alteration	no alteration	no alteration	no alteration	No chr 19/20 gain	No combined CNA	WT	WT	Mutant	Methylated
TCGA-E1-A7YE-01A-11R-A34F-07	9.9636	3.45465	TCGA-E1-A7YE	Female	32	Stable Disease	1	886	1	886	Astroctyoma, IDH mut	G2&G3	Mutant	non-codel	no alteration	no alteration	non-homdel	no alteration	no alteration	no alteration	no alteration	No chr 19/20 gain	No combined CNA	WT	WT	Mutant	Unmethylated
TCGA-DU-5870-02A-12R-A36H-07	2.7869	1.92102	TCGA-DU-5870	Female	34	Progressive Disease	0	5546	0	5546	Oligodendroglioma, IDH mut, 1p/19q-codel	G2&G3	Mutant	codel	no alteration	no alteration	non-homdel	no alteration	no alteration	no alteration	no alteration	No chr 19/20 gain	No combined CNA	WT	WT	WT	Methylated
TCGA-DU-7013-01A-11R-2027-07	25.8379	4.7462	TCGA-DU-7013	Male	59	Progressive Disease	1	269	1	269	Glioblastoma,IDH WT	G4	WT	non-codel	no alteration	no alteration	non-homdel	no alteration	G598V (driver), AMP (driver)	no alteration	no alteration	No chr 19/20 gain	Gain chr 7 & loss chr 10	WT	WT	WT	Unmethylated
TCGA-FG-5965-02B-11R-A29R-07	55.9287	5.83108	TCGA-FG-5965	Female	39	Stable Disease	1	1120	1	1120	Astroctyoma, IDH mut	G4	Mutant	non-codel	HOMDEL (driver)	HOMDEL (driver)	homdel	no alteration	no alteration	no alteration	no alteration	No chr 19/20 gain	No combined CNA	WT	WT	Mutant	Methylated
TCGA-QH-A65S-01A-11R-A29R-07	43.812	5.48581	TCGA-QH-A65S	Female	32	Partial Remission/Response	0	77	0	77	Astroctyoma, IDH mut	G2&G3	Mutant	non-codel	no alteration	no alteration	non-homdel	no alteration	no alteration	no alteration	no alteration	No chr 19/20 gain	No combined CNA	WT	WT	Mutant	Methylated
TCGA-DB-5273-01A-01R-1470-07	35.2841	5.18127	TCGA-DB-5273	Male	33	Complete Remission/Response	0	2493	0	2493	Astroctyoma, IDH mut	G2&G3	Mutant	non-codel	no alteration	no alteration	non-homdel	no alteration	no alteration	no alteration	no alteration	No chr 19/20 gain	No combined CNA	WT	WT	Mutant	Unmethylated
TCGA-CS-6186-01A-12R-2027-07	304.925	8.25703	TCGA-CS-6186	Male	58	Progressive Disease	1	538	1	538	Glioblastoma,IDH WT	G4	WT	non-codel	HOMDEL (driver)	HOMDEL (driver)	homdel	no alteration	no alteration	no alteration	no alteration	No chr 19/20 gain	Gain chr 7 & loss chr 10	WT	WT	WT	Unmethylated
TCGA-W9-A837-01A-11R-A36H-07	15.8421	4.074	TCGA-W9-A837	Male	47	Stable Disease	0	1553	0	1553	Oligodendroglioma, IDH mut, 1p/19q-codel	G2&G3	Mutant	codel	no alteration	no alteration	non-homdel	no alteration	no alteration	no alteration	no alteration	No chr 19/20 gain	No combined CNA	WT	WT	WT	Methylated
TCGA-QH-A6X9-01A-12R-A32Q-07	14.4629	3.95074	TCGA-QH-A6X9	Female	73	[Unknown]	0	58	0	58	Astroctyoma, IDH mut	G2&G3	Mutant	non-codel	no alteration	no alteration	non-homdel	no alteration	no alteration	no alteration	no alteration	No chr 19/20 gain	No combined CNA	WT	WT	Mutant	Methylated
TCGA-TM-A7C4-01A-11R-A32Q-07	16.2478	4.10834	TCGA-TM-A7C4	Female	39	Complete Remission/Response	0	1470	0	1470	Astroctyoma, IDH mut	G2&G3	Mutant	non-codel	no alteration	no alteration	non-homdel	no alteration	no alteration	no alteration	no alteration	No chr 19/20 gain	No combined CNA	WT	WT	Mutant	Methylated
TCGA-DU-7304-02A-12R-A36H-07	0.9593	0.970338	TCGA-DU-7304	Male	43	Progressive Disease	1	709	1	709	Astroctyoma, IDH mut	G2&G3	Mutant	non-codel	no alteration	no alteration	non-homdel	no alteration	no alteration	no alteration	no alteration	No chr 19/20 gain	No combined CNA	WT	WT	Mutant	Methylated
TCGA-FG-8182-01A-11R-2256-07	63.3785	6.00851	TCGA-FG-8182	Male	35	Stable Disease	0	416	0	416	Astroctyoma, IDH mut	G2&G3	Mutant	non-codel	no alteration	no alteration	non-homdel	no alteration	no alteration	no alteration	no alteration	No chr 19/20 gain	No combined CNA	WT	WT	Mutant	Methylated
TCGA-HT-8106-01A-11R-2404-07	57.8157	5.87813	TCGA-HT-8106	Male	53	Stable Disease	0	3	0	3	Astroctyoma, IDH mut	G2&G3	Mutant	non-codel	no alteration	no alteration	non-homdel	no alteration	no alteration	no alteration	no alteration	No chr 19/20 gain	No combined CNA	WT	WT	WT	Methylated
TCGA-DH-A66G-01A-21R-A31N-07	25.9598	4.75274	TCGA-DH-A66G	Female	49	Stable Disease	0	523	0	523	Astroctyoma, IDH mut	G2&G3	Mutant	non-codel	no alteration	no alteration	non-homdel	no alteration	no alteration	no alteration	no alteration	No chr 19/20 gain	No combined CNA	NA	WT	Mutant	Methylated
TCGA-DU-A5TP-01A-11R-A28M-07	19.6665	4.36922	TCGA-DU-A5TP	Male	33	[Discrepancy]	0	1012	0	1012	Astroctyoma, IDH mut	G2&G3	Mutant	non-codel	no alteration	no alteration	non-homdel	no alteration	no alteration	no alteration	no alteration	No chr 19/20 gain	No combined CNA	WT	WT	Mutant	Methylated
TCGA-TM-A84I-01A-11R-A36H-07	4.6565	2.49991	TCGA-TM-A84I	Male	30	Complete Remission/Response	0	854	0	854	Astroctyoma, IDH mut	G2&G3	Mutant	non-codel	no alteration	no alteration	non-homdel	no alteration	no alteration	no alteration	no alteration	No chr 19/20 gain	No combined CNA	WT	WT	Mutant	Methylated
TCGA-DB-5270-01A-02R-1470-07	54.0013	5.78139	TCGA-DB-5270	Female	38	Complete Remission/Response	0	3733	0	3733	Astroctyoma, IDH mut	G2&G3	Mutant	non-codel	no alteration	no alteration	non-homdel	no alteration	no alteration	no alteration	no alteration	No chr 19/20 gain	No combined CNA	WT	WT	Mutant	Methylated
TCGA-HW-8321-01A-11R-2404-07	32.6319	5.07176	TCGA-HW-8321	Male	31	Stable Disease	0	1294	0	1294	Astroctyoma, IDH mut	G2&G3	Mutant	non-codel	no alteration	no alteration	non-homdel	no alteration	no alteration	no alteration	no alteration	No chr 19/20 gain	No combined CNA	WT	WT	WT	Methylated
TCGA-DU-A7TJ-01A-11R-A34R-07	109.039	6.78187	TCGA-DU-A7TJ	Male	55	[Unknown]	0	17	0	17	Glioblastoma,IDH WT	G4	WT	non-codel	no alteration	no alteration	non-homdel	no alteration	AMP (driver)	no alteration	no alteration	No chr 19/20 gain	Gain chr 7 & loss chr 10	WT	WT	WT	Methylated
TCGA-DB-A4XH-01A-11R-A27Q-07	22.488	4.55385	TCGA-DB-A4XH	Female	53	Stable Disease	0	962	0	962	Oligodendroglioma, IDH mut, 1p/19q-codel	G2&G3	Mutant	codel	no alteration	no alteration	non-homdel	no alteration	no alteration	no alteration	no alteration	No chr 19/20 gain	No combined CNA	WT	WT	WT	Methylated
TCGA-DU-7298-01A-11R-2027-07	78.5891	6.3145	TCGA-DU-7298	Female	38	Progressive Disease	1	576	1	576	Astroctyoma, IDH mut	G2&G3	Mutant	non-codel	no alteration	no alteration	non-homdel	no alteration	no alteration	no alteration	no alteration	No chr 19/20 gain	No combined CNA	WT	WT	Mutant	Methylated
TCGA-HT-7689-01A-11R-2256-07	121.204	6.93314	TCGA-HT-7689	Female	58	Complete Remission/Response	0	455	0	455	Astroctyoma, IDH mut	G2&G3	Mutant	non-codel	no alteration	no alteration	non-homdel	no alteration	no alteration	no alteration	no alteration	No chr 19/20 gain	No combined CNA	WT	WT	Mutant	Methylated
TCGA-R8-A6ML-01A-11R-A32Q-07	12.2762	3.73077	TCGA-R8-A6ML	Male	52	[Unknown]	0	2860	0	2860	Oligodendroglioma, IDH mut, 1p/19q-codel	G2&G3	Mutant	codel	no alteration	no alteration	non-homdel	no alteration	no alteration	no alteration	no alteration	No chr 19/20 gain	No combined CNA	WT	WT	WT	Methylated
TCGA-DH-A66B-01A-11R-A29R-07	6.904	2.98258	TCGA-DH-A66B	Male	52	Stable Disease	0	1279	0	1279	Astroctyoma, IDH mut	G2&G3	Mutant	non-codel	no alteration	no alteration	non-homdel	no alteration	no alteration	no alteration	no alteration	No chr 19/20 gain	No combined CNA	WT	WT	WT	Methylated
TCGA-HT-A5R7-01A-11R-A28M-07	51.5603	5.7159	TCGA-HT-A5R7	Female	33	Complete Remission/Response	0	615	0	615	Astroctyoma, IDH mut	G2&G3	Mutant	non-codel	no alteration	no alteration	non-homdel	no alteration	no alteration	no alteration	no alteration	No chr 19/20 gain	No combined CNA	WT	WT	Mutant	Methylated
TCGA-FN-7833-01A-11R-2090-07	20.6761	4.43803	TCGA-FN-7833	Male	25	Complete Remission/Response	0	837	0	837	Astroctyoma, IDH mut	G2&G3	Mutant	non-codel	no alteration	no alteration	non-homdel	no alteration	no alteration	no alteration	no alteration	No chr 19/20 gain	No combined CNA	WT	WT	Mutant	Methylated
TCGA-DU-6542-01A-11R-1896-07	55.2105	5.81277	TCGA-DU-6542	Male	25	Stable Disease	0	73	0	73	Astroctyoma, IDH mut	G2&G3	Mutant	non-codel	no alteration	no alteration	non-homdel	no alteration	no alteration	no alteration	no alteration	No chr 19/20 gain	No combined CNA	WT	WT	WT	Methylated
TCGA-DU-7304-01A-12R-2090-07	28.9956	4.90668	TCGA-DU-7304	Male	43	Progressive Disease	1	709	1	709	Astroctyoma, IDH mut	G2&G3	Mutant	non-codel	no alteration	no alteration	non-homdel	no alteration	no alteration	no alteration	no alteration	No chr 19/20 gain	No combined CNA	WT	WT	Mutant	Methylated
TCGA-HT-7474-01A-11R-2027-07	62.1325	5.98031	TCGA-HT-7474	Male	52	Stable Disease	0	114	0	114	Astroctyoma, IDH mut	G2&G3	Mutant	non-codel	no alteration	no alteration	non-homdel	no alteration	no alteration	no alteration	no alteration	No chr 19/20 gain	No combined CNA	WT	WT	Mutant	Methylated
TCGA-QH-A6X3-01A-21R-A32Q-07	36.3546	5.22321	TCGA-QH-A6X3	Male	27	Complete Remission/Response	0	313	0	313	Astroctyoma, IDH mut	G2&G3	Mutant	non-codel	no alteration	no alteration	non-homdel	no alteration	no alteration	no alteration	no alteration	No chr 19/20 gain	No combined CNA	WT	WT	Mutant	Methylated
TCGA-E1-5319-01A-01R-1896-07	80.9351	6.35641	TCGA-E1-5319	Female	48	Stable Disease	1	2907	1	2907	Oligodendroglioma, IDH mut, 1p/19q-codel	G2&G3	Mutant	codel	no alteration	no alteration	non-homdel	no alteration	no alteration	no alteration	no alteration	No chr 19/20 gain	No combined CNA	WT	WT	WT	Methylated
TCGA-HT-8563-01A-11R-2404-07	11.2925	3.61971	TCGA-HT-8563	Female	30	Complete Remission/Response	0	860	0	860	Astroctyoma, IDH mut	G2&G3	Mutant	non-codel	no alteration	no alteration	non-homdel	no alteration	no alteration	no alteration	no alteration	No chr 19/20 gain	No combined CNA	WT	WT	Mutant	Unmethylated
TCGA-DU-8168-01A-11R-2256-07	2.8519	1.94557	TCGA-DU-8168	Female	55	Stable Disease	0	431	0	431	Oligodendroglioma, IDH mut, 1p/19q-codel	G2&G3	Mutant	codel	no alteration	no alteration	non-homdel	no alteration	no alteration	no alteration	no alteration	No chr 19/20 gain	No combined CNA	WT	WT	WT	Methylated
TCGA-VM-A8CE-01A-11R-A36H-07	70.8825	6.16757	TCGA-VM-A8CE	Male	25	[Unknown]	0	1191	0	1191	Oligodendroglioma, IDH mut, 1p/19q-codel	G2&G3	Mutant	codel	no alteration	no alteration	non-homdel	no alteration	no alteration	no alteration	no alteration	No chr 19/20 gain	No combined CNA	WT	WT	WT	Methylated
TCGA-HT-7693-01A-11R-2256-07	11.0829	3.59489	TCGA-HT-7693	Female	51	Partial Remission/Response	0	533	0	533	Astroctyoma, IDH mut	G2&G3	Mutant	non-codel	no alteration	no alteration	non-homdel	no alteration	no alteration	no alteration	no alteration	No chr 19/20 gain	No combined CNA	WT	WT	Mutant	Methylated
TCGA-WH-A86K-01A-11R-A36H-07	8.5572	3.25659	TCGA-WH-A86K	Male	65	Stable Disease	0	405	0	405	Astroctyoma, IDH mut	G2&G3	Mutant	non-codel	no alteration	no alteration	non-homdel	no alteration	no alteration	no alteration	no alteration	No chr 19/20 gain	No combined CNA	WT	WT	WT	Methylated
TCGA-DB-A64P-01A-11R-A29R-07	13.704	3.87814	TCGA-DB-A64P	Male	40	Complete Remission/Response	0	916	0	916	Oligodendroglioma, IDH mut, 1p/19q-codel	G2&G3	Mutant	codel	no alteration	no alteration	non-homdel	no alteration	no alteration	no alteration	no alteration	No chr 19/20 gain	No combined CNA	WT	WT	WT	Methylated
TCGA-TM-A7CF-02A-11R-A32Q-07	193.528	7.60384	TCGA-TM-A7CF	Female	41	Complete Remission/Response	0	1989	0	1989	Astroctyoma, IDH mut	G2&G3	Mutant	non-codel	no alteration	no alteration	non-homdel	no alteration	no alteration	no alteration	no alteration	No chr 19/20 gain	No combined CNA	WT	WT	WT	Methylated
TCGA-TM-A7CF-01A-11R-A32Q-07	9.9085	3.44738	TCGA-TM-A7CF	Female	41	Complete Remission/Response	0	1989	0	1989	Astroctyoma, IDH mut	G2&G3	Mutant	non-codel	no alteration	no alteration	non-homdel	no alteration	no alteration	no alteration	no alteration	No chr 19/20 gain	No combined CNA	WT	WT	WT	Methylated
TCGA-R8-A6MK-01A-11R-A32Q-07	21.3632	4.48305	TCGA-R8-A6MK	Male	40	[Unknown]	0	2702	0	2702	Oligodendroglioma, IDH mut, 1p/19q-codel	G2&G3	Mutant	codel	no alteration	no alteration	non-homdel	no alteration	no alteration	no alteration	no alteration	No chr 19/20 gain	No combined CNA	WT	WT	WT	Methylated
TCGA-DU-A7TI-01A-11R-A33Z-07	29.0806	4.91076	TCGA-DU-A7TI	Male	32	Progressive Disease	1	1183	1	1183	NA	NA	NA	non-codel	no alteration	no alteration	non-homdel	no alteration	no alteration	no alteration	no alteration	No chr 19/20 gain	No combined CNA	WT	NA	NA	Methylated
TCGA-E1-A7YD-01A-11R-A34F-07	55.4266	5.8183	TCGA-E1-A7YD	Male	57	Stable Disease	1	435	1	435	Glioblastoma,IDH WT	G4	WT	non-codel	no alteration	no alteration	non-homdel	no alteration	AMP (driver)	no alteration	no alteration	No chr 19/20 gain	Gain chr 7 & loss chr 10	WT	WT	WT	Unmethylated
TCGA-EZ-7264-01A-11R-2027-07	8.4326	3.23766	TCGA-EZ-7264	Female	47	Stable Disease	0	1201	0	1201	Oligodendroglioma, IDH mut, 1p/19q-codel	G2&G3	Mutant	codel	no alteration	no alteration	non-homdel	no alteration	no alteration	no alteration	no alteration	No chr 19/20 gain	No combined CNA	WT	WT	WT	Methylated
TCGA-HT-7677-01A-11R-2256-07	42.9287	5.45709	TCGA-HT-7677	Male	53	Stable Disease	0	494	0	494	Oligodendroglioma, IDH mut, 1p/19q-codel	G2&G3	Mutant	codel	no alteration	no alteration	non-homdel	no alteration	no alteration	no alteration	no alteration	No chr 19/20 gain	No combined CNA	WT	WT	WT	Methylated
TCGA-FG-8181-01A-11R-2256-07	13.8262	3.89008	TCGA-FG-8181	Male	23	Stable Disease	0	862	0	862	Glioblastoma,IDH WT	G4	WT	non-codel	no alteration	no alteration	non-homdel	no alteration	no alteration	no alteration	no alteration	No chr 19/20 gain	No combined CNA	WT	WT	WT	Unmethylated
TCGA-S9-A6WD-01A-12R-A33Z-07	32.0915	5.04839	TCGA-S9-A6WD	Male	58	Partial Remission/Response	0	2289	0	2289	Oligodendroglioma, IDH mut, 1p/19q-codel	G2&G3	Mutant	codel	no alteration	no alteration	non-homdel	no alteration	no alteration	no alteration	no alteration	No chr 19/20 gain	No combined CNA	WT	WT	WT	Methylated
TCGA-HT-7694-01A-11R-2256-07	85.871	6.4408	TCGA-HT-7694	Male	60	Complete Remission/Response	0	210	0	210	Oligodendroglioma, IDH mut, 1p/19q-codel	G2&G3	Mutant	codel	no alteration	no alteration	non-homdel	no alteration	no alteration	no alteration	no alteration	No chr 19/20 gain	No combined CNA	WT	WT	WT	Methylated
TCGA-HT-A74L-01A-11R-A32Q-07	12.5491	3.76013	TCGA-HT-A74L	Female	22	Partial Remission/Response	0	336	0	336	Oligodendroglioma, IDH mut, 1p/19q-codel	G2&G3	Mutant	codel	no alteration	no alteration	non-homdel	no alteration	no alteration	no alteration	no alteration	No chr 19/20 gain	No combined CNA	WT	WT	WT	Methylated
TCGA-S9-A89Z-01A-11R-A36H-07	17.5722	4.21507	TCGA-S9-A89Z	Male	40	Partial Remission/Response	0	623	0	623	Astroctyoma, IDH mut	G4	Mutant	non-codel	HOMDEL (driver)	HOMDEL (driver)	homdel	R858W	no alteration	no alteration	no alteration	No chr 19/20 gain	No combined CNA	WT	WT	WT	Methylated
TCGA-HT-A74O-01A-11R-A32Q-07	24.1128	4.65035	TCGA-HT-A74O	Male	34	[Not Available]	0	3	0	3	Astroctyoma, IDH mut	G2&G3	Mutant	non-codel	no alteration	no alteration	non-homdel	HOMDEL	no alteration	no alteration	no alteration	No chr 19/20 gain	No combined CNA	WT	WT	Mutant	Methylated
TCGA-P5-A77X-01A-11R-A32Q-07	12.9541	3.80262	TCGA-P5-A77X	Female	55	Complete Remission/Response	0	105	0	105	Oligodendroglioma, IDH mut, 1p/19q-codel	G2&G3	Mutant	codel	no alteration	no alteration	non-homdel	no alteration	no alteration	no alteration	no alteration	No chr 19/20 gain	No combined CNA	WT	WT	WT	Methylated
TCGA-FG-A713-01A-11R-A32Q-07	72.2077	6.19392	TCGA-FG-A713	Female	74	Complete Remission/Response	0	622	0	622	Oligodendroglioma, IDH mut, 1p/19q-codel	G2&G3	Mutant	codel	no alteration	no alteration	non-homdel	no alteration	no alteration	no alteration	no alteration	No chr 19/20 gain	No combined CNA	WT	WT	Mutant	Methylated
TCGA-FG-5965-01B-11R-1896-07	14.3127	3.93666	TCGA-FG-5965	Female	39	Stable Disease	1	1120	1	1120	Astroctyoma, IDH mut	G4	Mutant	non-codel	HOMDEL (driver)	HOMDEL (driver)	homdel	no alteration	no alteration	no alteration	no alteration	No chr 19/20 gain	No combined CNA	WT	WT	Mutant	Methylated
TCGA-HT-8015-01B-11R-A28M-07	80.0132	6.34009	TCGA-HT-8015	Male	21	Complete Remission/Response	0	3	0	3	Glioblastoma,IDH WT	G4	WT	non-codel	no alteration	no alteration	non-homdel	no alteration	no alteration	no alteration	no alteration	No chr 19/20 gain	No combined CNA	WT	WT	WT	Unmethylated
TCGA-HT-7481-01A-11R-2027-07	119.034	6.9073	TCGA-HT-7481	Male	39	Stable Disease	0	2918	0	2918	Oligodendroglioma, IDH mut, 1p/19q-codel	G2&G3	Mutant	codel	no alteration	no alteration	non-homdel	no alteration	no alteration	no alteration	no alteration	No chr 19/20 gain	No combined CNA	WT	WT	WT	Methylated
TCGA-TM-A84S-01A-11R-A36H-07	21.1339	4.46819	TCGA-TM-A84S	Male	36	Complete Remission/Response	0	454	0	454	Oligodendroglioma, IDH mut, 1p/19q-codel	G2&G3	Mutant	codel	no alteration	no alteration	non-homdel	no alteration	no alteration	no alteration	no alteration	No chr 19/20 gain	No combined CNA	WT	WT	WT	Methylated
TCGA-TM-A84T-01A-11R-A36H-07	30.8844	4.99478	TCGA-TM-A84T	Male	19	Stable Disease	0	724	0	724	Astroctyoma, IDH mut	G2&G3	Mutant	non-codel	no alteration	no alteration	non-homdel	no alteration	no alteration	no alteration	no alteration	No chr 19/20 gain	No combined CNA	WT	WT	Mutant	Methylated
TCGA-HT-8105-01A-11R-2404-07	9.0886	3.33465	TCGA-HT-8105	Male	54	Stable Disease	0	190	0	190	Oligodendroglioma, IDH mut, 1p/19q-codel	G2&G3	Mutant	codel	no alteration	no alteration	non-homdel	no alteration	no alteration	no alteration	no alteration	No chr 19/20 gain	No combined CNA	WT	WT	WT	Methylated
TCGA-HT-7606-01A-11R-2090-07	29.8518	4.94728	TCGA-HT-7606	Female	30	Complete Remission/Response	0	526	0	526	Astroctyoma, IDH mut	G2&G3	Mutant	non-codel	no alteration	no alteration	non-homdel	no alteration	no alteration	no alteration	no alteration	No chr 19/20 gain	No combined CNA	WT	WT	WT	Unmethylated
TCGA-FG-A70Z-01A-12R-A33Z-07	35.3664	5.18453	TCGA-FG-A70Z	Female	53	Stable Disease	0	328	0	328	Glioblastoma,IDH WT	G4	WT	non-codel	no alteration	no alteration	non-homdel	no alteration	A289V (driver), Q1143*, AMP (driver)	no alteration	no alteration	No chr 19/20 gain	Gain chr 7 & loss chr 10	WT	WT	WT	Methylated
TCGA-WY-A85D-01A-11R-A36H-07	19.6502	4.36808	TCGA-WY-A85D	Male	60	Partial Remission/Response	0	1147	0	1147	Astroctyoma, IDH mut	G2&G3	Mutant	non-codel	no alteration	no alteration	non-homdel	no alteration	no alteration	no alteration	no alteration	No chr 19/20 gain	No combined CNA	WT	WT	Mutant	Unmethylated
TCGA-P5-A5F1-01A-11R-A28M-07	17.9123	4.24125	TCGA-P5-A5F1	Male	30	[Not Available]	0	179	0	179	Astroctyoma, IDH mut	G2&G3	Mutant	non-codel	no alteration	no alteration	non-homdel	no alteration	no alteration	no alteration	no alteration	No chr 19/20 gain	No combined CNA	WT	WT	Mutant	Unmethylated
TCGA-S9-A7IZ-01A-11R-A34F-07	17.7364	4.22777	TCGA-S9-A7IZ	Female	48	Partial Remission/Response	0	608	0	608	Astroctyoma, IDH mut	G2&G3	Mutant	non-codel	no alteration	no alteration	non-homdel	no alteration	no alteration	no alteration	no alteration	No chr 19/20 gain	No combined CNA	WT	WT	Mutant	Methylated
TCGA-DB-A75M-01A-11R-A32Q-07	37.2537	5.25753	TCGA-DB-A75M	Male	47	Complete Remission/Response	0	544	0	544	Astroctyoma, IDH mut	G2&G3	Mutant	non-codel	no alteration	no alteration	non-homdel	no alteration	no alteration	no alteration	no alteration	No chr 19/20 gain	No combined CNA	WT	WT	Mutant	Methylated
TCGA-HT-A614-01A-11R-A29R-07	76.0727	6.26815	TCGA-HT-A614	Male	47	Partial Remission/Response	0	82	0	82	Astroctyoma, IDH mut	G2&G3	Mutant	non-codel	no alteration	no alteration	non-homdel	no alteration	no alteration	no alteration	no alteration	No chr 19/20 gain	No combined CNA	WT	WT	Mutant	Methylated
TCGA-DU-6396-01A-11R-1708-07	33.171	5.0947	TCGA-DU-6396	Female	31	Progressive Disease	1	2286	1	2286	Astroctyoma, IDH mut	G2&G3	Mutant	non-codel	no alteration	no alteration	non-homdel	no alteration	no alteration	no alteration	no alteration	No chr 19/20 gain	No combined CNA	WT	WT	Mutant	Methylated
TCGA-DB-5274-01A-01R-1470-07	12.1317	3.71498	TCGA-DB-5274	Female	37	Complete Remission/Response	0	2289	0	2289	Oligodendroglioma, IDH mut, 1p/19q-codel	G2&G3	Mutant	codel	no alteration	no alteration	non-homdel	no alteration	no alteration	no alteration	no alteration	No chr 19/20 gain	No combined CNA	WT	WT	WT	Methylated
TCGA-TQ-A8XE-01A-11R-A36H-07	7.3164	3.05596	TCGA-TQ-A8XE	Female	42	Partial Remission/Response	1	954	1	954	Astroctyoma, IDH mut	G2&G3	Mutant	non-codel	no alteration	no alteration	non-homdel	no alteration	no alteration	no alteration	no alteration	No chr 19/20 gain	No combined CNA	WT	WT	WT	Methylated
TCGA-FG-7638-01B-12R-2090-07	24.243	4.65781	TCGA-FG-7638	Female	31	Stable Disease	0	686	0	686	Oligodendroglioma, IDH mut, 1p/19q-codel	G2&G3	Mutant	codel	no alteration	no alteration	non-homdel	no alteration	no alteration	no alteration	no alteration	No chr 19/20 gain	No combined CNA	WT	WT	Mutant	Methylated
TCGA-E1-A7YV-01A-11R-A34R-07	4.5773	2.47957	TCGA-E1-A7YV	Female	26	Progressive Disease	1	987	1	987	Astroctyoma, IDH mut	G2&G3	Mutant	non-codel	no alteration	no alteration	non-homdel	no alteration	no alteration	no alteration	no alteration	No chr 19/20 gain	No combined CNA	WT	WT	Mutant	Methylated
TCGA-DH-A7UV-01A-12R-A34F-07	25.6936	4.73842	TCGA-DH-A7UV	Male	49	Stable Disease	0	566	0	566	Astroctyoma, IDH mut	G2&G3	Mutant	non-codel	no alteration	no alteration	non-homdel	no alteration	no alteration	no alteration	no alteration	No chr 19/20 gain	No combined CNA	WT	WT	Mutant	Methylated
TCGA-TQ-A7RK-02A-11R-A36H-07	52.5528	5.74289	TCGA-TQ-A7RK	Male	29	Complete Remission/Response	0	1341	0	1341	Astroctyoma, IDH mut	G2&G3	Mutant	non-codel	no alteration	no alteration	non-homdel	no alteration	no alteration	no alteration	no alteration	No chr 19/20 gain	No combined CNA	WT	WT	Mutant	Methylated
TCGA-S9-A6TS-01A-12R-A33Z-07	12.9855	3.80586	TCGA-S9-A6TS	Female	48	Progressive Disease	1	1891	1	1891	Astroctyoma, IDH mut	G2&G3	Mutant	non-codel	no alteration	no alteration	non-homdel	no alteration	no alteration	no alteration	no alteration	No chr 19/20 gain	No combined CNA	WT	WT	Mutant	Methylated
TCGA-HT-7610-01A-21R-2090-07	32.9569	5.08563	TCGA-HT-7610	Female	25	Stable Disease	0	1706	0	1706	Astroctyoma, IDH mut	G2&G3	Mutant	non-codel	no alteration	no alteration	non-homdel	no alteration	no alteration	no alteration	no alteration	No chr 19/20 gain	No combined CNA	WT	WT	Mutant	Methylated
TCGA-E1-5303-01A-01R-1470-07	71.7956	6.18578	TCGA-E1-5303	Male	38	Progressive Disease	1	2052	1	2052	Astroctyoma, IDH mut	G2&G3	Mutant	non-codel	no alteration	no alteration	non-homdel	no alteration	no alteration	no alteration	no alteration	No chr 19/20 gain	No combined CNA	WT	WT	Mutant	Methylated
TCGA-HW-7487-01A-11R-2027-07	51.5286	5.71503	TCGA-HW-7487	Male	39	Progressive Disease	0	1382	0	1382	Oligodendroglioma, IDH mut, 1p/19q-codel	G2&G3	Mutant	codel	no alteration	no alteration	non-homdel	no alteration	no alteration	no alteration	no alteration	No chr 19/20 gain	No combined CNA	WT	WT	WT	Methylated
TCGA-HW-7495-01A-11R-2027-07	122.844	6.95238	TCGA-HW-7495	Female	45	Progressive Disease	0	1078	0	1078	Oligodendroglioma, IDH mut, 1p/19q-codel	G2&G3	Mutant	codel	no alteration	no alteration	non-homdel	no alteration	no alteration	no alteration	no alteration	No chr 19/20 gain	No combined CNA	WT	WT	WT	Methylated
TCGA-DU-6410-01A-11R-1896-07	2.9763	1.99143	TCGA-DU-6410	Male	56	[Not Available]	0	242	0	242	Oligodendroglioma, IDH mut, 1p/19q-codel	G2&G3	Mutant	codel	no alteration	no alteration	non-homdel	no alteration	no alteration	no alteration	no alteration	No chr 19/20 gain	No combined CNA	WT	WT	WT	Methylated
TCGA-DU-7008-01A-11R-2027-07	49.9801	5.67186	TCGA-DU-7008	Female	41	Progressive Disease	0	4752	0	4752	Astroctyoma, IDH mut	G2&G3	Mutant	non-codel	no alteration	no alteration	non-homdel	no alteration	no alteration	no alteration	no alteration	No chr 19/20 gain	No combined CNA	WT	WT	Mutant	Methylated
TCGA-QH-A870-01A-11R-A36H-07	14.3381	3.93905	TCGA-QH-A870	Female	38	Complete Remission/Response	0	395	0	395	Astroctyoma, IDH mut	G2&G3	Mutant	non-codel	no alteration	no alteration	non-homdel	no alteration	no alteration	no alteration	no alteration	No chr 19/20 gain	No combined CNA	WT	WT	Mutant	Methylated
TCGA-S9-A7R4-01A-12R-A34R-07	9.459	3.38667	TCGA-S9-A7R4	Male	46	Partial Remission/Response	0	914	0	914	Astroctyoma, IDH mut	G2&G3	Mutant	non-codel	no alteration	no alteration	non-homdel	no alteration	no alteration	no alteration	no alteration	No chr 19/20 gain	No combined CNA	WT	WT	WT	Methylated
TCGA-HT-7478-01A-11R-2027-07	21.2794	4.47764	TCGA-HT-7478	Male	36	Complete Remission/Response	0	194	0	194	Astroctyoma, IDH mut	G2&G3	Mutant	non-codel	no alteration	no alteration	non-homdel	no alteration	no alteration	no alteration	no alteration	No chr 19/20 gain	No combined CNA	WT	WT	Mutant	Unmethylated
TCGA-DU-7302-01A-11R-2090-07	11.9712	3.69724	TCGA-DU-7302	Female	48	Progressive Disease	0	1834	0	1834	Oligodendroglioma, IDH mut, 1p/19q-codel	G2&G3	Mutant	codel	no alteration	no alteration	non-homdel	no alteration	no alteration	no alteration	no alteration	No chr 19/20 gain	No combined CNA	WT	WT	WT	Methylated
TCGA-HT-8011-01A-11R-2403-07	5.3849	2.67466	TCGA-HT-8011	Male	55	Stable Disease	0	494	0	494	Glioblastoma,IDH WT	G4	WT	non-codel	HOMDEL (driver)	HOMDEL (driver)	homdel	no alteration	no alteration	no alteration	no alteration	No chr 19/20 gain	Gain chr 7 & loss chr 10	WT	WT	WT	Unmethylated
TCGA-HT-A5R5-01A-11R-A28M-07	59.0144	5.90724	TCGA-HT-A5R5	Female	33	Complete Remission/Response	0	4	0	4	Astroctyoma, IDH mut	G2&G3	Mutant	non-codel	no alteration	no alteration	non-homdel	no alteration	no alteration	no alteration	no alteration	No chr 19/20 gain	No combined CNA	WT	WT	Mutant	Methylated
TCGA-DH-5142-01A-01R-1470-07	36.5579	5.23104	TCGA-DH-5142	Male	29	Stable Disease	0	1943	0	1943	Astroctyoma, IDH mut	G2&G3	Mutant	non-codel	no alteration	no alteration	non-homdel	no alteration	AMP (driver)	no alteration	no alteration	No chr 19/20 gain	No combined CNA	WT	WT	Mutant	Methylated
TCGA-HT-7695-01A-11R-2256-07	47.8134	5.60921	TCGA-HT-7695	Female	29	Complete Remission/Response	0	442	0	442	Oligodendroglioma, IDH mut, 1p/19q-codel	G2&G3	Mutant	codel	no alteration	no alteration	non-homdel	no alteration	no alteration	no alteration	no alteration	No chr 19/20 gain	No combined CNA	WT	WT	WT	Methylated
TCGA-QH-A65R-01A-21R-A31N-07	3.0977	2.03481	TCGA-QH-A65R	Female	38	Partial Remission/Response	0	461	0	461	Oligodendroglioma, IDH mut, 1p/19q-codel	G2&G3	Mutant	codel	no alteration	no alteration	non-homdel	no alteration	no alteration	no alteration	no alteration	No chr 19/20 gain	No combined CNA	WT	WT	WT	Methylated
TCGA-HT-7691-01A-11R-2256-07	5.9009	2.78678	TCGA-HT-7691	Female	31	[Not Available]	0	3	0	3	Glioblastoma,IDH WT	G4	WT	non-codel	no alteration	no alteration	non-homdel	no alteration	no alteration	no alteration	no alteration	No chr 19/20 gain	No combined CNA	Fusion	WT	WT	Unmethylated
TCGA-FG-6692-01A-11R-1896-07	36.5574	5.23103	TCGA-FG-6692	Male	63	Stable Disease	1	561	1	561	Glioblastoma,IDH WT	G4	WT	non-codel	no alteration	no alteration	non-homdel	no alteration	A289V (driver), AMP (driver)	no alteration	no alteration	No chr 19/20 gain	Gain chr 7 & loss chr 10	WT	WT	WT	Methylated
TCGA-HT-7605-01A-11R-2090-07	58.1217	5.88562	TCGA-HT-7605	Male	38	[Not Available]	0	139	0	139	Oligodendroglioma, IDH mut, 1p/19q-codel	G2&G3	Mutant	codel	no alteration	no alteration	non-homdel	no alteration	no alteration	no alteration	no alteration	No chr 19/20 gain	No combined CNA	WT	WT	WT	Methylated
TCGA-S9-A7QW-01A-11R-A34F-07	25.1667	4.70966	TCGA-S9-A7QW	Female	54	Complete Remission/Response	0	458	0	458	Astroctyoma, IDH mut	G2&G3	Mutant	non-codel	no alteration	no alteration	non-homdel	no alteration	no alteration	no alteration	no alteration	No chr 19/20 gain	No combined CNA	WT	WT	Mutant	Methylated
TCGA-HT-7468-01A-11R-2027-07	13.1037	3.818	TCGA-HT-7468	Male	30	Stable Disease	0	203	0	203	Oligodendroglioma, IDH mut, 1p/19q-codel	G2&G3	Mutant	codel	no alteration	no alteration	non-homdel	no alteration	no alteration	no alteration	no alteration	No chr 19/20 gain	No combined CNA	WT	WT	WT	Methylated
TCGA-TM-A84H-01A-11R-A36H-07	42.8912	5.45586	TCGA-TM-A84H	Female	44	Complete Remission/Response	0	926	0	926	Astroctyoma, IDH mut	G2&G3	Mutant	non-codel	no alteration	no alteration	non-homdel	no alteration	no alteration	no alteration	no alteration	No chr 19/20 gain	No combined CNA	WT	WT	Mutant	Methylated
TCGA-TQ-A7RF-01A-11R-A33Z-07	4.9113	2.56348	TCGA-TQ-A7RF	Female	27	Partial Remission/Response	0	650	0	650	Astroctyoma, IDH mut	G2&G3	Mutant	non-codel	no alteration	no alteration	non-homdel	no alteration	no alteration	no alteration	AMP	No chr 19/20 gain	No combined CNA	WT	WT	WT	Unmethylated
TCGA-HT-7470-01A-12R-2090-07	92.423	6.54571	TCGA-HT-7470	Male	37	Complete Remission/Response	1	1220	0	1220	Astroctyoma, IDH mut	G2&G3	Mutant	non-codel	no alteration	no alteration	non-homdel	no alteration	no alteration	no alteration	no alteration	No chr 19/20 gain	No combined CNA	WT	WT	Mutant	Methylated
TCGA-TM-A84B-01A-11R-A36H-07	191.678	7.59005	TCGA-TM-A84B	Male	40	Progressive Disease	1	758	1	758	Glioblastoma,IDH WT	G4	WT	non-codel	no alteration	no alteration	non-homdel	no alteration	no alteration	no alteration	no alteration	No chr 19/20 gain	Gain chr 7 & loss chr 10	WT	WT	WT	Unmethylated
TCGA-DU-6403-01A-11R-1708-07	127.876	7.00984	TCGA-DU-6403	Female	60	[Not Available]	1	354	1	354	Glioblastoma,IDH WT	G4	WT	non-codel	no alteration	no alteration	non-homdel	no alteration	AMP (driver)	no alteration	no alteration	No chr 19/20 gain	Gain chr 7 & loss chr 10	WT	WT	WT	Unmethylated
TCGA-DU-A5TR-01A-11R-A28M-07	20.8365	4.44867	TCGA-DU-A5TR	Male	51	[Discrepancy]	0	908	0	908	Astroctyoma, IDH mut	G2&G3	Mutant	non-codel	no alteration	no alteration	non-homdel	no alteration	no alteration	no alteration	no alteration	No chr 19/20 gain	No combined CNA	WT	WT	Mutant	Methylated
TCGA-FG-6690-01A-11R-1896-07	8.2731	3.21305	TCGA-FG-6690	Male	70	Stable Disease	0	1294	0	1294	Astroctyoma, IDH mut	G2&G3	Mutant	non-codel	no alteration	no alteration	non-homdel	no alteration	no alteration	no alteration	no alteration	No chr 19/20 gain	No combined CNA	WT	WT	Mutant	Methylated
TCGA-DH-5141-01A-01R-1470-07	19.4873	4.35666	TCGA-DH-5141	Male	32	Stable Disease	0	968	0	968	Oligodendroglioma, IDH mut, 1p/19q-codel	G2&G3	Mutant	codel	no alteration	no alteration	non-homdel	no alteration	no alteration	no alteration	no alteration	No chr 19/20 gain	No combined CNA	WT	WT	WT	Methylated
TCGA-S9-A6U1-01A-21R-A33Z-07	55.022	5.80792	TCGA-S9-A6U1	Female	22	Complete Remission/Response	0	785	0	785	Astroctyoma, IDH mut	G2&G3	Mutant	non-codel	no alteration	no alteration	non-homdel	no alteration	no alteration	no alteration	no alteration	No chr 19/20 gain	No combined CNA	WT	WT	Mutant	Methylated
TCGA-FG-8187-01A-11R-2256-07	120.453	6.92425	TCGA-FG-8187	Male	31	Complete Remission/Response	0	611	0	611	Oligodendroglioma, IDH mut, 1p/19q-codel	G2&G3	Mutant	codel	no alteration	no alteration	non-homdel	no alteration	no alteration	no alteration	no alteration	No chr 19/20 gain	No combined CNA	WT	WT	WT	Methylated
TCGA-CS-6668-01A-11R-1896-07	9.1041	3.33687	TCGA-CS-6668	Female	57	Stable Disease	0	1519	0	1519	Oligodendroglioma, IDH mut, 1p/19q-codel	G2&G3	Mutant	codel	no alteration	no alteration	non-homdel	no alteration	no alteration	no alteration	no alteration	No chr 19/20 gain	No combined CNA	WT	WT	WT	Methylated
TCGA-HT-7602-01A-21R-2090-07	120.823	6.92865	TCGA-HT-7602	Male	21	[Not Available]	0	908	0	908	Astroctyoma, IDH mut	G2&G3	Mutant	non-codel	no alteration	no alteration	non-homdel	no alteration	no alteration	no alteration	no alteration	No chr 19/20 gain	No combined CNA	WT	WT	WT	Methylated
TCGA-P5-A780-01A-12R-A32Q-07	44.1419	5.4964	TCGA-P5-A780	Female	44	Complete Remission/Response	0	72	0	72	Astroctyoma, IDH mut	G4	Mutant	non-codel	HOMDEL (driver)	HOMDEL (driver)	homdel	HOMDEL	no alteration	no alteration	no alteration	No chr 19/20 gain	No combined CNA	WT	WT	WT	Methylated
TCGA-DU-A5TY-01A-11R-A28M-07	79.3388	6.32803	TCGA-DU-A5TY	Female	46	[Discrepancy]	1	1033	1	1033	Glioblastoma,IDH WT	G4	WT	non-codel	no alteration	no alteration	non-homdel	no alteration	no alteration	no alteration	no alteration	No chr 19/20 gain	Gain chr 7 & loss chr 10	WT	WT	WT	Methylated
TCGA-DU-7299-01A-21R-2027-07	58.7488	5.90084	TCGA-DU-7299	Male	33	Progressive Disease	1	1339	1	1339	Astroctyoma, IDH mut	G2&G3	Mutant	non-codel	no alteration	no alteration	non-homdel	no alteration	no alteration	no alteration	no alteration	No chr 19/20 gain	No combined CNA	WT	WT	WT	Methylated
TCGA-HW-A5KL-01A-11R-A27Q-07	11.594	3.65466	TCGA-HW-A5KL	Female	42	Stable Disease	0	878	0	878	Astroctyoma, IDH mut	G2&G3	Mutant	non-codel	no alteration	no alteration	non-homdel	no alteration	no alteration	no alteration	no alteration	No chr 19/20 gain	No combined CNA	WT	WT	Mutant	Methylated
TCGA-FG-8189-01B-11R-A28M-07	32.9265	5.08434	TCGA-FG-8189	Female	33	Stable Disease	0	685	0	685	Astroctyoma, IDH mut	G2&G3	Mutant	non-codel	no alteration	no alteration	non-homdel	no alteration	no alteration	no alteration	no alteration	No chr 19/20 gain	No combined CNA	WT	WT	WT	Methylated
TCGA-VM-A8CF-01A-11R-A36H-07	11.0167	3.58697	TCGA-VM-A8CF	Female	44	[Unknown]	0	609	0	609	Astroctyoma, IDH mut	G2&G3	Mutant	non-codel	no alteration	no alteration	non-homdel	no alteration	no alteration	no alteration	no alteration	No chr 19/20 gain	No combined CNA	WT	WT	Mutant	Methylated
TCGA-S9-A6WI-01A-21R-A33Z-07	70.9298	6.16852	TCGA-S9-A6WI	Female	56	Partial Remission/Response	0	2585	0	2585	Astroctyoma, IDH mut	G2&G3	Mutant	non-codel	no alteration	no alteration	non-homdel	no alteration	no alteration	no alteration	no alteration	No chr 19/20 gain	No combined CNA	WT	WT	WT	Methylated
TCGA-DB-5281-01A-01R-1470-07	21.7434	4.50738	TCGA-DB-5281	Male	61	Stable Disease	0	2381	0	2381	Astroctyoma, IDH mut	G2&G3	Mutant	non-codel	no alteration	no alteration	non-homdel	no alteration	no alteration	no alteration	no alteration	No chr 19/20 gain	No combined CNA	WT	WT	Mutant	Methylated
TCGA-DU-7019-01A-11R-2027-07	9.9411	3.45169	TCGA-DU-7019	Male	39	Stable Disease	0	800	0	800	Astroctyoma, IDH mut	G2&G3	Mutant	non-codel	no alteration	no alteration	non-homdel	no alteration	no alteration	no alteration	no alteration	No chr 19/20 gain	No combined CNA	WT	WT	WT	Methylated
TCGA-VV-A86M-01A-11R-A36H-07	3.6705	2.22358	TCGA-VV-A86M	Female	36	[Unknown]	0	487	0	487	Astroctyoma, IDH mut	G2&G3	Mutant	non-codel	no alteration	no alteration	non-homdel	no alteration	no alteration	no alteration	no alteration	No chr 19/20 gain	No combined CNA	WT	WT	WT	Methylated
TCGA-DB-A75O-01A-11R-A32Q-07	36.9936	5.24768	TCGA-DB-A75O	Male	29	Partial Remission/Response	0	935	0	935	Astroctyoma, IDH mut	G2&G3	Mutant	non-codel	no alteration	no alteration	non-homdel	no alteration	no alteration	no alteration	no alteration	No chr 19/20 gain	No combined CNA	WT	WT	WT	Methylated
TCGA-RY-A843-01A-11R-A36H-07	28.872	4.90072	TCGA-RY-A843	Male	30	[Not Available]	0	63	0	63	Astroctyoma, IDH mut	G2&G3	Mutant	non-codel	no alteration	no alteration	non-homdel	no alteration	no alteration	no alteration	no alteration	No chr 19/20 gain	No combined CNA	WT	WT	WT	Methylated
TCGA-TM-A7CA-01A-21R-A33Z-07	19.9583	4.38945	TCGA-TM-A7CA	Male	44	Complete Remission/Response	0	1058	0	1058	Astroctyoma, IDH mut	G2&G3	Mutant	non-codel	no alteration	no alteration	non-homdel	no alteration	no alteration	no alteration	no alteration	No chr 19/20 gain	No combined CNA	WT	WT	Mutant	Methylated
TCGA-DB-A64V-01A-11R-A29R-07	77.9324	6.30255	TCGA-DB-A64V	Male	54	Stable Disease	0	889	0	889	Oligodendroglioma, IDH mut, 1p/19q-codel	G2&G3	Mutant	codel	no alteration	no alteration	non-homdel	no alteration	no alteration	no alteration	no alteration	No chr 19/20 gain	No combined CNA	WT	WT	WT	Methylated
TCGA-HT-7477-01B-11R-A28M-07	19.9235	4.38705	TCGA-HT-7477	Male	62	Complete Remission/Response	0	738	0	738	Astroctyoma, IDH mut	G4	Mutant	non-codel	HOMDEL (driver)	HOMDEL (driver)	homdel	no alteration	no alteration	no alteration	no alteration	No chr 19/20 gain	No combined CNA	WT	WT	Mutant	Methylated
TCGA-DU-5853-01A-11R-1896-07	29.2219	4.91752	TCGA-DU-5853	Male	29	Stable Disease	0	407	0	407	Astroctyoma, IDH mut	G2&G3	Mutant	non-codel	no alteration	no alteration	non-homdel	no alteration	no alteration	no alteration	no alteration	No chr 19/20 gain	No combined CNA	WT	WT	Mutant	Methylated
TCGA-HT-7480-01A-11R-2090-07	21.6588	4.502	TCGA-HT-7480	Male	33	Stable Disease	0	2287	0	2287	Oligodendroglioma, IDH mut, 1p/19q-codel	G2&G3	Mutant	codel	no alteration	no alteration	non-homdel	no alteration	no alteration	no alteration	no alteration	No chr 19/20 gain	No combined CNA	WT	WT	WT	Methylated
TCGA-P5-A730-01A-11R-A32Q-07	24.3891	4.66614	TCGA-P5-A730	Male	22	Complete Remission/Response	0	333	0	333	Oligodendroglioma, IDH mut, 1p/19q-codel	G2&G3	Mutant	codel	no alteration	no alteration	non-homdel	no alteration	no alteration	no alteration	no alteration	No chr 19/20 gain	No combined CNA	WT	WT	WT	Methylated
TCGA-S9-A6U2-01A-21R-A33Z-07	8.8003	3.29283	TCGA-S9-A6U2	Female	48	Partial Remission/Response	0	908	0	908	Oligodendroglioma, IDH mut, 1p/19q-codel	G2&G3	Mutant	codel	no alteration	no alteration	non-homdel	no alteration	no alteration	no alteration	no alteration	No chr 19/20 gain	No combined CNA	WT	WT	WT	Methylated
TCGA-VM-A8C9-01A-11R-A36H-07	6.8064	2.96466	TCGA-VM-A8C9	Female	37	Complete Remission/Response	0	1314	0	1314	Glioblastoma,IDH WT	G4	WT	non-codel	no alteration	no alteration	non-homdel	no alteration	no alteration	no alteration	no alteration	No chr 19/20 gain	No combined CNA	WT	WT	WT	Unmethylated
TCGA-DU-7294-01A-11R-2027-07	36.5459	5.23058	TCGA-DU-7294	Female	53	Stable Disease	0	2869	0	2869	Oligodendroglioma, IDH mut, 1p/19q-codel	G2&G3	Mutant	codel	no alteration	no alteration	non-homdel	no alteration	no alteration	no alteration	no alteration	No chr 19/20 gain	No combined CNA	WT	WT	WT	Methylated
TCGA-S9-A7QX-01A-11R-A34F-07	12.8005	3.78665	TCGA-S9-A7QX	Female	36	Partial Remission/Response	0	564	0	564	Astroctyoma, IDH mut	G2&G3	Mutant	non-codel	no alteration	no alteration	non-homdel	no alteration	no alteration	no alteration	no alteration	No chr 19/20 gain	No combined CNA	WT	WT	Mutant	Methylated
TCGA-HT-7472-01A-11R-2027-07	38.4525	5.30204	TCGA-HT-7472	Male	38	Stable Disease	0	1	0	1	Astroctyoma, IDH mut	G2&G3	Mutant	non-codel	no alteration	no alteration	non-homdel	no alteration	no alteration	no alteration	no alteration	No chr 19/20 gain	No combined CNA	WT	WT	Mutant	Methylated
TCGA-DU-6399-01A-12R-1708-07	29.1181	4.91256	TCGA-DU-6399	Male	54	Progressive Disease	1	2000	1	2000	Astroctyoma, IDH mut	G2&G3	Mutant	non-codel	no alteration	no alteration	non-homdel	no alteration	no alteration	no alteration	no alteration	No chr 19/20 gain	No combined CNA	WT	WT	Mutant	Methylated
TCGA-P5-A72W-01A-11R-A32Q-07	11.7961	3.67763	TCGA-P5-A72W	Male	35	Complete Remission/Response	0	317	0	317	Astroctyoma, IDH mut	G2&G3	Mutant	non-codel	no alteration	no alteration	non-homdel	no alteration	no alteration	no alteration	no alteration	No chr 19/20 gain	No combined CNA	WT	WT	Mutant	Unmethylated
TCGA-TQ-A7RG-01A-11R-A33Z-07	18.193	4.26251	TCGA-TQ-A7RG	Male	36	Partial Remission/Response	0	599	0	599	Oligodendroglioma, IDH mut, 1p/19q-codel	G2&G3	Mutant	codel	no alteration	no alteration	non-homdel	no alteration	no alteration	no alteration	no alteration	No chr 19/20 gain	No combined CNA	WT	WT	WT	Methylated
TCGA-QH-A6CS-01A-11R-A31N-07	182.337	7.51835	TCGA-QH-A6CS	Male	41	Stable Disease	0	588	0	588	Glioblastoma,IDH WT	G4	WT	non-codel	no alteration	no alteration	non-homdel	no alteration	no alteration	no alteration	no alteration	No chr 19/20 gain	Gain chr 7 & loss chr 10	NA	WT	WT	Unmethylated
TCGA-HT-7692-01A-12R-2256-07	6.7043	2.94566	TCGA-HT-7692	Male	43	Complete Remission/Response	0	90	0	90	Oligodendroglioma, IDH mut, 1p/19q-codel	G2&G3	Mutant	codel	no alteration	no alteration	non-homdel	no alteration	no alteration	no alteration	no alteration	No chr 19/20 gain	No combined CNA	WT	WT	WT	Methylated
TCGA-E1-5322-01A-01R-1470-07	30.763	4.98928	TCGA-E1-5322	Female	38	Stable Disease	1	3978	NA	3978	Astroctyoma, IDH mut	G2&G3	Mutant	non-codel	no alteration	no alteration	non-homdel	no alteration	no alteration	no alteration	no alteration	No chr 19/20 gain	No combined CNA	WT	WT	Mutant	Methylated
TCGA-DU-A7TG-01A-21R-A34R-07	27.8199	4.84899	TCGA-DU-A7TG	Male	40	[Unknown]	1	1351	NA	1351	Astroctyoma, IDH mut	G2&G3	Mutant	non-codel	no alteration	no alteration	non-homdel	no alteration	no alteration	no alteration	no alteration	No chr 19/20 gain	No combined CNA	WT	WT	WT	Methylated
TCGA-DU-6407-02A-12R-A36H-07	11.0719	3.59358	TCGA-DU-6407	Female	35	Progressive Disease	1	2875	1	2875	Astroctyoma, IDH mut	G4	Mutant	non-codel	HOMDEL (driver)	HOMDEL (driver)	homdel	no alteration	no alteration	no alteration	no alteration	No chr 19/20 gain	No combined CNA	WT	WT	Mutant	Methylated
TCGA-E1-A7YW-01A-11R-A34R-07	39.6363	5.3447	TCGA-E1-A7YW	Male	28	Progressive Disease	1	1120	1	1120	Astroctyoma, IDH mut	G2&G3	Mutant	non-codel	no alteration	no alteration	non-homdel	no alteration	no alteration	no alteration	no alteration	No chr 19/20 gain	No combined CNA	WT	WT	Mutant	Methylated
TCGA-DU-6407-01A-13R-1708-07	31.4355	5.0195	TCGA-DU-6407	Female	35	Progressive Disease	1	2875	1	2875	Astroctyoma, IDH mut	G4	Mutant	non-codel	HOMDEL (driver)	HOMDEL (driver)	homdel	no alteration	no alteration	no alteration	no alteration	No chr 19/20 gain	No combined CNA	WT	WT	Mutant	Methylated
TCGA-S9-A7J0-01A-11R-A34F-07	24.2689	4.65929	TCGA-S9-A7J0	Female	30	Partial Remission/Response	0	609	0	609	Astroctyoma, IDH mut	G4	Mutant	non-codel	HOMDEL (driver)	HOMDEL (driver)	homdel	no alteration	no alteration	no alteration	no alteration	No chr 19/20 gain	No combined CNA	WT	WT	WT	Methylated
TCGA-DU-5870-01A-11R-1708-07	19.5342	4.35996	TCGA-DU-5870	Female	34	Progressive Disease	0	5546	0	5546	Oligodendroglioma, IDH mut, 1p/19q-codel	G2&G3	Mutant	codel	no alteration	no alteration	non-homdel	no alteration	no alteration	no alteration	no alteration	No chr 19/20 gain	No combined CNA	WT	WT	WT	Methylated
TCGA-DU-7018-01A-11R-2027-07	0.9694	0.977756	TCGA-DU-7018	Female	57	Progressive Disease	1	933	1	933	Oligodendroglioma, IDH mut, 1p/19q-codel	G2&G3	Mutant	codel	no alteration	no alteration	non-homdel	no alteration	no alteration	no alteration	no alteration	No chr 19/20 gain	No combined CNA	WT	WT	WT	Methylated
TCGA-HT-7860-01A-11R-2403-07	332.067	8.37967	TCGA-HT-7860	Female	60	[Not Available]	0	15	0	15	Glioblastoma,IDH WT	G4	WT	non-codel	HOMDEL (driver)	HOMDEL (driver)	homdel	no alteration	no alteration	no alteration	no alteration	Gain chr 19/20	Gain chr 7 & loss chr 10	WT	WT	WT	Methylated
TCGA-HT-8107-01A-13R-2404-07	78.1388	6.30631	TCGA-HT-8107	Male	62	Stable Disease	0	14	0	14	Glioblastoma,IDH WT	G4	WT	non-codel	no alteration	no alteration	non-homdel	no alteration	R108K (driver)	no alteration	no alteration	No chr 19/20 gain	No combined CNA	WT	WT	WT	Methylated
TCGA-FG-A4MY-01A-11R-A26U-07	77.0335	6.28602	TCGA-FG-A4MY	Female	44	Stable Disease	0	721	0	721	Astroctyoma, IDH mut	G2&G3	Mutant	non-codel	no alteration	no alteration	non-homdel	no alteration	no alteration	no alteration	no alteration	No chr 19/20 gain	No combined CNA	WT	WT	Mutant	Methylated
TCGA-RY-A847-01A-11R-A36H-07	10.9713	3.58151	TCGA-RY-A847	Male	45	[Not Applicable]	0	933	0	933	Oligodendroglioma, IDH mut, 1p/19q-codel	G2&G3	Mutant	codel	no alteration	no alteration	non-homdel	no alteration	no alteration	no alteration	no alteration	No chr 19/20 gain	No combined CNA	WT	WT	WT	Methylated
TCGA-HT-7681-01A-11R-2403-07	37.7397	5.27574	TCGA-HT-7681	Female	29	Complete Remission/Response	0	1359	0	1359	Oligodendroglioma, IDH mut, 1p/19q-codel	G2&G3	Mutant	codel	no alteration	no alteration	non-homdel	no alteration	no alteration	no alteration	no alteration	No chr 19/20 gain	No combined CNA	WT	WT	WT	Methylated
TCGA-CS-4941-01A-01R-1470-07	97.5938	6.62343	TCGA-CS-4941	Male	67	Stable Disease	1	234	1	234	Glioblastoma,IDH WT	G4	WT	non-codel	no alteration	no alteration	non-homdel	no alteration	AMP (driver)	no alteration	no alteration	No chr 19/20 gain	Gain chr 7 & loss chr 10	WT	WT	WT	Methylated
TCGA-E1-A7YU-01A-11R-A34R-07	37.7663	5.27673	TCGA-E1-A7YU	Male	42	[Unknown]	1	23	1	23	Astroctyoma, IDH mut	G2&G3	Mutant	non-codel	no alteration	no alteration	non-homdel	no alteration	no alteration	no alteration	no alteration	No chr 19/20 gain	No combined CNA	WT	WT	WT	Methylated
TCGA-S9-A6WM-01A-12R-A33Z-07	163.169	7.35904	TCGA-S9-A6WM	Female	59	Partial Remission/Response	0	604	0	604	Glioblastoma,IDH WT	G4	WT	non-codel	HOMDEL (driver)	HOMDEL (driver)	homdel	no alteration	AMP (driver)	no alteration	no alteration	No chr 19/20 gain	Gain chr 7 & loss chr 10	WT	WT	WT	Unmethylated
TCGA-E1-A7YN-01A-11R-A34F-07	52.3252	5.73675	TCGA-E1-A7YN	Female	63	Stable Disease	1	727	1	727	Glioblastoma,IDH WT	G4	WT	non-codel	HOMDEL (driver)	no alteration	non-homdel	no alteration	no alteration	no alteration	no alteration	No chr 19/20 gain	Gain chr 7 & loss chr 10	WT	WT	WT	Methylated
TCGA-DU-5855-01A-11R-1708-07	18.5762	4.29103	TCGA-DU-5855	Female	49	Stable Disease	0	207	0	207	Astroctyoma, IDH mut	G2&G3	Mutant	non-codel	no alteration	no alteration	non-homdel	no alteration	no alteration	no alteration	no alteration	No chr 19/20 gain	No combined CNA	WT	WT	Mutant	Methylated
TCGA-E1-A7YH-01A-11R-A34F-07	67.4608	6.09721	TCGA-E1-A7YH	Female	47	Stable Disease	1	2835	1	2835	Astroctyoma, IDH mut	G2&G3	Mutant	non-codel	no alteration	no alteration	non-homdel	no alteration	no alteration	no alteration	no alteration	No chr 19/20 gain	No combined CNA	WT	WT	Mutant	Methylated
TCGA-HT-7603-01A-21R-2090-07	59.4276	5.91714	TCGA-HT-7603	Male	29	Complete Remission/Response	0	705	0	705	Astroctyoma, IDH mut	G2&G3	Mutant	non-codel	no alteration	no alteration	non-homdel	no alteration	no alteration	no alteration	no alteration	No chr 19/20 gain	No combined CNA	WT	WT	Mutant	Methylated
TCGA-HT-8018-01A-11R-2404-07	16.8373	4.15683	TCGA-HT-8018	Female	40	Partial Remission/Response	1	1152	0	1152	Astroctyoma, IDH mut	G2&G3	Mutant	non-codel	no alteration	no alteration	non-homdel	no alteration	no alteration	no alteration	no alteration	No chr 19/20 gain	No combined CNA	WT	WT	WT	Methylated
TCGA-P5-A5F4-01A-11R-A28M-07	17.9823	4.24658	TCGA-P5-A5F4	Female	35	Partial Remission/Response	0	231	0	231	Astroctyoma, IDH mut	G2&G3	Mutant	non-codel	no alteration	no alteration	non-homdel	no alteration	no alteration	no alteration	no alteration	No chr 19/20 gain	No combined CNA	WT	WT	WT	Methylated
TCGA-WY-A859-01A-12R-A36H-07	20.5088	4.42686	TCGA-WY-A859	Female	34	Stable Disease	0	1213	0	1213	Astroctyoma, IDH mut	G2&G3	Mutant	non-codel	no alteration	no alteration	non-homdel	no alteration	no alteration	no alteration	no alteration	No chr 19/20 gain	No combined CNA	WT	WT	WT	Methylated
TCGA-TM-A84Q-01A-11R-A36H-07	31.1587	5.00714	TCGA-TM-A84Q	Male	31	Complete Remission/Response	0	772	0	772	Astroctyoma, IDH mut	G2&G3	Mutant	non-codel	no alteration	no alteration	non-homdel	no alteration	no alteration	no alteration	no alteration	No chr 19/20 gain	No combined CNA	WT	WT	Mutant	Methylated
TCGA-DU-5872-01A-11R-1708-07	9.9209	3.44902	TCGA-DU-5872	Female	43	Progressive Disease	0	532	0	532	Astroctyoma, IDH mut	G2&G3	Mutant	non-codel	no alteration	no alteration	non-homdel	no alteration	no alteration	no alteration	no alteration	No chr 19/20 gain	No combined CNA	WT	WT	Mutant	Methylated
TCGA-DU-5872-02A-21R-A36H-07	83.7957	6.40592	TCGA-DU-5872	Female	43	Progressive Disease	0	532	0	532	Astroctyoma, IDH mut	G2&G3	Mutant	non-codel	no alteration	no alteration	non-homdel	no alteration	no alteration	no alteration	no alteration	No chr 19/20 gain	No combined CNA	WT	WT	Mutant	Methylated
TCGA-QH-A6CZ-01A-11R-A32Q-07	8.2973	3.21681	TCGA-QH-A6CZ	Male	38	Partial Remission/Response	0	279	0	279	Oligodendroglioma, IDH mut, 1p/19q-codel	G2&G3	Mutant	codel	no alteration	no alteration	non-homdel	no alteration	no alteration	no alteration	no alteration	No chr 19/20 gain	No combined CNA	WT	WT	WT	Methylated
TCGA-DU-6406-01A-11R-1708-07	5.9152	2.78977	TCGA-DU-6406	Female	59	[Not Available]	1	512	NA	512	Glioblastoma,IDH WT	G4	WT	non-codel	HOMDEL (driver)	HOMDEL (driver)	homdel	no alteration	AMP (driver)	no alteration	no alteration	Gain chr 19/20	Gain chr 7 & loss chr 10	WT	WT	WT	Unmethylated
TCGA-S9-A6WP-01A-12R-A34F-07	25.7186	4.73977	TCGA-S9-A6WP	Male	42	Partial Remission/Response	0	567	0	567	Oligodendroglioma, IDH mut, 1p/19q-codel	G2&G3	Mutant	codel	no alteration	no alteration	non-homdel	AMP (driver)	no alteration	no alteration	no alteration	No chr 19/20 gain	No combined CNA	WT	WT	WT	Methylated
TCGA-E1-5311-01A-01R-1470-07	12.012	3.70177	TCGA-E1-5311	Male	31	Stable Disease	1	4084	1	4084	Oligodendroglioma, IDH mut, 1p/19q-codel	G2&G3	Mutant	codel	no alteration	no alteration	non-homdel	no alteration	no alteration	no alteration	no alteration	No chr 19/20 gain	No combined CNA	WT	WT	WT	Methylated
TCGA-HT-A74J-01A-12R-A32Q-07	33.2249	5.09697	TCGA-HT-A74J	Male	33	Partial Remission/Response	0	320	0	320	Astroctyoma, IDH mut	G2&G3	Mutant	non-codel	no alteration	no alteration	non-homdel	no alteration	no alteration	no alteration	no alteration	No chr 19/20 gain	No combined CNA	WT	WT	Mutant	Unmethylated
TCGA-FG-8188-01A-11R-2256-07	67.3953	6.09583	TCGA-FG-8188	Male	41	Stable Disease	0	455	0	455	Astroctyoma, IDH mut	G2&G3	Mutant	non-codel	no alteration	no alteration	non-homdel	no alteration	no alteration	no alteration	no alteration	No chr 19/20 gain	No combined CNA	WT	WT	Mutant	Methylated
TCGA-P5-A5EU-01A-11R-A27Q-07	35.6611	5.19618	TCGA-P5-A5EU	Male	35	[Not Available]	0	0	0	0	Astroctyoma, IDH mut	G4	Mutant	non-codel	HOMDEL (driver)	HOMDEL (driver)	homdel	no alteration	no alteration	no alteration	no alteration	No chr 19/20 gain	No combined CNA	WT	WT	Mutant	Unmethylated
TCGA-R8-A6MO-01A-11R-A33Z-07	60.6351	5.94568	TCGA-R8-A6MO	Female	53	[Not Available]	0	993	0	993	Oligodendroglioma, IDH mut, 1p/19q-codel	G2&G3	Mutant	codel	no alteration	no alteration	non-homdel	no alteration	no alteration	no alteration	no alteration	No chr 19/20 gain	No combined CNA	WT	WT	WT	Methylated
TCGA-DB-A4XE-01A-11R-A27Q-07	54.4655	5.79352	TCGA-DB-A4XE	Female	27	Complete Remission/Response	0	1139	0	1139	Astroctyoma, IDH mut	G2&G3	Mutant	non-codel	no alteration	no alteration	non-homdel	no alteration	no alteration	no alteration	no alteration	No chr 19/20 gain	No combined CNA	WT	WT	Mutant	Methylated
TCGA-DB-A4XD-01A-11R-A27Q-07	47.8912	5.6115	TCGA-DB-A4XD	Male	32	Complete Remission/Response	0	1210	0	1210	Astroctyoma, IDH mut	G2&G3	Mutant	non-codel	no alteration	no alteration	non-homdel	no alteration	no alteration	no alteration	no alteration	No chr 19/20 gain	No combined CNA	WT	WT	Mutant	Methylated
TCGA-P5-A5EY-01A-11R-A27Q-07	37.9979	5.28532	TCGA-P5-A5EY	Male	21	[Not Available]	0	72	0	72	Glioblastoma,IDH WT	G4	WT	non-codel	no alteration	no alteration	non-homdel	no alteration	no alteration	no alteration	no alteration	No chr 19/20 gain	No combined CNA	WT	WT	WT	Unmethylated
TCGA-QH-A6CV-01A-11R-A31N-07	177.213	7.47746	TCGA-QH-A6CV	Male	51	Stable Disease	0	442	0	442	Glioblastoma,IDH WT	G4	WT	non-codel	no alteration	no alteration	non-homdel	no alteration	AMP (driver)	no alteration	no alteration	Gain chr 19/20	Gain chr 7 & loss chr 10	WT	WT	WT	Unmethylated
TCGA-DU-6400-01A-12R-1708-07	2.8483	1.94422	TCGA-DU-6400	Female	66	[Not Available]	1	37	1	37	Oligodendroglioma, IDH mut, 1p/19q-codel	G2&G3	Mutant	codel	no alteration	no alteration	non-homdel	no alteration	no alteration	no alteration	no alteration	No chr 19/20 gain	No combined CNA	WT	WT	WT	Methylated
TCGA-DU-5874-01A-11R-1708-07	0.8252	0.868055	TCGA-DU-5874	Female	62	Stable Disease	0	461	0	461	Oligodendroglioma, IDH mut, 1p/19q-codel	G2&G3	Mutant	codel	no alteration	no alteration	non-homdel	no alteration	no alteration	no alteration	no alteration	No chr 19/20 gain	No combined CNA	WT	WT	WT	Methylated
TCGA-FG-A711-01A-21R-A33Z-07	16.8299	4.15623	TCGA-FG-A711	Female	33	Progressive Disease	1	1481	1	1481	Astroctyoma, IDH mut	G2&G3	Mutant	non-codel	no alteration	no alteration	non-homdel	no alteration	no alteration	no alteration	no alteration	No chr 19/20 gain	No combined CNA	WT	WT	Mutant	Unmethylated
TCGA-TM-A84R-01A-21R-A36H-07	46.0092	5.55487	TCGA-TM-A84R	Male	46	Complete Remission/Response	0	566	0	566	Oligodendroglioma, IDH mut, 1p/19q-codel	G2&G3	Mutant	codel	no alteration	no alteration	non-homdel	no alteration	no alteration	no alteration	no alteration	No chr 19/20 gain	No combined CNA	WT	WT	WT	Methylated
TCGA-DU-6394-01A-11R-1708-07	1.6556	1.40904	TCGA-DU-6394	Male	53	Progressive Disease	1	682	1	682	Oligodendroglioma, IDH mut, 1p/19q-codel	G2&G3	Mutant	codel	no alteration	no alteration	non-homdel	no alteration	no alteration	no alteration	no alteration	No chr 19/20 gain	No combined CNA	WT	WT	WT	Methylated
TCGA-E1-A7Z3-01A-11R-A34R-07	31.1145	5.00515	TCGA-E1-A7Z3	Female	31	Progressive Disease	1	2235	1	2235	Astroctyoma, IDH mut	G4	Mutant	non-codel	HOMDEL (driver)	HOMDEL (driver)	homdel	no alteration	no alteration	no alteration	no alteration	No chr 19/20 gain	No combined CNA	WT	WT	Mutant	Methylated
TCGA-DU-A6S6-01A-21R-A32Q-07	9.1515	3.34362	TCGA-DU-A6S6	Female	35	[Discrepancy]	0	2893	0	2893	Oligodendroglioma, IDH mut, 1p/19q-codel	G2&G3	Mutant	codel	no alteration	no alteration	non-homdel	no alteration	no alteration	no alteration	no alteration	No chr 19/20 gain	No combined CNA	WT	WT	WT	Methylated
TCGA-S9-A7J1-01A-21R-A34R-07	74.9825	6.2476	TCGA-S9-A7J1	Male	43	Partial Remission/Response	0	249	0	249	Oligodendroglioma, IDH mut, 1p/19q-codel	G2&G3	Mutant	codel	no alteration	no alteration	non-homdel	no alteration	no alteration	no alteration	no alteration	No chr 19/20 gain	No combined CNA	WT	WT	WT	Methylated
TCGA-QH-A65X-01A-11R-A32Q-07	1.5424	1.34619	TCGA-QH-A65X	Female	28	Stable Disease	0	482	0	482	Oligodendroglioma, IDH mut, 1p/19q-codel	G2&G3	Mutant	codel	no alteration	no alteration	non-homdel	no alteration	no alteration	no alteration	no alteration	No chr 19/20 gain	No combined CNA	WT	WT	WT	Methylated
TCGA-DU-A7TC-01A-21R-A34R-07	5.5018	2.70084	TCGA-DU-A7TC	Male	32	[Discrepancy]	0	1137	0	1137	Astroctyoma, IDH mut	G2&G3	Mutant	non-codel	no alteration	no alteration	non-homdel	no alteration	no alteration	no alteration	no alteration	No chr 19/20 gain	No combined CNA	WT	WT	WT	Methylated
TCGA-HT-7471-01A-11R-2256-07	11.9284	3.69247	TCGA-HT-7471	Female	37	[Not Available]	0	4	0	4	Oligodendroglioma, IDH mut, 1p/19q-codel	G2&G3	Mutant	codel	no alteration	no alteration	non-homdel	no alteration	no alteration	no alteration	no alteration	No chr 19/20 gain	No combined CNA	WT	WT	WT	Methylated
TCGA-HT-7857-01A-11R-2403-07	12.1525	3.71727	TCGA-HT-7857	Female	24	[Not Available]	0	7	0	7	Glioblastoma,IDH WT	G4	WT	non-codel	HOMDEL (driver)	HOMDEL (driver)	homdel	no alteration	no alteration	no alteration	no alteration	No chr 19/20 gain	No combined CNA	WT	WT	Mutant	Unmethylated
TCGA-TQ-A7RV-02A-11R-A36H-07	26.4487	4.77867	TCGA-TQ-A7RV	Male	27	Partial Remission/Response	0	1868	0	1868	Astroctyoma, IDH mut	G2&G3	Mutant	non-codel	no alteration	no alteration	non-homdel	no alteration	no alteration	no alteration	no alteration	No chr 19/20 gain	No combined CNA	WT	WT	Mutant	Methylated
TCGA-HT-7881-01A-11R-2403-07	147.476	7.21409	TCGA-HT-7881	Male	38	Complete Remission/Response	0	1079	0	1079	Oligodendroglioma, IDH mut, 1p/19q-codel	G2&G3	Mutant	codel	no alteration	no alteration	non-homdel	no alteration	no alteration	no alteration	no alteration	No chr 19/20 gain	No combined CNA	WT	WT	WT	Methylated
TCGA-DB-A64O-01A-11R-A29R-07	97.0705	6.61575	TCGA-DB-A64O	Male	59	Stable Disease	1	775	1	775	Glioblastoma,IDH WT	G4	WT	non-codel	no alteration	no alteration	non-homdel	no alteration	no alteration	no alteration	no alteration	No chr 19/20 gain	Gain chr 7 & loss chr 10	WT	WT	WT	Unmethylated
TCGA-FG-5963-01A-11R-1708-07	140.43	7.14394	TCGA-FG-5963	Male	23	Progressive Disease	1	775	1	775	Glioblastoma,IDH WT	G4	WT	non-codel	HOMDEL (driver)	HOMDEL (driver)	homdel	AMP (driver)	AMP (driver)	no alteration	no alteration	No chr 19/20 gain	No combined CNA	WT	WT	Mutant	Unmethylated
TCGA-FG-5963-02A-12R-A29R-07	8.1892	3.19994	TCGA-FG-5963	Male	23	Progressive Disease	1	775	1	775	Glioblastoma,IDH WT	G4	WT	non-codel	HOMDEL (driver)	HOMDEL (driver)	homdel	AMP (driver)	AMP (driver)	no alteration	no alteration	No chr 19/20 gain	No combined CNA	WT	WT	Mutant	Unmethylated
TCGA-HT-7855-01A-11R-2403-07	5.7567	2.75632	TCGA-HT-7855	Male	39	Complete Remission/Response	0	585	0	585	Astroctyoma, IDH mut	G2&G3	Mutant	non-codel	no alteration	no alteration	non-homdel	no alteration	no alteration	no alteration	no alteration	No chr 19/20 gain	No combined CNA	WT	WT	Mutant	Methylated
TCGA-TM-A84G-01A-11R-A36H-07	2.1037	1.63399	TCGA-TM-A84G	Female	54	Complete Remission/Response	0	1236	0	1236	Oligodendroglioma, IDH mut, 1p/19q-codel	G2&G3	Mutant	codel	no alteration	no alteration	non-homdel	no alteration	no alteration	no alteration	no alteration	No chr 19/20 gain	No combined CNA	WT	WT	WT	Methylated
TCGA-QH-A6XC-01A-12R-A32Q-07	82.4829	6.38341	TCGA-QH-A6XC	Male	48	Complete Remission/Response	0	508	0	508	Glioblastoma,IDH WT	G4	WT	non-codel	HOMDEL (driver)	HOMDEL (driver)	homdel	no alteration	G598V (driver), AMP (driver)	no alteration	no alteration	Gain chr 19/20	Gain chr 7 & loss chr 10	WT	WT	WT	Methylated
TCGA-FG-5965-02A-11R-A29R-07	111.971	6.81981	TCGA-FG-5965	Female	39	Stable Disease	1	1120	1	1120	Astroctyoma, IDH mut	G4	Mutant	non-codel	HOMDEL (driver)	HOMDEL (driver)	homdel	no alteration	no alteration	no alteration	no alteration	No chr 19/20 gain	No combined CNA	WT	WT	Mutant	Methylated
TCGA-HT-7686-01A-11R-2256-07	27.9682	4.8564	TCGA-HT-7686	Female	29	Complete Remission/Response	0	1300	0	1300	Astroctyoma, IDH mut	G2&G3	Mutant	non-codel	no alteration	no alteration	non-homdel	no alteration	no alteration	no alteration	no alteration	No chr 19/20 gain	No combined CNA	WT	WT	Mutant	Methylated
TCGA-S9-A6WE-01A-12R-A33Z-07	10.3401	3.50336	TCGA-S9-A6WE	Male	34	Partial Remission/Response	0	4113	0	4113	Oligodendroglioma, IDH mut, 1p/19q-codel	G2&G3	Mutant	codel	no alteration	no alteration	non-homdel	no alteration	no alteration	no alteration	no alteration	No chr 19/20 gain	No combined CNA	WT	WT	WT	Methylated
TCGA-06-0171-02A-11R-2005-01	58.9983	5.90685	TCGA-06-0171	Male	65	[Not Available]	1	399	1	399	Glioblastoma,IDH WT	G4	WT	non-codel	HOMDEL (driver)	HOMDEL (driver)	homdel	no alteration	no alteration	no alteration	no alteration	No chr 19/20 gain	Gain chr 7 & loss chr 10	NA	WT	WT	NA
TCGA-32-2634-01A-01R-1850-01	45.7881	5.54807	TCGA-32-2634	Male	82	[Not Available]	0	693	0	693	Glioblastoma,IDH WT	G4	WT	non-codel	no alteration	no alteration	non-homdel	no alteration	no alteration	no alteration	no alteration	No chr 19/20 gain	No combined CNA	WT	WT	WT	Methylated
TCGA-12-3652-01A-01R-1849-01	28.9237	4.90322	TCGA-12-3652	Male	60	[Not Available]	1	1062	1	1062	Glioblastoma,IDH WT	G4	WT	non-codel	HOMDEL (driver)	HOMDEL (driver)	homdel	no alteration	R252P (driver), AMP (driver)	no alteration	no alteration	Gain chr 19/20	No combined CNA	WT	WT	WT	Unmethylated
TCGA-32-2638-01A-01R-1850-01	13.2132	3.82916	TCGA-32-2638	Male	67	[Not Available]	1	766	1	766	Glioblastoma,IDH WT	G4	WT	non-codel	no alteration	W110* (driver)	non-homdel	no alteration	AMP (driver)	no alteration	no alteration	Gain chr 19/20	Gain chr 7 & loss chr 10	WT	WT	WT	Methylated
TCGA-06-0882-01A-01R-1849-01	64.34	6.02989	TCGA-06-0882	Male	30	[Not Available]	1	632	1	632	Glioblastoma,IDH WT	G4	WT	non-codel	HOMDEL (driver)	HOMDEL (driver)	homdel	no alteration	no alteration	no alteration	no alteration	No chr 19/20 gain	Gain chr 7 & loss chr 10	WT	WT	WT	Unmethylated
TCGA-06-0168-01A-01R-1849-01	44.915	5.52089	TCGA-06-0168	Female	59	[Not Available]	1	598	1	598	Glioblastoma,IDH WT	G4	WT	non-codel	no alteration	no alteration	non-homdel	no alteration	no alteration	no alteration	no alteration	No chr 19/20 gain	Gain chr 7 & loss chr 10	WT	WT	WT	NA
TCGA-12-1597-01B-01R-1849-01	69.0401	6.13011	TCGA-12-1597	Female	62	[Not Available]	1	675	1	675	Glioblastoma,IDH WT	G4	WT	NA	no alteration	no alteration	non-homdel	no alteration	no alteration	no alteration	no alteration	NA	NA	WT	WT	WT	Unmethylated
TCGA-28-2513-01A-01R-1850-01	54.5616	5.79602	TCGA-28-2513	Female	69	[Not Available]	0	222	0	222	Glioblastoma,IDH WT	G4	WT	non-codel	HOMDEL (driver)	HOMDEL (driver)	homdel	no alteration	AMP (driver)	no alteration	no alteration	No chr 19/20 gain	Gain chr 7 & loss chr 10	WT	WT	WT	Unmethylated
TCGA-32-2616-01A-01R-1850-01	11.4558	3.63875	TCGA-32-2616	Female	48	[Not Available]	1	224	1	224	NA	G4	NA	non-codel	no alteration	no alteration	non-homdel	no alteration	no alteration	no alteration	no alteration	No chr 19/20 gain	No combined CNA	WT	NA	NA	Methylated
TCGA-41-2572-01A-01R-1850-01	46.0879	5.55728	TCGA-41-2572	Male	67	[Not Available]	1	406	1	406	Glioblastoma,IDH WT	G4	WT	non-codel	no alteration	no alteration	non-homdel	no alteration	AMP (driver)	no alteration	no alteration	Gain chr 19/20	Gain chr 7 & loss chr 10	WT	WT	WT	Unmethylated
TCGA-06-0750-01A-01R-1849-01	3.5411	2.18304	TCGA-06-0750	Male	43	[Not Available]	1	28	1	28	Glioblastoma,IDH WT	G4	WT	non-codel	HOMDEL (driver)	HOMDEL (driver)	homdel	no alteration	P596R (driver), AMP (driver)	no alteration	no alteration	No chr 19/20 gain	Gain chr 7 & loss chr 10	WT	WT	WT	NA
TCGA-27-2521-01A-01R-1850-01	28.0616	4.86104	TCGA-27-2521	Male	34	[Not Available]	1	510	1	510	Astroctyoma, IDH mut	G4	Mutant	non-codel	HOMDEL (driver)	HOMDEL (driver)	homdel	no alteration	no alteration	no alteration	no alteration	No chr 19/20 gain	No combined CNA	WT	WT	Mutant	Methylated
TCGA-06-5859-01A-01R-1849-01	69.3258	6.13598	TCGA-06-5859	Male	63	[Not Available]	0	139	0	139	Glioblastoma,IDH WT	G4	WT	non-codel	HOMDEL (driver)	HOMDEL (driver)	homdel	no alteration	no alteration	no alteration	no alteration	No chr 19/20 gain	Gain chr 7 & loss chr 10	WT	WT	WT	Unmethylated
TCGA-28-5208-01A-01R-1850-01	77.1098	6.28743	TCGA-28-5208	Male	52	Progressive Disease	1	544	1	544	Glioblastoma,IDH WT	G4	WT	non-codel	HOMDEL (driver)	HOMDEL (driver)	homdel	no alteration	no alteration	no alteration	no alteration	No chr 19/20 gain	No combined CNA	WT	WT	WT	Methylated
TCGA-16-0846-01A-01R-1850-01	63.8319	6.01863	TCGA-16-0846	Male	85	[Not Available]	1	119	1	119	Glioblastoma,IDH WT	G4	WT	non-codel	no alteration	no alteration	non-homdel	no alteration	no alteration	no alteration	no alteration	No chr 19/20 gain	Gain chr 7 & loss chr 10	WT	WT	WT	Methylated
TCGA-06-2567-01A-01R-1849-01	89.0711	6.49299	TCGA-06-2567	Male	65	[Not Available]	1	133	1	133	Glioblastoma,IDH WT	G4	WT	non-codel	no alteration	no alteration	non-homdel	no alteration	no alteration	no alteration	no alteration	No chr 19/20 gain	Gain chr 7 & loss chr 10	WT	WT	WT	Methylated
TCGA-06-0178-01A-01R-1849-01	11.2086	3.60983	TCGA-06-0178	Male	38	[Not Available]	1	2681	1	2681	Astroctyoma, IDH mut	G4	Mutant	non-codel	no alteration	no alteration	non-homdel	no alteration	no alteration	no alteration	no alteration	No chr 19/20 gain	No combined CNA	WT	WT	WT	NA
TCGA-06-0744-01A-01R-1849-01	9.6165	3.40824	TCGA-06-0744	Male	66	[Not Available]	1	1426	1	1426	Glioblastoma,IDH WT	G4	WT	non-codel	no alteration	no alteration	non-homdel	no alteration	AMP (driver)	no alteration	no alteration	No chr 19/20 gain	Gain chr 7 & loss chr 10	WT	WT	WT	NA
TCGA-06-0211-02A-02R-2005-01	11.4746	3.64092	TCGA-06-0211	Male	47	[Not Available]	1	360	1	360	Glioblastoma,IDH WT	G4	WT	non-codel	HOMDEL (driver)	HOMDEL (driver)	homdel	no alteration	AMP (driver)	no alteration	no alteration	Gain chr 19/20	Gain chr 7 & loss chr 10	WT	WT	WT	NA
TCGA-14-0817-01A-01R-1849-01	28.2727	4.87148	TCGA-14-0817	Female	69	[Not Available]	1	164	NA	164	Glioblastoma,IDH WT	G4	WT	non-codel	HOMDEL (driver)	HOMDEL (driver)	homdel	no alteration	AMP (driver)	no alteration	no alteration	No chr 19/20 gain	Gain chr 7 & loss chr 10	WT	WT	WT	Unmethylated
TCGA-12-3650-01A-01R-1849-01	23.1198	4.59215	TCGA-12-3650	Male	46	[Not Available]	1	333	1	333	Glioblastoma,IDH WT	G4	WT	non-codel	HOMDEL (driver)	HOMDEL (driver)	homdel	no alteration	A289V (driver), AMP (driver)	no alteration	no alteration	No chr 19/20 gain	Gain chr 7 & loss chr 10	WT	WT	WT	Unmethylated
TCGA-06-0139-01A-01R-1849-01	21.0915	4.46542	TCGA-06-0139	Male	40	[Not Available]	1	362	1	362	Glioblastoma,IDH WT	G4	WT	non-codel	no alteration	no alteration	non-homdel	no alteration	no alteration	no alteration	no alteration	No chr 19/20 gain	No combined CNA	NA	WT	WT	Unmethylated
TCGA-06-0644-01A-02R-1849-01	72.6394	6.20241	TCGA-06-0644	Male	71	[Not Available]	1	384	1	384	Glioblastoma,IDH WT	G4	WT	non-codel	HOMDEL (driver)	HOMDEL (driver)	homdel	no alteration	no alteration	no alteration	no alteration	No chr 19/20 gain	Gain chr 7 & loss chr 10	WT	Mutant	WT	NA
TCGA-06-2569-01A-01R-1849-01	1.5343	1.34159	TCGA-06-2569	Female	24	[Not Available]	0	13	0	13	Glioblastoma,IDH WT	G4	WT	non-codel	no alteration	no alteration	non-homdel	no alteration	no alteration	no alteration	no alteration	No chr 19/20 gain	No combined CNA	WT	WT	WT	Unmethylated
TCGA-27-1830-01A-01R-1850-01	35.7813	5.2009	TCGA-27-1830	Male	57	[Not Available]	1	154	1	154	Glioblastoma,IDH WT	G4	WT	non-codel	HOMDEL (driver)	HOMDEL (driver)	homdel	no alteration	no alteration	no alteration	no alteration	No chr 19/20 gain	Gain chr 7 & loss chr 10	WT	WT	WT	Unmethylated
TCGA-32-1970-01A-01R-1850-01	91.4926	6.53127	TCGA-32-1970	Male	59	[Not Available]	1	468	1	468	Glioblastoma,IDH WT	G4	WT	non-codel	no alteration	no alteration	non-homdel	no alteration	A289V (driver)	no alteration	no alteration	No chr 19/20 gain	Gain chr 7 & loss chr 10	WT	WT	WT	Unmethylated
TCGA-27-2523-01A-01R-1850-01	17.7062	4.22544	TCGA-27-2523	Male	63	[Not Available]	1	489	1	489	Glioblastoma,IDH WT	G4	WT	non-codel	HOMDEL (driver)	HOMDEL (driver)	homdel	no alteration	AMP (driver)	no alteration	no alteration	No chr 19/20 gain	Gain chr 7 & loss chr 10	WT	WT	WT	Methylated
TCGA-14-0871-01A-01R-1849-01	3.6898	2.22953	TCGA-14-0871	Female	74	[Not Available]	1	880	NA	880	Glioblastoma,IDH WT	G4	WT	non-codel	no alteration	no alteration	non-homdel	no alteration	no alteration	no alteration	no alteration	No chr 19/20 gain	Gain chr 7 & loss chr 10	WT	WT	WT	Unmethylated
TCGA-28-5213-01A-01R-1850-01	25.3515	4.71981	TCGA-28-5213	Male	72	[Not Applicable]	0	951	0	951	Glioblastoma,IDH WT	G4	WT	non-codel	no alteration	no alteration	non-homdel	no alteration	G598V (driver)	no alteration	no alteration	No chr 19/20 gain	Gain chr 7 & loss chr 10	WT	WT	WT	Unmethylated
TCGA-06-0190-02A-01R-2005-01	12.9699	3.80425	TCGA-06-0190	Male	62	[Not Available]	1	317	1	317	Glioblastoma,IDH WT	G4	WT	non-codel	HOMDEL (driver)	HOMDEL (driver)	homdel	no alteration	no alteration	no alteration	no alteration	No chr 19/20 gain	Gain chr 7 & loss chr 10	WT	WT	WT	NA
TCGA-27-1834-01A-01R-1850-01	55.8526	5.82915	TCGA-27-1834	Male	56	[Not Available]	1	1233	1	1233	Glioblastoma,IDH WT	G4	WT	non-codel	HOMDEL (driver)	HOMDEL (driver)	homdel	no alteration	no alteration	no alteration	no alteration	No chr 19/20 gain	Gain chr 7 & loss chr 10	WT	WT	WT	Methylated
TCGA-06-5417-01A-01R-1849-01	11.6354	3.6594	TCGA-06-5417	Female	45	[Not Available]	0	155	0	155	Astroctyoma, IDH mut	G4	Mutant	NA	no alteration	no alteration	non-homdel	no alteration	no alteration	no alteration	no alteration	NA	NA	WT	WT	Mutant	Methylated
TCGA-76-4931-01A-01R-1850-01	31.0195	5.00088	TCGA-76-4931	Female	70	[Not Available]	1	279	1	279	Glioblastoma,IDH WT	G4	WT	non-codel	HOMDEL (driver)	HOMDEL (driver)	homdel	no alteration	G598V (driver), AMP (driver)	no alteration	no alteration	No chr 19/20 gain	Gain chr 7 & loss chr 10	WT	WT	WT	Unmethylated
TCGA-02-2486-01A-01R-1849-01	41.5187	5.41003	TCGA-02-2486	Male	64	[Not Available]	1	618	1	618	Glioblastoma,IDH WT	G4	WT	non-codel	HOMDEL (driver)	HOMDEL (driver)	homdel	no alteration	no alteration	no alteration	no alteration	No chr 19/20 gain	Gain chr 7 & loss chr 10	WT	WT	WT	Unmethylated
TCGA-06-0130-01A-01R-1849-01	7.7735	3.13315	TCGA-06-0130	Male	54	[Not Available]	1	394	1	394	Glioblastoma,IDH WT	G4	WT	non-codel	no alteration	no alteration	non-homdel	no alteration	no alteration	no alteration	no alteration	No chr 19/20 gain	No combined CNA	WT	WT	WT	Unmethylated
TCGA-14-0789-01A-01R-1849-01	75.1347	6.25048	TCGA-14-0789	Male	54	[Not Available]	1	342	NA	342	Glioblastoma,IDH WT	G4	WT	non-codel	no alteration	HOMDEL (driver)	homdel	no alteration	AMP (driver)	no alteration	no alteration	No chr 19/20 gain	Gain chr 7 & loss chr 10	WT	WT	WT	Methylated
TCGA-14-0790-01B-01R-1849-01	60.6354	5.94569	TCGA-14-0790	Female	64	[Not Available]	1	419	1	419	Glioblastoma,IDH WT	G4	WT	non-codel	HOMDEL (driver)	HOMDEL (driver)	homdel	no alteration	A289V (driver), AMP (driver)	no alteration	no alteration	No chr 19/20 gain	Gain chr 7 & loss chr 10	WT	WT	WT	Methylated
TCGA-06-0125-02A-11R-2005-01	189.426	7.57308	TCGA-06-0125	Female	63	[Not Available]	1	1448	1	1448	Glioblastoma,IDH WT	G4	WT	non-codel	HOMDEL (driver)	HOMDEL (driver)	homdel	no alteration	G598V (driver), AMP (driver)	no alteration	no alteration	Gain chr 19/20	No combined CNA	WT	WT	WT	Methylated
TCGA-28-5220-01A-01R-1850-01	5.8154	2.7688	TCGA-28-5220	Male	67	[Not Applicable]	1	388	1	388	Glioblastoma,IDH WT	G4	WT	non-codel	HOMDEL (driver)	HOMDEL (driver)	homdel	no alteration	no alteration	no alteration	no alteration	No chr 19/20 gain	Gain chr 7 & loss chr 10	WT	WT	WT	Unmethylated
TCGA-27-1835-01A-01R-1850-01	56.929	5.85621	TCGA-27-1835	Female	53	[Not Available]	1	648	1	648	Glioblastoma,IDH WT	G4	WT	non-codel	no alteration	no alteration	non-homdel	no alteration	no alteration	no alteration	no alteration	No chr 19/20 gain	Gain chr 7 & loss chr 10	WT	WT	WT	Methylated
TCGA-27-2524-01A-01R-1850-01	23.4116	4.60949	TCGA-27-2524	Male	56	[Not Available]	1	231	1	231	Glioblastoma,IDH WT	G4	WT	non-codel	HOMDEL (driver)	HOMDEL (driver)	homdel	no alteration	no alteration	no alteration	no alteration	No chr 19/20 gain	Gain chr 7 & loss chr 10	WT	WT	WT	Unmethylated
TCGA-14-2554-01A-01R-1850-01	39.9204	5.35475	TCGA-14-2554	Female	52	[Not Available]	1	532	1	532	Glioblastoma,IDH WT	G4	WT	non-codel	HOMDEL (driver)	HOMDEL (driver)	homdel	no alteration	G598V (driver), AMP (driver)	no alteration	no alteration	Gain chr 19/20	Gain chr 7 & loss chr 10	WT	WT	WT	Unmethylated
TCGA-06-5408-01A-01R-1849-01	25.0452	4.70295	TCGA-06-5408	Female	54	[Not Available]	1	357	1	357	Glioblastoma,IDH WT	G4	WT	non-codel	HOMDEL (driver)	HOMDEL (driver)	homdel	no alteration	AMP (driver)	no alteration	no alteration	No chr 19/20 gain	Gain chr 7 & loss chr 10	WT	WT	WT	Unmethylated
TCGA-06-2570-01A-01R-1849-01	17.6109	4.21808	TCGA-06-2570	Female	21	[Not Available]	0	958	0	958	Astroctyoma, IDH mut	G4	Mutant	non-codel	no alteration	no alteration	non-homdel	no alteration	no alteration	no alteration	no alteration	No chr 19/20 gain	No combined CNA	WT	WT	Mutant	Methylated
TCGA-28-1753-01A-01R-1850-01	17.3033	4.19403	TCGA-28-1753	Male	53	[Not Available]	0	37	0	37	Glioblastoma,IDH WT	G4	WT	non-codel	HOMDEL (driver)	HOMDEL (driver)	homdel	no alteration	AMP (driver)	no alteration	no alteration	No chr 19/20 gain	Gain chr 7 & loss chr 10	WT	WT	WT	Unmethylated
TCGA-27-1837-01A-01R-1850-01	27.6538	4.84065	TCGA-27-1837	Male	36	[Not Available]	1	427	1	427	Glioblastoma,IDH WT	G4	WT	non-codel	HOMDEL (driver)	HOMDEL (driver)	homdel	no alteration	AMP (driver)	no alteration	no alteration	No chr 19/20 gain	No combined CNA	WT	WT	WT	Methylated
TCGA-41-5651-01A-01R-1850-01	44.9474	5.52191	TCGA-41-5651	Female	59	[Not Available]	1	460	1	460	Glioblastoma,IDH WT	G4	WT	non-codel	no alteration	no alteration	non-homdel	no alteration	no alteration	no alteration	no alteration	Gain chr 19/20	Gain chr 7 & loss chr 10	WT	WT	WT	Methylated
TCGA-28-5216-01A-01R-1850-01	8.772	3.28865	TCGA-28-5216	Male	52	[Not Available]	0	415	0	415	Glioblastoma,IDH WT	G4	WT	non-codel	HOMDEL (driver)	HOMDEL (driver)	homdel	no alteration	no alteration	no alteration	no alteration	No chr 19/20 gain	No combined CNA	WT	WT	WT	Unmethylated
TCGA-06-2565-01A-01R-1849-01	11.3216	3.62312	TCGA-06-2565	Male	59	[Not Available]	1	506	1	506	Glioblastoma,IDH WT	G4	WT	non-codel	HOMDEL (driver)	HOMDEL (driver)	homdel	no alteration	R108K (driver), AMP (driver)	no alteration	no alteration	Gain chr 19/20	No combined CNA	WT	WT	WT	Methylated
TCGA-12-5295-01A-01R-1849-01	38.7751	5.31379	TCGA-12-5295	Female	60	[Not Available]	1	454	1	454	Glioblastoma,IDH WT	G4	WT	non-codel	HOMDEL (driver)	HOMDEL (driver)	homdel	no alteration	AMP (driver)	no alteration	no alteration	No chr 19/20 gain	Gain chr 7 & loss chr 10	WT	WT	WT	Methylated
TCGA-16-1045-01B-01R-1850-01	35.3544	5.18406	TCGA-16-1045	Female	49	[Not Available]	1	883	1	883	Glioblastoma,IDH WT	G4	WT	non-codel	HOMDEL (driver)	HOMDEL (driver)	homdel	no alteration	T263P (driver), AMP (driver)	no alteration	no alteration	No chr 19/20 gain	Gain chr 7 & loss chr 10	WT	WT	WT	Methylated
TCGA-14-0736-02A-01R-2005-01	37.7616	5.27656	TCGA-14-0736	Male	49	[Not Available]	1	460	1	460	NA	G4	NA	non-codel	HOMDEL (driver)	HOMDEL (driver)	homdel	no alteration	no alteration	no alteration	no alteration	No chr 19/20 gain	Gain chr 7 & loss chr 10	NA	NA	NA	Unmethylated
TCGA-06-2559-01A-01R-1849-01	34.429	5.14686	TCGA-06-2559	Male	83	[Not Available]	1	150	1	150	Glioblastoma,IDH WT	G4	WT	non-codel	no alteration	no alteration	non-homdel	no alteration	no alteration	no alteration	no alteration	No chr 19/20 gain	No combined CNA	WT	WT	WT	Methylated
TCGA-06-2558-01A-01R-1849-01	25.0184	4.70146	TCGA-06-2558	Female	75	[Not Available]	1	380	NA	380	Glioblastoma,IDH WT	G4	WT	non-codel	no alteration	no alteration	non-homdel	no alteration	AMP (driver)	no alteration	no alteration	No chr 19/20 gain	Gain chr 7 & loss chr 10	WT	WT	WT	Unmethylated
TCGA-28-5218-01A-01R-1850-01	1.7525	1.46074	TCGA-28-5218	Male	63	[Not Available]	1	157	NA	157	Glioblastoma,IDH WT	G4	WT	non-codel	A120D, W112L	HOMDEL (driver)	homdel	no alteration	no alteration	no alteration	no alteration	Gain chr 19/20	No combined CNA	WT	WT	WT	Unmethylated
TCGA-26-5139-01A-01R-1850-01	63.6373	6.0143	TCGA-26-5139	Female	65	[Not Available]	0	48	0	48	Glioblastoma,IDH WT	G4	WT	non-codel	HOMDEL (driver)	HOMDEL (driver)	homdel	no alteration	C628F, AMP (driver)	no alteration	no alteration	No chr 19/20 gain	Gain chr 7 & loss chr 10	WT	WT	WT	Unmethylated
TCGA-02-0055-01A-01R-1849-01	5.2544	2.64487	TCGA-02-0055	Female	62	[Not Available]	1	76	1	76	Glioblastoma,IDH WT	G4	WT	non-codel	no alteration	no alteration	non-homdel	no alteration	no alteration	no alteration	no alteration	No chr 19/20 gain	No combined CNA	WT	WT	WT	Unmethylated
TCGA-28-2499-01A-01R-1850-01	44.662	5.51292	TCGA-28-2499	Male	59	[Not Available]	0	95	NA	95	Glioblastoma,IDH WT	G4	WT	NA	no alteration	no alteration	non-homdel	no alteration	no alteration	no alteration	no alteration	NA	NA	WT	WT	WT	Unmethylated
TCGA-76-4928-01B-01R-1850-01	108.865	6.77958	TCGA-76-4928	Female	85	[Not Available]	1	94	1	94	Glioblastoma,IDH WT	G4	WT	non-codel	HOMDEL (driver)	HOMDEL (driver)	homdel	no alteration	no alteration	no alteration	no alteration	No chr 19/20 gain	Gain chr 7 & loss chr 10	WT	Mutant	WT	Methylated
TCGA-19-2629-01A-01R-1850-01	55.4574	5.81909	TCGA-19-2629	Male	60	[Not Available]	1	737	1	737	Astroctyoma, IDH mut	G4	Mutant	non-codel	no alteration	no alteration	non-homdel	no alteration	no alteration	no alteration	no alteration	No chr 19/20 gain	No combined CNA	WT	WT	Mutant	Unmethylated
TCGA-06-0743-01A-01R-1849-01	25.6401	4.73553	TCGA-06-0743	Male	69	[Not Available]	1	803	1	803	Glioblastoma,IDH WT	G4	WT	non-codel	HOMDEL (driver)	HOMDEL (driver)	homdel	no alteration	A289V (driver), AMP (driver)	no alteration	no alteration	Gain chr 19/20	Gain chr 7 & loss chr 10	WT	WT	WT	NA
TCGA-06-2562-01A-01R-1849-01	21.6088	4.49881	TCGA-06-2562	Male	81	[Not Available]	1	382	1	382	Glioblastoma,IDH WT	G4	WT	non-codel	no alteration	HOMDEL (driver)	homdel	no alteration	no alteration	no alteration	no alteration	No chr 19/20 gain	Gain chr 7 & loss chr 10	WT	WT	WT	Unmethylated
TCGA-06-5412-01A-01R-1849-01	86.8253	6.45656	TCGA-06-5412	Female	78	[Not Available]	1	138	1	138	Glioblastoma,IDH WT	G4	WT	non-codel	no alteration	no alteration	non-homdel	no alteration	no alteration	no alteration	no alteration	No chr 19/20 gain	No combined CNA	WT	WT	WT	Methylated
TCGA-06-0157-01A-01R-1849-01	31.5132	5.02295	TCGA-06-0157	Female	63	[Not Available]	1	97	1	97	Glioblastoma,IDH WT	G4	WT	non-codel	no alteration	no alteration	non-homdel	no alteration	A289V (driver), AMP (driver)	no alteration	no alteration	Gain chr 19/20	Gain chr 7 & loss chr 10	WT	WT	WT	NA
TCGA-12-0616-01A-01R-1849-01	11.7579	3.67332	TCGA-12-0616	Female	36	[Not Available]	1	448	1	448	Glioblastoma,IDH WT	G4	WT	non-codel	no alteration	no alteration	non-homdel	no alteration	G598V (driver), AMP (driver)	no alteration	no alteration	No chr 19/20 gain	No combined CNA	WT	WT	WT	NA
TCGA-06-0646-01A-01R-1849-01	26.0893	4.75965	TCGA-06-0646	Male	60	[Not Available]	1	175	1	175	Glioblastoma,IDH WT	G4	WT	non-codel	HOMDEL (driver)	HOMDEL (driver)	homdel	no alteration	AMP (driver)	no alteration	no alteration	No chr 19/20 gain	Gain chr 7 & loss chr 10	WT	WT	WT	NA
TCGA-12-0821-01A-01R-1849-01	62.986	5.99968	TCGA-12-0821	Male	62	[Not Available]	1	323	1	323	Glioblastoma,IDH WT	G4	WT	non-codel	HOMDEL (driver)	HOMDEL (driver)	homdel	no alteration	AMP (driver)	no alteration	no alteration	No chr 19/20 gain	Gain chr 7 & loss chr 10	WT	WT	WT	Unmethylated
TCGA-06-0174-01A-01R-1849-01	17.5726	4.2151	TCGA-06-0174	Male	54	[Not Available]	1	98	1	98	Glioblastoma,IDH WT	G4	WT	non-codel	no alteration	no alteration	non-homdel	no alteration	AMP (driver)	no alteration	no alteration	No chr 19/20 gain	Gain chr 7 & loss chr 10	WT	WT	WT	NA
TCGA-15-0742-01A-01R-1850-01	20.6631	4.43717	TCGA-15-0742	Male	65	[Not Available]	1	419	NA	419	Glioblastoma,IDH WT	G4	WT	non-codel	HOMDEL (driver)	HOMDEL (driver)	homdel	no alteration	C636Y, AMP (driver)	no alteration	no alteration	No chr 19/20 gain	Gain chr 7 & loss chr 10	WT	WT	WT	NA
TCGA-19-2619-01A-01R-1850-01	51.5108	5.71454	TCGA-19-2619	Female	55	[Not Available]	0	294	0	294	Glioblastoma,IDH WT	G4	WT	non-codel	HOMDEL (driver)	HOMDEL (driver)	homdel	no alteration	AMP (driver)	no alteration	no alteration	No chr 19/20 gain	Gain chr 7 & loss chr 10	WT	WT	WT	Methylated
TCGA-27-1831-01A-01R-1850-01	24.3708	4.6651	TCGA-27-1831	Male	66	[Not Available]	1	505	1	505	Glioblastoma,IDH WT	G4	WT	non-codel	no alteration	no alteration	non-homdel	no alteration	R108K (driver), AMP (driver)	no alteration	no alteration	No chr 19/20 gain	Gain chr 7 & loss chr 10	WT	WT	WT	Unmethylated
TCGA-12-0618-01A-01R-1849-01	48.407	5.62664	TCGA-12-0618	Male	49	[Not Available]	1	395	NA	395	Glioblastoma,IDH WT	G4	WT	non-codel	no alteration	no alteration	non-homdel	no alteration	no alteration	no alteration	no alteration	No chr 19/20 gain	Gain chr 7 & loss chr 10	WT	WT	WT	NA
TCGA-32-4213-01A-01R-1850-01	11.4334	3.63615	TCGA-32-4213	Female	47	[Not Available]	0	604	0	604	Glioblastoma,IDH WT	G4	WT	non-codel	HOMDEL (driver)	HOMDEL (driver)	homdel	no alteration	AMP (driver)	no alteration	no alteration	No chr 19/20 gain	No combined CNA	WT	WT	WT	Methylated
TCGA-32-2615-01A-01R-1850-01	38.4227	5.30095	TCGA-32-2615	Male	62	[Not Available]	1	485	1	485	Glioblastoma,IDH WT	G4	WT	non-codel	HOMDEL (driver)	HOMDEL (driver)	homdel	no alteration	AMP (driver)	no alteration	no alteration	No chr 19/20 gain	No combined CNA	WT	WT	WT	Unmethylated
TCGA-28-2514-01A-02R-1850-01	48.129	5.6185	TCGA-28-2514	Male	45	[Not Available]	0	160	0	160	Glioblastoma,IDH WT	G4	WT	non-codel	no alteration	no alteration	non-homdel	no alteration	AMP (driver)	no alteration	no alteration	No chr 19/20 gain	No combined CNA	WT	WT	WT	Unmethylated
TCGA-02-0047-01A-01R-1849-01	15.4058	4.03613	TCGA-02-0047	Male	78	[Not Available]	1	448	1	448	Glioblastoma,IDH WT	G4	WT	non-codel	HOMDEL (driver)	HOMDEL (driver)	homdel	no alteration	no alteration	no alteration	no alteration	No chr 19/20 gain	No combined CNA	WT	WT	WT	Unmethylated
TCGA-27-2519-01A-01R-1850-01	18.3201	4.27203	TCGA-27-2519	Male	48	[Not Available]	1	550	1	550	Glioblastoma,IDH WT	G4	WT	non-codel	no alteration	no alteration	non-homdel	no alteration	no alteration	no alteration	no alteration	No chr 19/20 gain	Gain chr 7 & loss chr 10	WT	WT	WT	Unmethylated
TCGA-06-0747-01A-01R-1849-01	107.078	6.75593	TCGA-06-0747	Male	53	[Not Available]	1	82	1	82	Glioblastoma,IDH WT	G4	WT	non-codel	HOMDEL (driver)	HOMDEL (driver)	homdel	no alteration	A289V (driver), AMP (driver)	no alteration	no alteration	No chr 19/20 gain	No combined CNA	WT	WT	WT	NA
TCGA-06-5411-01A-01R-1849-01	44.0747	5.49425	TCGA-06-5411	Male	51	[Not Available]	1	254	1	254	Glioblastoma,IDH WT	G4	WT	non-codel	HOMDEL (driver)	HOMDEL (driver)	homdel	no alteration	no alteration	no alteration	no alteration	No chr 19/20 gain	Gain chr 7 & loss chr 10	WT	WT	WT	Unmethylated
TCGA-28-2510-01A-01R-1850-01	84.2417	6.41349	TCGA-28-2510	NA	NA	NA	NA	NA	NA	NA	Glioblastoma,IDH WT	G4	WT	non-codel	HOMDEL (driver)	HOMDEL (driver)	homdel	no alteration	no alteration	no alteration	no alteration	No chr 19/20 gain	No combined CNA	WT	WT	WT	Unmethylated
TCGA-41-2571-01A-01R-1850-01	54.2471	5.78783	TCGA-41-2571	Male	89	[Not Available]	1	26	1	26	Glioblastoma,IDH WT	G4	WT	non-codel	no alteration	no alteration	non-homdel	no alteration	no alteration	no alteration	no alteration	No chr 19/20 gain	Gain chr 7 & loss chr 10	WT	WT	WT	Unmethylated
TCGA-06-0190-01A-01R-1849-01	67.2889	6.09358	TCGA-06-0190	Male	62	[Not Available]	1	317	1	317	Glioblastoma,IDH WT	G4	WT	non-codel	HOMDEL (driver)	HOMDEL (driver)	homdel	no alteration	no alteration	no alteration	no alteration	No chr 19/20 gain	Gain chr 7 & loss chr 10	WT	WT	WT	NA
TCGA-06-5414-01A-01R-1849-01	76.9074	6.28369	TCGA-06-5414	Male	61	[Not Available]	0	273	0	273	Glioblastoma,IDH WT	G4	WT	non-codel	HOMDEL (driver)	HOMDEL (driver)	homdel	no alteration	AMP (driver)	no alteration	no alteration	Gain chr 19/20	Gain chr 7 & loss chr 10	WT	WT	WT	Unmethylated
TCGA-06-0645-01A-01R-1849-01	20.1316	4.40133	TCGA-06-0645	Female	55	[Not Available]	1	175	1	175	Glioblastoma,IDH WT	G4	WT	non-codel	no alteration	no alteration	non-homdel	no alteration	AMP (driver)	no alteration	no alteration	Gain chr 19/20	Gain chr 7 & loss chr 10	WT	WT	WT	NA
TCGA-06-5410-01A-01R-1849-01	65.7307	6.06028	TCGA-06-5410	Female	72	[Not Available]	1	108	1	108	Glioblastoma,IDH WT	G4	WT	non-codel	no alteration	no alteration	non-homdel	no alteration	no alteration	no alteration	no alteration	No chr 19/20 gain	No combined CNA	WT	WT	WT	Methylated
TCGA-06-5413-01A-01R-1849-01	5.6134	2.72539	TCGA-06-5413	Male	67	[Not Available]	0	268	0	268	Glioblastoma,IDH WT	G4	WT	non-codel	HOMDEL (driver)	HOMDEL (driver)	homdel	no alteration	AMP (driver)	no alteration	no alteration	No chr 19/20 gain	Gain chr 7 & loss chr 10	WT	WT	WT	Unmethylated
TCGA-06-0125-01A-01R-1849-01	61.2578	5.96018	TCGA-06-0125	Female	63	[Not Available]	1	1448	1	1448	Glioblastoma,IDH WT	G4	WT	non-codel	HOMDEL (driver)	HOMDEL (driver)	homdel	no alteration	G598V (driver), AMP (driver)	no alteration	no alteration	Gain chr 19/20	No combined CNA	WT	WT	WT	Methylated
TCGA-06-2564-01A-01R-1849-01	51.8349	5.72342	TCGA-06-2564	Male	50	[Not Available]	0	181	0	181	Glioblastoma,IDH WT	G4	WT	non-codel	no alteration	no alteration	non-homdel	no alteration	AMP (driver)	no alteration	no alteration	No chr 19/20 gain	Gain chr 7 & loss chr 10	WT	WT	WT	Unmethylated
TCGA-76-4926-01B-01R-1850-01	106.198	6.74414	TCGA-76-4926	Male	68	[Not Available]	1	138	1	138	Glioblastoma,IDH WT	G4	WT	non-codel	no alteration	no alteration	non-homdel	no alteration	AMP (driver)	no alteration	no alteration	No chr 19/20 gain	Gain chr 7 & loss chr 10	WT	WT	WT	Unmethylated
TCGA-06-1804-01A-01R-1849-01	76.2181	6.27087	TCGA-06-1804	Female	81	[Not Available]	1	414	1	414	Glioblastoma,IDH WT	G4	WT	non-codel	no alteration	no alteration	non-homdel	no alteration	D256Y (driver)	no alteration	no alteration	No chr 19/20 gain	Gain chr 7 & loss chr 10	WT	WT	WT	Methylated
TCGA-19-5960-01A-11R-1850-01	81.2728	6.36234	TCGA-19-5960	Male	56	Stable Disease	1	455	1	455	Glioblastoma,IDH WT	G4	WT	non-codel	no alteration	no alteration	non-homdel	no alteration	no alteration	no alteration	no alteration	No chr 19/20 gain	Gain chr 7 & loss chr 10	WT	WT	WT	Unmethylated
TCGA-06-0878-01A-01R-1849-01	41.4526	5.40778	TCGA-06-0878	Male	74	[Not Available]	0	218	0	218	Glioblastoma,IDH WT	G4	WT	non-codel	HOMDEL (driver)	HOMDEL (driver)	homdel	no alteration	AMP (driver)	no alteration	no alteration	No chr 19/20 gain	Gain chr 7 & loss chr 10	WT	WT	WT	Unmethylated
TCGA-06-0132-01A-02R-1849-01	71.0464	6.17085	TCGA-06-0132	Male	49	[Not Available]	1	771	1	771	Glioblastoma,IDH WT	G4	WT	non-codel	no alteration	no alteration	non-homdel	no alteration	AMP (driver)	no alteration	no alteration	No chr 19/20 gain	No combined CNA	WT	WT	WT	NA
TCGA-14-0781-01B-01R-1849-01	55.7366	5.82621	TCGA-14-0781	Male	49	[Not Available]	1	29	1	29	Glioblastoma,IDH WT	G4	WT	non-codel	no alteration	no alteration	non-homdel	no alteration	no alteration	no alteration	no alteration	No chr 19/20 gain	No combined CNA	WT	WT	WT	Unmethylated
TCGA-76-4927-01A-01R-1850-01	94.7374	6.58101	TCGA-76-4927	Male	58	[Not Available]	1	535	1	535	Glioblastoma,IDH WT	G4	WT	NA	no alteration	no alteration	non-homdel	no alteration	R222C (driver)	no alteration	no alteration	NA	NA	WT	WT	WT	Unmethylated
TCGA-14-0787-01A-01R-1849-01	15.4365	4.03883	TCGA-14-0787	Male	69	[Not Available]	1	68	NA	68	Glioblastoma,IDH WT	G4	WT	non-codel	HOMDEL (driver)	HOMDEL (driver)	homdel	no alteration	AMP (driver)	no alteration	no alteration	No chr 19/20 gain	Gain chr 7 & loss chr 10	WT	WT	WT	Methylated
TCGA-19-4065-02A-11R-2005-01	12.8571	3.79255	TCGA-19-4065	Male	36	[Not Available]	0	214	0	214	NA	G4	NA	non-codel	HOMDEL (driver)	HOMDEL (driver)	homdel	no alteration	no alteration	no alteration	no alteration	No chr 19/20 gain	Gain chr 7 & loss chr 10	WT	NA	NA	Unmethylated
TCGA-19-4065-01A-01R-2005-01	72.3265	6.19626	TCGA-19-4065	Male	36	[Not Available]	0	214	0	214	NA	G4	NA	non-codel	HOMDEL (driver)	HOMDEL (driver)	homdel	no alteration	no alteration	no alteration	no alteration	No chr 19/20 gain	Gain chr 7 & loss chr 10	WT	NA	NA	Unmethylated
TCGA-19-0957-02A-11R-2005-01	125.817	6.98661	TCGA-19-0957	Female	48	[Not Available]	1	666	1	666	Glioblastoma,IDH WT	G4	WT	non-codel	no alteration	no alteration	non-homdel	no alteration	no alteration	no alteration	no alteration	No chr 19/20 gain	Gain chr 7 & loss chr 10	NA	NA	NA	Unmethylated
TCGA-26-5133-01A-01R-1850-01	58.4267	5.89304	TCGA-26-5133	Male	59	[Not Available]	0	452	0	452	Glioblastoma,IDH WT	G4	WT	non-codel	no alteration	no alteration	non-homdel	no alteration	no alteration	no alteration	no alteration	No chr 19/20 gain	No combined CNA	WT	WT	WT	Unmethylated
TCGA-02-2483-01A-01R-1849-01	5.732	2.75104	TCGA-02-2483	Male	43	[Not Available]	0	466	0	466	Astroctyoma, IDH mut	G4	Mutant	non-codel	HOMDEL (driver)	HOMDEL (driver)	homdel	no alteration	no alteration	no alteration	no alteration	No chr 19/20 gain	No combined CNA	WT	WT	Mutant	Methylated
TCGA-06-0678-11A-32R-A36H-07	80.7558	6.35325	TCGA-06-0678	NA	NA	NA	NA	NA	NA	NA	NA	NA	NA	NA	NA	NA	non-homdel	NA	NA	NA	NA	NA	NA	NA	NA	NA	NA
TCGA-14-1823-01A-01R-1849-01	13.4858	3.85657	TCGA-14-1823	Female	58	[Not Available]	1	543	1	543	Glioblastoma,IDH WT	G4	WT	non-codel	HOMDEL (driver)	HOMDEL (driver)	homdel	no alteration	A289T (driver), AMP (driver)	no alteration	no alteration	Gain chr 19/20	Gain chr 7 & loss chr 10	WT	WT	WT	Methylated
TCGA-28-2509-01A-01R-1850-01	95.2259	6.58835	TCGA-28-2509	Female	77	[Not Available]	0	145	0	145	Glioblastoma,IDH WT	G4	WT	non-codel	no alteration	no alteration	non-homdel	no alteration	no alteration	no alteration	no alteration	No chr 19/20 gain	Gain chr 7 & loss chr 10	WT	WT	WT	Methylated
TCGA-06-2563-01A-01R-1849-01	20.2007	4.40604	TCGA-06-2563	Female	72	[Not Available]	0	932	0	932	Glioblastoma,IDH WT	G4	WT	non-codel	HOMDEL (driver)	HOMDEL (driver)	homdel	no alteration	R252C (driver), AMP (driver)	no alteration	no alteration	Gain chr 19/20	Gain chr 7 & loss chr 10	WT	WT	WT	Methylated
TCGA-06-0158-01A-01R-1849-01	94.6842	6.58021	TCGA-06-0158	Male	73	[Not Available]	1	329	1	329	Glioblastoma,IDH WT	G4	WT	non-codel	HOMDEL (driver)	HOMDEL (driver)	homdel	no alteration	AMP (driver)	no alteration	no alteration	Gain chr 19/20	No combined CNA	WT	WT	WT	NA
TCGA-76-4929-01A-01R-1850-01	28.0699	4.86145	TCGA-76-4929	Female	76	[Not Available]	1	111	1	111	Glioblastoma,IDH WT	G4	WT	non-codel	HOMDEL (driver)	HOMDEL (driver)	homdel	no alteration	no alteration	no alteration	no alteration	No chr 19/20 gain	Gain chr 7 & loss chr 10	WT	WT	WT	Methylated
TCGA-06-0129-01A-01R-1849-01	11.9815	3.69839	TCGA-06-0129	Male	30	[Not Available]	1	1024	1	1024	Astroctyoma, IDH mut	G4	Mutant	non-codel	no alteration	no alteration	non-homdel	no alteration	no alteration	no alteration	no alteration	No chr 19/20 gain	No combined CNA	WT	WT	Mutant	Methylated
TCGA-27-2528-01A-01R-1850-01	32.1371	5.05038	TCGA-27-2528	Male	62	[Not Available]	1	480	1	480	Glioblastoma,IDH WT	G4	WT	non-codel	HOMDEL (driver)	HOMDEL (driver)	homdel	no alteration	R222C (driver), AMP (driver)	no alteration	no alteration	Gain chr 19/20	No combined CNA	WT	WT	WT	Methylated
TCGA-14-1402-02A-01R-2005-01	25.9422	4.7518	TCGA-14-1402	Female	58	[Not Available]	1	975	1	975	NA	G4	NA	non-codel	HOMDEL (driver)	HOMDEL (driver)	homdel	no alteration	AMP (driver)	no alteration	no alteration	Gain chr 19/20	No combined CNA	NA	NA	NA	Methylated
TCGA-26-1442-01A-01R-1850-01	7.8591	3.14716	TCGA-26-1442	Male	43	[Not Available]	0	953	0	953	Astroctyoma, IDH mut	G4	Mutant	non-codel	no alteration	no alteration	non-homdel	no alteration	no alteration	no alteration	no alteration	No chr 19/20 gain	No combined CNA	WT	WT	WT	Methylated
TCGA-32-1982-01A-01R-1850-01	75.974	6.2663	TCGA-32-1982	Female	76	[Not Available]	1	142	1	142	Glioblastoma,IDH WT	G4	WT	non-codel	HOMDEL (driver)	HOMDEL (driver)	homdel	AMP (driver)	G598V (driver), AMP (driver)	no alteration	no alteration	No chr 19/20 gain	Gain chr 7 & loss chr 10	WT	WT	WT	Methylated
TCGA-06-0686-01A-01R-1849-01	23.9688	4.64205	TCGA-06-0686	Male	53	[Not Available]	1	432	1	432	Glioblastoma,IDH WT	G4	WT	non-codel	no alteration	no alteration	non-homdel	no alteration	AMP (driver)	no alteration	no alteration	No chr 19/20 gain	Gain chr 7 & loss chr 10	WT	WT	WT	NA
TCGA-28-5215-01A-01R-1850-01	26.4468	4.77857	TCGA-28-5215	Female	62	[Not Available]	1	335	1	335	Glioblastoma,IDH WT	G4	WT	non-codel	no alteration	HOMDEL (driver)	homdel	no alteration	no alteration	no alteration	no alteration	No chr 19/20 gain	No combined CNA	WT	WT	WT	Methylated
TCGA-06-5858-01A-01R-1849-01	91.8063	6.53615	TCGA-06-5858	Female	45	[Not Available]	0	187	0	187	Glioblastoma,IDH WT	G4	WT	non-codel	no alteration	no alteration	non-homdel	no alteration	no alteration	no alteration	no alteration	No chr 19/20 gain	No combined CNA	WT	WT	Mutant	Unmethylated
TCGA-32-1980-01A-01R-1850-01	83.9031	6.40775	TCGA-32-1980	Male	72	[Not Available]	1	36	1	36	Glioblastoma,IDH WT	G4	WT	non-codel	no alteration	no alteration	non-homdel	no alteration	no alteration	no alteration	no alteration	No chr 19/20 gain	No combined CNA	WT	WT	WT	Unmethylated
TCGA-06-2561-01A-02R-1849-01	23.5306	4.61651	TCGA-06-2561	Female	53	[Not Available]	1	537	1	537	Glioblastoma,IDH WT	G4	WT	non-codel	HOMDEL (driver)	HOMDEL (driver)	homdel	no alteration	R149W	no alteration	no alteration	No chr 19/20 gain	Gain chr 7 & loss chr 10	WT	WT	WT	Unmethylated
TCGA-76-4932-01A-01R-1850-01	6.0583	2.81932	TCGA-76-4932	Female	50	[Not Available]	1	1458	1	1458	Glioblastoma,IDH WT	G4	WT	NA	no alteration	no alteration	non-homdel	no alteration	no alteration	no alteration	no alteration	NA	NA	WT	WT	WT	Methylated
TCGA-28-5207-01A-01R-1850-01	27.8511	4.85055	TCGA-28-5207	Male	71	[Not Available]	1	343	1	343	Glioblastoma,IDH WT	G4	WT	non-codel	no alteration	no alteration	non-homdel	no alteration	A289T (driver)	no alteration	no alteration	No chr 19/20 gain	Gain chr 7 & loss chr 10	WT	WT	WT	Unmethylated
TCGA-27-1832-01A-01R-1850-01	32.2517	5.05536	TCGA-27-1832	Female	59	[Not Available]	1	300	1	300	Glioblastoma,IDH WT	G4	WT	non-codel	no alteration	no alteration	non-homdel	no alteration	AMP (driver)	no alteration	no alteration	No chr 19/20 gain	Gain chr 7 & loss chr 10	WT	WT	WT	Unmethylated
TCGA-14-1825-01A-01R-1850-01	13.8687	3.89421	TCGA-14-1825	Male	70	[Not Available]	1	232	1	232	Glioblastoma,IDH WT	G4	WT	non-codel	HOMDEL (driver)	HOMDEL (driver)	homdel	no alteration	no alteration	no alteration	no alteration	No chr 19/20 gain	Gain chr 7 & loss chr 10	WT	WT	WT	Unmethylated
TCGA-06-0210-01A-01R-1849-01	17.7836	4.2314	TCGA-06-0210	Female	72	[Not Available]	1	225	1	225	Glioblastoma,IDH WT	G4	WT	non-codel	HOMDEL (driver)	HOMDEL (driver)	homdel	no alteration	no alteration	no alteration	no alteration	No chr 19/20 gain	Gain chr 7 & loss chr 10	WT	WT	WT	NA
TCGA-06-0210-02A-01R-2005-01	31.5142	5.023	TCGA-06-0210	Female	72	[Not Available]	1	225	1	225	Glioblastoma,IDH WT	G4	WT	non-codel	HOMDEL (driver)	HOMDEL (driver)	homdel	no alteration	no alteration	no alteration	no alteration	No chr 19/20 gain	Gain chr 7 & loss chr 10	WT	WT	WT	NA
TCGA-32-5222-01A-01R-1850-01	33.3022	5.10023	TCGA-32-5222	Male	66	[Not Available]	1	585	1	585	Glioblastoma,IDH WT	G4	WT	non-codel	HOMDEL (driver)	HOMDEL (driver)	homdel	no alteration	no alteration	no alteration	no alteration	Gain chr 19/20	Gain chr 7 & loss chr 10	WT	WT	WT	Methylated
TCGA-06-0749-01A-01R-1849-01	35.1342	5.17529	TCGA-06-0749	Male	50	[Not Available]	1	82	1	82	Glioblastoma,IDH WT	G4	WT	non-codel	HOMDEL (driver)	HOMDEL (driver)	homdel	no alteration	A289T (driver), V774M	no alteration	no alteration	No chr 19/20 gain	Gain chr 7 & loss chr 10	WT	WT	WT	NA
TCGA-06-0238-01A-02R-1849-01	29.3504	4.92364	TCGA-06-0238	Male	46	[Not Available]	1	405	1	405	Glioblastoma,IDH WT	G4	WT	non-codel	no alteration	no alteration	non-homdel	no alteration	no alteration	no alteration	no alteration	No chr 19/20 gain	Gain chr 7 & loss chr 10	WT	WT	WT	NA
TCGA-06-5856-01A-01R-1849-01	47.6274	5.6037	TCGA-06-5856	Male	58	[Not Available]	1	114	1	114	Glioblastoma,IDH WT	G4	WT	non-codel	no alteration	no alteration	non-homdel	no alteration	A289V (driver), AMP (driver)	no alteration	no alteration	No chr 19/20 gain	Gain chr 7 & loss chr 10	WT	WT	WT	Unmethylated
TCGA-19-2625-01A-01R-1850-01	39.728	5.34795	TCGA-19-2625	Female	76	[Not Available]	1	124	0	124	Glioblastoma,IDH WT	G4	WT	non-codel	no alteration	no alteration	non-homdel	no alteration	no alteration	no alteration	no alteration	No chr 19/20 gain	No combined CNA	WT	WT	WT	Unmethylated
TCGA-06-0152-02A-01R-2005-01	22.8601	4.57653	TCGA-06-0152	Male	68	[Not Available]	1	375	1	375	Glioblastoma,IDH WT	G4	WT	non-codel	no alteration	no alteration	non-homdel	no alteration	AMP (driver)	no alteration	no alteration	No chr 19/20 gain	Gain chr 7 & loss chr 10	NA	WT	WT	NA
TCGA-06-0184-01A-01R-1849-01	69.0107	6.1295	TCGA-06-0184	Male	63	[Not Available]	1	2126	1	2126	Glioblastoma,IDH WT	G4	WT	non-codel	no alteration	no alteration	non-homdel	no alteration	AMP (driver)	no alteration	no alteration	No chr 19/20 gain	Gain chr 7 & loss chr 10	WT	WT	WT	NA
TCGA-06-0219-01A-01R-1849-01	41.5208	5.4101	TCGA-06-0219	Male	67	[Not Available]	1	22	1	22	Glioblastoma,IDH WT	G4	WT	non-codel	HOMDEL (driver)	HOMDEL (driver)	homdel	no alteration	AMP (driver)	no alteration	no alteration	No chr 19/20 gain	No combined CNA	WT	WT	WT	NA
TCGA-12-3653-01A-01R-1849-01	72.648	6.20257	TCGA-12-3653	Female	34	[Not Available]	1	442	1	442	Glioblastoma,IDH WT	G4	WT	non-codel	HOMDEL (driver)	HOMDEL (driver)	homdel	no alteration	AMP (driver)	no alteration	no alteration	No chr 19/20 gain	Gain chr 7 & loss chr 10	WT	WT	WT	Unmethylated
TCGA-26-5132-01A-01R-1850-01	47.3514	5.59549	TCGA-26-5132	Male	74	[Not Available]	0	286	0	286	Glioblastoma,IDH WT	G4	WT	non-codel	no alteration	no alteration	non-homdel	no alteration	AMP (driver)	no alteration	no alteration	No chr 19/20 gain	Gain chr 7 & loss chr 10	WT	WT	WT	Methylated
TCGA-06-0187-01A-01R-1849-01	24.9185	4.69591	TCGA-06-0187	Male	69	[Not Available]	1	828	1	828	Glioblastoma,IDH WT	G4	WT	non-codel	HOMDEL (driver)	HOMDEL (driver)	homdel	no alteration	AMP (driver)	no alteration	no alteration	No chr 19/20 gain	No combined CNA	WT	NA	NA	NA
TCGA-26-5136-01B-01R-1850-01	21.5012	4.49193	TCGA-26-5136	Female	78	[Unknown]	1	577	1	577	Glioblastoma,IDH WT	G4	WT	non-codel	no alteration	no alteration	non-homdel	no alteration	no alteration	no alteration	no alteration	No chr 19/20 gain	Gain chr 7 & loss chr 10	WT	WT	WT	Methylated
TCGA-06-5416-01A-01R-1849-01	4.1344	2.3602	TCGA-06-5416	Female	23	[Not Available]	0	204	0	204	NA	G4	NA	non-codel	no alteration	no alteration	non-homdel	no alteration	no alteration	no alteration	no alteration	No chr 19/20 gain	No combined CNA	WT	NA	NA	Unmethylated
TCGA-41-3915-01A-01R-1850-01	30.0335	4.95575	TCGA-41-3915	Male	48	[Not Available]	1	360	1	360	Glioblastoma,IDH WT	G4	WT	non-codel	no alteration	no alteration	non-homdel	no alteration	no alteration	no alteration	no alteration	No chr 19/20 gain	Gain chr 7 & loss chr 10	WT	WT	WT	Methylated
TCGA-19-1787-01B-01R-1850-01	46.8827	5.58143	TCGA-19-1787	Male	48	[Not Available]	1	385	1	385	NA	G4	NA	non-codel	no alteration	no alteration	non-homdel	HOMDEL	no alteration	no alteration	no alteration	No chr 19/20 gain	Gain chr 7 & loss chr 10	WT	NA	NA	Methylated
TCGA-06-0141-01A-01R-1849-01	49.383	5.65487	TCGA-06-0141	Male	62	[Not Available]	1	313	1	313	Glioblastoma,IDH WT	G4	WT	non-codel	no alteration	no alteration	non-homdel	no alteration	no alteration	no alteration	no alteration	No chr 19/20 gain	No combined CNA	WT	WT	WT	Unmethylated
TCGA-15-1444-01A-02R-1850-01	91.0047	6.52364	TCGA-15-1444	Male	21	Complete Remission/Response	1	1537	1	1537	Astroctyoma, IDH mut	G4	Mutant	non-codel	no alteration	no alteration	non-homdel	no alteration	no alteration	no alteration	no alteration	No chr 19/20 gain	No combined CNA	WT	WT	Mutant	Methylated
TCGA-32-2632-01A-01R-1850-01	57.7487	5.87649	TCGA-32-2632	Male	80	Progressive Disease	1	269	1	269	Glioblastoma,IDH WT	G4	WT	non-codel	no alteration	no alteration	non-homdel	no alteration	L62R (driver), AMP (driver)	no alteration	no alteration	No chr 19/20 gain	No combined CNA	WT	WT	WT	Unmethylated
TCGA-06-5418-01A-01R-1849-01	49.5649	5.66006	TCGA-06-5418	Female	75	[Not Available]	1	83	1	83	Glioblastoma,IDH WT	G4	WT	non-codel	HOMDEL (driver)	HOMDEL (driver)	homdel	R951Q	no alteration	no alteration	no alteration	No chr 19/20 gain	Gain chr 7 & loss chr 10	WT	WT	WT	Unmethylated
TCGA-02-2485-01A-01R-1849-01	55.0651	5.80903	TCGA-02-2485	Male	53	[Not Available]	0	470	0	470	Glioblastoma,IDH WT	G4	WT	non-codel	no alteration	no alteration	non-homdel	no alteration	A289D (driver)	no alteration	no alteration	No chr 19/20 gain	Gain chr 7 & loss chr 10	WT	WT	WT	Unmethylated
TCGA-19-1390-01A-01R-1850-01	28.8157	4.898	TCGA-19-1390	Female	63	[Not Available]	1	772	NA	772	Glioblastoma,IDH WT	G4	WT	non-codel	HOMDEL (driver)	HOMDEL (driver)	homdel	no alteration	no alteration	no alteration	no alteration	No chr 19/20 gain	No combined CNA	WT	WT	WT	Methylated
TCGA-12-5299-01A-02R-1849-01	19.92	4.38681	TCGA-12-5299	Female	56	[Not Available]	1	98	1	98	Glioblastoma,IDH WT	G4	WT	non-codel	HOMDEL (driver)	HOMDEL (driver)	homdel	no alteration	no alteration	no alteration	no alteration	No chr 19/20 gain	Gain chr 7 & loss chr 10	WT	WT	WT	Unmethylated
TCGA-06-0211-01B-01R-1849-01	9.4109	3.38002	TCGA-06-0211	Male	47	[Not Available]	1	360	1	360	Glioblastoma,IDH WT	G4	WT	non-codel	HOMDEL (driver)	HOMDEL (driver)	homdel	no alteration	AMP (driver)	no alteration	no alteration	Gain chr 19/20	Gain chr 7 & loss chr 10	WT	WT	WT	NA
TCGA-06-0211-01A-01R-1849-01	5.3649	2.67014	TCGA-06-0211	Male	47	[Not Available]	1	360	1	360	Glioblastoma,IDH WT	G4	WT	non-codel	HOMDEL (driver)	HOMDEL (driver)	homdel	no alteration	AMP (driver)	no alteration	no alteration	Gain chr 19/20	Gain chr 7 & loss chr 10	WT	WT	WT	NA
TCGA-41-4097-01A-01R-1850-01	59.0196	5.90736	TCGA-41-4097	Female	63	[Not Available]	1	6	1	6	Glioblastoma,IDH WT	G4	WT	non-codel	HOMDEL (driver)	HOMDEL (driver)	homdel	no alteration	no alteration	no alteration	no alteration	No chr 19/20 gain	No combined CNA	WT	WT	WT	Unmethylated
TCGA-27-2526-01A-01R-1850-01	71.8291	6.18644	TCGA-27-2526	Female	79	[Not Available]	1	87	1	87	Glioblastoma,IDH WT	G4	WT	non-codel	no alteration	no alteration	non-homdel	no alteration	AMP (driver)	no alteration	no alteration	No chr 19/20 gain	No combined CNA	WT	WT	WT	Unmethylated
TCGA-06-0138-01A-02R-1849-01	28.8052	4.89749	TCGA-06-0138	Male	43	[Not Available]	1	737	1	737	Glioblastoma,IDH WT	G4	WT	non-codel	no alteration	no alteration	non-homdel	no alteration	AMP (driver)	no alteration	no alteration	No chr 19/20 gain	Gain chr 7 & loss chr 10	WT	NA	NA	NA
TCGA-06-0649-01B-01R-1849-01	49.8058	5.66692	TCGA-06-0649	Female	73	[Not Available]	1	64	1	64	Glioblastoma,IDH WT	G4	WT	non-codel	HOMDEL (driver)	HOMDEL (driver)	homdel	no alteration	no alteration	no alteration	no alteration	No chr 19/20 gain	Gain chr 7 & loss chr 10	WT	WT	WT	NA
TCGA-26-5135-01A-01R-1850-01	12.7719	3.78366	TCGA-26-5135	Female	72	[Unknown]	1	270	NA	270	Glioblastoma,IDH WT	G4	WT	non-codel	no alteration	no alteration	non-homdel	no alteration	no alteration	no alteration	no alteration	No chr 19/20 gain	Gain chr 7 & loss chr 10	WT	WT	WT	Methylated
TCGA-06-0681-11A-41R-A36H-07	67.6658	6.10152	TCGA-06-0681	NA	NA	NA	NA	NA	NA	NA	NA	NA	NA	NA	NA	NA	non-homdel	NA	NA	NA	NA	NA	NA	NA	NA	NA	NA
TCGA-06-2557-01A-01R-1849-01	27.1719	4.81618	TCGA-06-2557	Male	76	[Not Available]	1	33	1	33	Glioblastoma,IDH WT	G4	WT	non-codel	no alteration	L78Hfs*41 (driver)	non-homdel	no alteration	AMP (driver)	no alteration	no alteration	No chr 19/20 gain	No combined CNA	WT	WT	WT	Unmethylated
TCGA-06-AABW-11A-31R-A36H-07	783.296	9.61525	TCGA-06-AABW	NA	NA	NA	NA	NA	NA	NA	NA	NA	NA	NA	NA	NA	#N/A	NA	NA	NA	NA	NA	NA	NA	NA	NA	NA
TCGA-28-5204-01A-01R-1850-01	7.1817	3.0324	TCGA-28-5204	Male	72	[Not Available]	1	454	1	454	Glioblastoma,IDH WT	G4	WT	non-codel	HOMDEL (driver)	HOMDEL (driver)	homdel	no alteration	AMP (driver)	no alteration	no alteration	No chr 19/20 gain	Gain chr 7 & loss chr 10	WT	WT	WT	Unmethylated
TCGA-06-0745-01A-01R-1849-01	11.0691	3.59325	TCGA-06-0745	Male	59	[Not Available]	1	239	1	239	Glioblastoma,IDH WT	G4	WT	non-codel	HOMDEL (driver)	HOMDEL (driver)	homdel	no alteration	AMP (driver)	no alteration	no alteration	No chr 19/20 gain	Gain chr 7 & loss chr 10	WT	WT	WT	NA
TCGA-19-1389-02A-21R-2005-01	55.4124	5.81794	TCGA-19-1389	Male	51	[Not Available]	1	141	1	141	Glioblastoma,IDH WT	G4	WT	non-codel	HOMDEL (driver)	HOMDEL (driver)	homdel	no alteration	no alteration	no alteration	no alteration	No chr 19/20 gain	Gain chr 7 & loss chr 10	NA	NA	NA	Unmethylated
TCGA-08-0386-01A-01R-1849-01	87.9219	6.47447	TCGA-08-0386	Male	74	[Not Available]	1	548	1	548	Glioblastoma,IDH WT	G4	WT	non-codel	no alteration	no alteration	non-homdel	no alteration	AMP (driver)	no alteration	no alteration	No chr 19/20 gain	Gain chr 7 & loss chr 10	WT	WT	WT	NA
TCGA-19-2620-01A-01R-1850-01	150.493	7.24311	TCGA-19-2620	Male	70	[Not Available]	1	148	0	148	Glioblastoma,IDH WT	G4	WT	non-codel	HOMDEL (driver)	HOMDEL (driver)	homdel	no alteration	G598V (driver), AMP (driver)	no alteration	no alteration	No chr 19/20 gain	No combined CNA	WT	WT	WT	Methylated
TCGA-28-5209-01A-01R-1850-01	60.4213	5.94067	TCGA-28-5209	Female	66	[Not Available]	0	442	0	442	Glioblastoma,IDH WT	G4	WT	non-codel	HOMDEL (driver)	HOMDEL (driver)	homdel	no alteration	G598A (driver), AMP (driver)	no alteration	no alteration	No chr 19/20 gain	Gain chr 7 & loss chr 10	WT	WT	WT	Methylated
TCGA-06-0156-01A-03R-1849-01	23.3951	4.60852	TCGA-06-0156	Male	57	[Not Available]	1	178	1	178	Astroctyoma, IDH mut	G4	Mutant	NA	not profiled	not profiled	non-homdel	not profiled	not profiled	not profiled	not profiled	NA	NA	WT	NA	NA	NA
TCGA-06-0156-01A-02R-1849-01	20.0302	4.39439	TCGA-06-0156	Male	57	[Not Available]	1	178	1	178	Astroctyoma, IDH mut	G4	Mutant	NA	not profiled	not profiled	non-homdel	not profiled	not profiled	not profiled	not profiled	NA	NA	WT	NA	NA	NA
TCGA-06-0675-11A-32R-A36H-07	19.4003	4.35052	TCGA-06-0675	NA	NA	NA	NA	NA	NA	NA	NA	NA	NA	NA	NA	NA	non-homdel	NA	NA	NA	NA	NA	NA	NA	NA	NA	NA
TCGA-26-5134-01A-01R-1850-01	14.7787	3.97991	TCGA-26-5134	Male	74	[Not Available]	0	167	0	167	Glioblastoma,IDH WT	G4	WT	non-codel	HOMDEL (driver)	HOMDEL (driver)	homdel	no alteration	no alteration	no alteration	no alteration	No chr 19/20 gain	No combined CNA	WT	WT	WT	Unmethylated
TCGA-06-0680-11A-32R-A36H-07	32.1508	5.05097	TCGA-06-0680	NA	NA	NA	NA	NA	NA	NA	NA	NA	NA	NA	NA	NA	non-homdel	NA	NA	NA	NA	NA	NA	NA	NA	NA	NA
TCGA-19-2624-01A-01R-1850-01	2.63	1.85997	TCGA-19-2624	Male	51	[Not Available]	1	5	0	5	Glioblastoma,IDH WT	G4	WT	non-codel	no alteration	no alteration	non-homdel	no alteration	AMP (driver)	no alteration	no alteration	No chr 19/20 gain	Gain chr 7 & loss chr 10	WT	WT	WT	Unmethylated
TCGA-14-1829-01A-01R-1850-01	32.525	5.06717	TCGA-14-1829	Male	57	[Not Available]	0	218	0	218	Glioblastoma,IDH WT	G4	WT	non-codel	HOMDEL (driver)	HOMDEL (driver)	homdel	no alteration	T363I (driver), AMP (driver)	no alteration	no alteration	No chr 19/20 gain	Gain chr 7 & loss chr 10	WT	WT	WT	Unmethylated
TCGA-28-1747-01C-01R-1850-01	66.333	6.07324	TCGA-28-1747	Male	44	[Not Available]	1	77	NA	77	Glioblastoma,IDH WT	G4	WT	non-codel	HOMDEL (driver)	HOMDEL (driver)	homdel	no alteration	G598V (driver), H304Y (driver), AMP (driver)	no alteration	no alteration	No chr 19/20 gain	No combined CNA	WT	WT	WT	Methylated
TCGA-06-0221-02A-11R-2005-01	46.6903	5.57562	TCGA-06-0221	Male	31	[Not Available]	1	603	1	603	Astroctyoma, IDH mut	G4	Mutant	non-codel	no alteration	no alteration	non-homdel	no alteration	no alteration	no alteration	no alteration	No chr 19/20 gain	No combined CNA	NA	WT	Mutant	NA
TCGA-76-4925-01A-01R-1850-01	7.8757	3.14986	TCGA-76-4925	Male	76	[Not Available]	1	146	NA	146	Glioblastoma,IDH WT	G4	WT	non-codel	HOMDEL (driver)	HOMDEL (driver)	homdel	no alteration	no alteration	no alteration	no alteration	No chr 19/20 gain	Gain chr 7 & loss chr 10	WT	WT	WT	Methylated
TCGA-14-1034-02B-01R-2005-01	20.802	4.44639	TCGA-14-1034	Female	60	[Not Available]	1	485	1	485	Glioblastoma,IDH WT	G4	WT	non-codel	no alteration	no alteration	non-homdel	no alteration	G63R	no alteration	no alteration	No chr 19/20 gain	Gain chr 7 & loss chr 10	WT	WT	WT	Methylated
TCGA-12-0619-01A-01R-1849-01	52.9058	5.75237	TCGA-12-0619	Male	60	[Not Available]	1	1062	1	1062	Glioblastoma,IDH WT	G4	WT	non-codel	no alteration	no alteration	non-homdel	no alteration	G598V (driver), AMP (driver)	no alteration	no alteration	No chr 19/20 gain	Gain chr 7 & loss chr 10	WT	WT	WT	NA
TCGA-14-1034-01A-01R-1849-01	99.7889	6.65519	TCGA-14-1034	Female	60	[Not Available]	1	485	1	485	Glioblastoma,IDH WT	G4	WT	non-codel	no alteration	no alteration	non-homdel	no alteration	G63R	no alteration	no alteration	No chr 19/20 gain	Gain chr 7 & loss chr 10	WT	WT	WT	Methylated
